# Supplementary material for: Identification of Pol IV and RDR2-dependent precursors of 24 nt siRNAs guiding de novo DNA methylation in Arabidopsis
Source: eLife journal article supplement (doi:10.7554/elife.09591), 2015-10-02
Supplement: supp [file elife_poa_e09591_Supplementary_File_1.xlsx]

## Sheet: P4R2 loci
Blevins et al., supplementary file 1. Intervals in which P4R2 RNAs identified in dcl2/3/4 mutants are also detected in wild-type Col-0 but depleted in nrpd1 or rdr2 mutants (in replicate 1 and/or 2)
P4R2 locus			Replicate 1 RNA-seq dataset					Replicate 2 RNA-seq dataset					RNA-seq dataset(s)
Chr	Start	End	Col-0 24nt siRNAs	Col-0 ≥26 nt RNAs	d234 ≥26 nt RNAs	nrpd1 ≥26 nt RNAs	rdr2 ≥26 nt RNAs	Col-0 24nt siRNAs	Col-0 ≥26 nt RNAs	d234 ≥26 nt RNAs	nrpd1 ≥26 nt RNAs	rdr2 ≥26 nt RNAs	supporting P4R2 status
Chr1	701	800	481.28	11.46	104.16	0	0	507	6	89.63	0	0	Replicate1 + Replicate2
Chr1	18101	18200	1465.33	40.11	578.67	1.56	0	1599	19	393.01	1.36	0	Replicate1 + Replicate2
Chr1	55701	55800	365.26	5.73	135.57	0	0	377	1	85.5	0	0	Replicate1
Chr1	239101	239200	229.18	2.86	26.45	0	0	222	7	16.55	0	0	Replicate2
Chr1	257701	257800	395.34	2.86	33.07	0	0	359	5	28.96	0	0	Replicate2
Chr1	258001	258600	5718.09	80.2	2680.05	3.12	4.52	5525	79	2304.29	6.78	2.8	Replicate1 + Replicate2
Chr1	423601	423700	207.7	5.73	54.56	0	0	201	2	49.64	0	1.4	Replicate1
Chr1	424001	424100	206.26	5.73	56.21	0	0	204	2	48.26	0	1.4	Replicate1
Chr1	431301	431500	909.56	7.16	380.27	1.56	0	771	11	438.52	1.36	1.4	Replicate1 + Replicate2
Chr1	431901	432000	1017	4.3	153.76	3.11	0	1102	5	146.17	0	1.4	Replicate2
Chr1	433001	433300	2551.09	21.49	400.11	0	0	2461	22	410.94	0	2.8	Replicate1 + Replicate2
Chr1	499401	499500	54.43	7.16	19.84	0	0	38	1	13.79	1.36	0	Replicate1
Chr1	500001	500200	12519.1	20.05	1013.49	3.12	0	11028	22	1024.58	0	0	Replicate1 + Replicate2
Chr1	500601	500700	94.54	2.86	33.07	0	0	118	5	44.13	0	0	Replicate2
Chr1	513001	513100	186.21	2.86	24.8	0	0	146	5	31.72	1.36	0	Replicate2
Chr1	540901	541000	386.75	12.89	213.28	0	0	389	6	190.3	0	0	Replicate1 + Replicate2
Chr1	587501	587600	1289.15	38.67	555.52	0	1.51	1106	19	330.96	1.36	1.4	Replicate1 + Replicate2
Chr1	634301	634400	1786.19	12.89	368.69	1.56	0	1872	15	268.9	0	1.4	Replicate1 + Replicate2
Chr1	696501	696600	618.79	15.76	272.8	0	0	605	11	217.88	0	0	Replicate1 + Replicate2
Chr1	758601	758800	3476.4	28.65	578.67	0	3.01	3289	21	519.88	0	2.8	Replicate1 + Replicate2
Chr1	759001	759100	499.9	7.16	166.99	0	1.51	529	16	184.78	2.71	1.4	Replicate1 + Replicate2
Chr1	759801	759900	63.03	5.73	34.72	0	0	68	1	31.72	0	0	Replicate1
Chr1	760401	760500	121.75	1.43	28.11	0	0	66	5	34.47	0	0	Replicate2
Chr1	781501	781800	711.89	12.89	99.19	0	0	852	5	86.87	0	1.4	Replicate1
Chr1	792101	792200	323.72	7.16	38.03	0	0	366	1	46.89	0	0	Replicate1
Chr1	888801	889300	1256.21	21.48	196.75	0	0	1581	12	173.75	0	2.8	Replicate1
Chr1	889401	889500	204.83	4.3	8.27	0	0	237	5	9.65	1.36	0	Replicate2
Chr1	944301	944400	229.18	5.73	170.29	0	0	345	9	184.78	1.36	0	Replicate1 + Replicate2
Chr1	1160201	1160300	1422.36	30.08	917.6	0	3.01	1413	21	692.25	0	1.4	Replicate1 + Replicate2
Chr1	1184901	1185000	141.81	10.03	38.03	0	0	141	6	23.44	0	0	Replicate1 + Replicate2
Chr1	1194601	1194700	346.64	1.43	47.95	0	0	352	6	31.72	0	0	Replicate2
Chr1	1194901	1195100	1664.44	27.22	214.93	0	0	1591	11	180.64	0	0	Replicate1 + Replicate2
Chr1	1249901	1250000	481.28	7.16	77.71	0	0	610	4	63.43	0	1.4	Replicate1
Chr1	1250601	1250900	548.61	14.32	64.48	0	0	619	4	56.54	0	1.4	Replicate1
Chr1	1289401	1289500	481.28	7.16	81.01	0	0	609	4	64.81	0	1.4	Replicate1
Chr1	1430301	1430400	5759.64	7.16	239.73	1.56	0	3840	7	226.15	4.07	1.4	Replicate1
Chr1	1430801	1431000	2425.03	28.64	942.4	0	0	2491	32	972.19	1.36	1.4	Replicate1 + Replicate2
Chr1	1443701	1443800	27.22	5.73	21.49	0	0	24	0	28.96	0	0	Replicate1
Chr1	1444501	1444600	117.46	4.3	59.52	0	0	131	5	71.71	0	0	Replicate2
Chr1	1445901	1446000	87.38	5.73	16.53	0	0	109	0	8.27	0	0	Replicate1
Chr1	1598301	1598400	204.83	7.16	41.33	0	0	310	2	39.99	0	0	Replicate1
Chr1	1613201	1613300	140.37	7.16	14.88	0	0	175	4	15.17	0	0	Replicate1
Chr1	1614501	1614600	1201.77	5.73	49.6	0	1.51	1246	12	34.47	0	0	Replicate1 + Replicate2
Chr1	1617701	1617800	253.53	8.59	99.2	0	0	207	6	81.36	0	0	Replicate1 + Replicate2
Chr1	1729101	1729200	143.24	5.73	26.45	0	0	144	1	19.31	0	0	Replicate1
Chr1	1975401	1975600	2331.93	28.65	162.02	0	4.52	2201	11	183.4	0	0	Replicate1 + Replicate2
Chr1	1976101	1976200	254.97	8.59	92.59	0	0	257	5	66.19	0	0	Replicate1 + Replicate2
Chr1	1976501	1976600	303.67	14.32	223.2	0	0	263	6	146.17	0	0	Replicate1 + Replicate2
Chr1	2157101	2157200	296.5	8.59	163.68	0	0	396	5	205.47	1.36	0	Replicate1 + Replicate2
Chr1	2157401	2157500	1790.49	2.86	114.08	0	0	1295	8	82.74	0	0	Replicate2
Chr1	2234101	2234200	2119.94	2.86	94.24	0	1.51	1912	6	110.32	1.36	1.4	Replicate2
Chr1	2234501	2234600	485.58	5.73	77.71	0	0	315	4	60.68	0	1.4	Replicate1
Chr1	2277901	2278000	12.89	1.43	314.13	0	1.51	6	6	288.21	0	0	Replicate2
Chr1	2473201	2473300	485.58	8.59	193.44	0	0	502	5	151.69	4.07	0	Replicate1
Chr1	2531401	2531600	1661.58	2.86	370.34	1.56	1.51	2107	17	402.66	0	1.4	Replicate2
Chr1	2533101	2533200	282.18	5.73	276.11	0	0	315	8	249.6	0	0	Replicate1 + Replicate2
Chr1	2587301	2587400	1538.39	35.81	507.57	0	1.51	1246	18	361.29	4.07	0	Replicate1 + Replicate2
Chr1	2587901	2588000	179.05	11.46	219.89	0	0	182	2	158.58	0	0	Replicate1
Chr1	2657801	2657900	365.26	7.16	8.27	0	0	239	3	0	0	0	Replicate1
Chr1	2788501	2788700	515.66	28.64	94.24	1.56	0	594	20	103.42	1.36	1.4	Replicate1 + Replicate2
Chr1	2789101	2789200	272.15	8.59	99.2	0	0	245	7	78.6	0	0	Replicate1 + Replicate2
Chr1	2793601	2793700	88.81	7.16	89.28	0	0	106	4	104.8	0	0	Replicate1
Chr1	2794101	2794200	54.43	5.73	82.67	0	0	58	1	103.42	0	0	Replicate1
Chr1	2795401	2795500	169.02	7.16	176.91	0	0	174	1	142.04	0	0	Replicate1
Chr1	2795701	2795800	794.98	1.43	472.85	0	1.51	798	5	452.31	1.36	0	Replicate2
Chr1	2800501	2800700	1015.56	20.05	213.28	4.67	1.51	1172	25	209.61	0	0	Replicate1 + Replicate2
Chr1	2971901	2972000	1.43	0	0	0	4.52	1	5	6.89	0	1.4	Replicate2
Chr1	3023601	3023900	1405.18	11.46	114.08	0	0	1341	13	106.18	0	0	Replicate1 + Replicate2
Chr1	3024001	3024300	339.48	14.32	57.87	0	0	405	4	68.95	0	0	Replicate1
Chr1	3062001	3062100	20.05	5.73	8.27	3.11	0	25	6	12.41	0	0	Replicate2
Chr1	3063601	3063700	240.64	2.86	133.92	0	0	350	6	124.11	0	0	Replicate2
Chr1	3073401	3073600	233.48	5.73	171.95	3.11	0	232	10	108.94	0	0	Replicate2
Chr1	3073801	3073900	266.42	12.89	152.11	1.56	0	313	5	92.39	0	0	Replicate1 + Replicate2
Chr1	3251301	3251400	1796.22	57.3	869.65	0	1.51	1471	18	554.35	1.36	2.8	Replicate1 + Replicate2
Chr1	3342901	3343000	201.97	2.86	41.33	0	0	305	5	48.26	0	0	Replicate2
Chr1	3360501	3360600	131.78	10.03	36.37	0	0	141	12	46.89	0	0	Replicate1 + Replicate2
Chr1	3413001	3413100	495.61	8.59	26.45	0	0	564	3	31.72	0	0	Replicate1
Chr1	3546801	3546900	141.81	0	57.87	0	1.51	162	8	39.99	0	0	Replicate2
Chr1	3730201	3730300	309.4	5.73	1.65	0	0	457	5	5.52	0	0	Replicate2
Chr1	3780801	3781300	2990.83	51.57	712.58	0	0	3439	48	711.56	1.36	1.4	Replicate1 + Replicate2
Chr1	3783401	3783500	147.54	2.86	52.91	0	0	167	5	52.4	0	0	Replicate2
Chr1	3785301	3785700	2869.07	50.14	669.6	0	0	3333	43	679.84	1.36	1.4	Replicate1 + Replicate2
Chr1	3825801	3826000	581.55	21.48	401.76	0	0	657	14	304.75	0	4.2	Replicate1 + Replicate2
Chr1	3826701	3826800	111.73	4.3	168.64	0	0	151	5	147.55	0	0	Replicate2
Chr1	4094201	4094400	1522.62	30.08	529.06	3.11	1.51	1585	33	490.92	2.72	0	Replicate1 + Replicate2
Chr1	4110101	4111000	7396.87	124.62	2863.58	7.79	3.02	7761	131	2493.2	9.5	2.8	Replicate1 + Replicate2
Chr1	4209501	4209600	1186.02	10.03	352.16	0	0	1749	18	319.92	0	0	Replicate1 + Replicate2
Chr1	4329901	4330000	256.4	1.43	95.89	0	0	236	7	73.09	0	0	Replicate2
Chr1	4406101	4406500	4029.32	31.5	1658.28	0	4.53	4702	34	1388.64	2.71	2.8	Replicate1 + Replicate2
Chr1	4407201	4407300	73.05	0	61.17	0	0	105	5	66.19	0	0	Replicate2
Chr1	4407301	4407400	2148.58	24.35	1244.96	0	0	2374	8	1268.66	5.43	1.4	Replicate1
Chr1	4408101	4408200	157.56	5.73	62.83	0	0	138	3	86.88	0	0	Replicate1
Chr1	4408201	4408300	253.53	1.43	44.64	0	0	192	6	34.47	0	0	Replicate2
Chr1	4408801	4408900	55.86	5.73	28.11	0	1.51	86	4	24.82	0	0	Replicate1
Chr1	4410901	4411000	388.18	5.73	383.57	0	0	357	0	253.73	1.36	0	Replicate1
Chr1	4411001	4411100	2589.76	4.3	935.78	0	3.01	3102	10	843.94	0	2.8	Replicate2
Chr1	4583401	4583500	2290.39	55.86	767.14	0	1.51	1880	14	468.85	1.36	1.4	Replicate1 + Replicate2
Chr1	4682401	4682500	242.07	2.86	33.07	0	0	273	6	34.47	0	0	Replicate2
Chr1	4786401	4786500	11570.8	27.22	1392.1	4.67	0	11110	27	1292.11	1.36	1.4	Replicate1 + Replicate2
Chr1	4896601	4896700	1863.54	8.59	67.79	0	0	1365	4	59.3	0	0	Replicate1
Chr1	4896701	4896800	24.35	1.43	6.61	0	0	46	6	17.93	0	0	Replicate2
Chr1	4966601	4966700	373.85	5.73	114.08	0	0	403	6	79.98	0	0	Replicate1 + Replicate2
Chr1	5056001	5056300	1564.17	31.51	104.16	1.56	1.51	1622	23	77.22	0	1.4	Replicate1 + Replicate2
Chr1	5098501	5098600	1067.13	12.89	92.59	0	0	884	0	74.47	1.36	0	Replicate1
Chr1	5101901	5102000	2492.36	10.03	628.27	0	0	2093	26	692.25	1.36	0	Replicate1 + Replicate2
Chr1	5171801	5172000	1385.12	8.59	57.87	1.56	0	1265	13	45.5	0	0	Replicate2
Chr1	5391501	5391600	789.25	7.16	79.36	0	0	1014	8	108.94	1.36	0	Replicate1 + Replicate2
Chr1	5392501	5392600	684.68	1.43	105.81	0	1.51	662	6	103.42	2.71	0	Replicate2
Chr1	5659101	5659300	3145.52	237.78	3559.62	0	4.52	4128	241	3068.24	5.43	0	Replicate1 + Replicate2
Chr1	5681701	5681800	1528.36	2.86	243.04	1.56	1.51	1966	5	324.06	0	1.4	Replicate2
Chr1	5699901	5700000	94.54	8.59	38.03	0	0	84	6	35.85	1.36	0	Replicate1 + Replicate2
Chr1	5700601	5700700	415.39	4.3	198.4	0	0	466	8	202.71	0	0	Replicate2
Chr1	5700901	5701000	442.61	8.59	52.91	0	0	406	13	48.26	0	0	Replicate1 + Replicate2
Chr1	5701901	5702100	601.61	20.05	203.36	0	1.51	632	13	175.14	0	0	Replicate1 + Replicate2
Chr1	5799401	5799500	219.16	8.59	42.99	0	1.51	239	2	35.85	0	0	Replicate1
Chr1	5862901	5863000	249.24	4.3	57.87	0	0	328	7	56.54	0	0	Replicate2
Chr1	5899601	5899700	1684.49	22.92	580.32	0	0	1916	25	486.78	4.07	0	Replicate1 + Replicate2
Chr1	5911701	5911800	898.11	22.92	906.02	0	0	1250	29	758.44	2.71	1.4	Replicate1 + Replicate2
Chr1	5916401	5916500	764.9	8.59	444.75	0	0	1107	18	477.13	0	0	Replicate1 + Replicate2
Chr1	5958801	5958900	727.65	10.03	90.93	0	0	847	5	103.42	1.36	1.4	Replicate1
Chr1	5970701	5970800	889.51	4.3	214.93	0	0	1238	6	191.68	0	0	Replicate2
Chr1	6102701	6102800	474.12	4.3	36.37	0	0	458	6	49.64	0	0	Replicate2
Chr1	6156601	6157000	1935.16	21.48	1041.6	1.56	0	1938	16	972.18	2.71	4.2	Replicate1 + Replicate2
Chr1	6158601	6158700	1611.44	7.16	1066.4	0	3.01	1545	14	948.74	1.36	0	Replicate1 + Replicate2
Chr1	6210901	6211000	133.21	1.43	3.31	1.56	0	117	8	11.03	0	0	Replicate2
Chr1	6211901	6212000	128.92	2.86	3.31	1.56	0	118	8	8.27	0	2.8	Replicate2
Chr1	6218601	6218800	2667.11	37.24	884.53	0	1.51	2395	33	643.98	4.07	2.8	Replicate1 + Replicate2
Chr1	6273501	6273600	187.64	2.86	170.29	1.56	0	162	5	162.72	0	0	Replicate2
Chr1	6302601	6302700	183.35	5.73	41.33	0	0	209	2	45.51	0	0	Replicate1
Chr1	6302901	6303000	1794.78	2.86	115.73	0	0	1298	8	85.5	0	0	Replicate2
Chr1	6426301	6426400	399.64	7.16	34.72	0	0	514	5	27.58	0	0	Replicate1 + Replicate2
Chr1	6454701	6454800	63.03	8.59	42.99	0	0	89	2	35.85	0	0	Replicate1
Chr1	6470401	6470500	2354.85	14.32	274.45	0	0	2360	32	256.49	2.71	0	Replicate1 + Replicate2
Chr1	6515201	6515300	628.82	15.76	198.4	0	0	520	8	184.78	0	0	Replicate1 + Replicate2
Chr1	6538401	6538600	3436.3	25.78	2232	1.56	6.03	4032	24	1998.15	4.07	2.8	Replicate1 + Replicate2
Chr1	6540601	6540700	65.89	5.73	41.33	0	1.51	93	4	37.23	0	0	Replicate1
Chr1	6541201	6541300	190.51	1.43	42.99	0	0	147	5	26.2	0	0	Replicate2
Chr1	6541901	6542200	2793.15	22.91	990.35	0	0	3088	13	969.42	6.78	1.4	Replicate1
Chr1	6543001	6543500	4940.31	45.83	3600.96	3.12	10.55	5644	53	3312.31	8.13	4.2	Replicate1 + Replicate2
Chr1	6574701	6574800	28.65	5.73	19.84	0	0	40	2	13.79	0	0	Replicate1
Chr1	6593101	6593200	103.13	0	34.72	0	0	113	5	13.79	0	1.4	Replicate2
Chr1	6657201	6657300	34.38	5.73	13.23	0	0	36	2	28.96	1.36	0	Replicate1
Chr1	6704201	6704300	408.23	4.3	535.68	0	0	356	5	394.39	0	0	Replicate2
Chr1	6705101	6705200	42.97	1.43	16.53	0	0	54	5	5.52	0	0	Replicate2
Chr1	6706401	6706500	65.89	5.73	41.33	0	1.51	93	4	37.23	0	0	Replicate1
Chr1	6707001	6707100	263.56	1.43	44.64	0	0	191	5	30.34	0	0	Replicate2
Chr1	6707701	6708000	2770.24	22.91	973.81	0	0	3072	13	950.13	6.78	1.4	Replicate1
Chr1	6708901	6709000	570.09	8.59	418.29	0	1.51	621	7	366.81	1.36	2.8	Replicate1
Chr1	6709101	6709300	3482.14	20.05	2561	3.11	9.04	4178	25	2453.21	2.72	2.8	Replicate1 + Replicate2
Chr1	6715401	6715500	286.48	7.16	171.95	0	0	340	2	133.76	0	0	Replicate1
Chr1	6715501	6715600	230.61	1.43	46.29	0	0	271	5	48.26	0	0	Replicate2
Chr1	6718001	6718100	610.2	17.19	94.24	0	0	727	20	126.87	0	0	Replicate1 + Replicate2
Chr1	6720801	6720900	641.71	17.19	85.97	0	0	783	19	125.49	0	0	Replicate1 + Replicate2
Chr1	6722901	6723100	1770.44	32.95	81.02	0	1.51	1823	39	103.43	0	0	Replicate1 + Replicate2
Chr1	6736801	6736900	296.5	8.59	79.36	0	0	273	4	60.68	0	0	Replicate1
Chr1	6737101	6737200	55.86	5.73	18.19	0	0	93	1	28.96	0	0	Replicate1
Chr1	6759601	6759700	306.53	20.05	72.75	0	0	314	11	75.84	0	1.4	Replicate1 + Replicate2
Chr1	6906201	6906300	3258.69	10.03	1717.81	1.56	6.03	4039	15	1365.19	1.36	4.2	Replicate2
Chr1	6951401	6951500	4.3	1.43	200.05	1.56	0	6	5	193.06	0	0	Replicate2
Chr1	7023601	7023700	292.21	5.73	41.33	0	1.51	398	2	44.13	0	0	Replicate1
Chr1	7036101	7036200	428.28	5.73	155.41	0	1.51	479	3	155.83	0	0	Replicate1
Chr1	7077801	7077900	968.3	7.16	46.29	0	0	697	4	24.82	1.36	0	Replicate1
Chr1	7241201	7241300	1781.89	12.89	249.65	0	0	2116	7	237.19	0	0	Replicate1 + Replicate2
Chr1	7255401	7255500	98.83	5.73	14.88	0	0	96	0	8.27	0	0	Replicate1
Chr1	7257001	7257100	461.23	7.16	165.33	1.56	0	506	5	126.87	2.71	0	Replicate1
Chr1	7281801	7281900	1862.11	22.92	684.48	0	0	1755	13	550.21	0	0	Replicate1 + Replicate2
Chr1	7282101	7282400	1972.4	17.18	340.59	0	1.51	2098	29	335.09	0	1.4	Replicate1 + Replicate2
Chr1	7283901	7284000	243.51	4.3	84.32	0	0	174	6	95.15	0	0	Replicate2
Chr1	7344401	7344600	250.67	1.43	64.48	0	0	338	10	48.27	0	0	Replicate2
Chr1	7352901	7353100	1018.43	20.05	218.24	6.23	1.51	1174	25	209.6	1.36	0	Replicate1 + Replicate2
Chr1	7357801	7357900	802.14	1.43	286.03	0	1.51	804	5	233.05	1.36	0	Replicate2
Chr1	7358101	7358200	169.02	10.03	231.47	0	0	174	1	195.82	0	0	Replicate1
Chr1	7359401	7359500	54.43	5.73	81.01	0	0	58	1	102.04	0	0	Replicate1
Chr1	7359901	7360000	94.54	7.16	89.28	0	0	109	4	104.8	0	0	Replicate1
Chr1	7364401	7364500	272.15	8.59	100.85	0	0	245	7	81.36	0	0	Replicate1 + Replicate2
Chr1	7364901	7365100	515.66	27.21	92.58	1.56	0	595	20	102.04	1.36	1.4	Replicate1 + Replicate2
Chr1	7365801	7366000	2745.89	12.89	223.2	0	0	2471	23	257.87	0	0	Replicate1 + Replicate2
Chr1	7392401	7392500	355.23	4.3	13.23	0	0	399	8	15.17	0	0	Replicate2
Chr1	7393101	7393400	817.89	15.75	42.99	0	0	790	7	55.16	0	0	Replicate1 + Replicate2
Chr1	7541301	7541400	345.21	2.86	1.65	0	0	266	5	6.89	0	0	Replicate2
Chr1	7665701	7665800	880.92	7.16	13.23	0	0	644	10	19.31	0	0	Replicate1 + Replicate2
Chr1	7714701	7715000	2218.77	27.21	441.44	0	0	2409	23	446.79	1.36	0	Replicate1 + Replicate2
Chr1	7717501	7717600	243.51	7.16	84.32	0	0	381	2	75.84	0	0	Replicate1
Chr1	7722101	7722400	2194.43	24.35	414.98	0	0	2365	22	444.03	1.36	0	Replicate1 + Replicate2
Chr1	7725301	7725400	6593.29	97.4	1795.52	1.56	1.51	7668	97	1919.55	4.07	1.4	Replicate1 + Replicate2
Chr1	7761201	7761300	707.6	10.03	26.45	1.56	0	934	16	31.72	1.36	0	Replicate1 + Replicate2
Chr1	7761501	7762100	6471.54	98.82	2789.17	6.22	3.01	6515	103	2436.65	8.14	2.8	Replicate1 + Replicate2
Chr1	7833501	7833600	30.08	5.73	6.61	0	0	33	3	17.93	0	0	Replicate1
Chr1	7960501	7961100	6852.55	74.48	3151.26	14.01	6.03	6180	57	3082.03	4.08	4.2	Replicate1 + Replicate2
Chr1	7985101	7985200	1837.76	14.32	347.2	0	0	2089	18	332.34	0	0	Replicate1 + Replicate2
Chr1	8115401	8115500	1031.32	12.89	203.36	1.56	0	735	16	193.06	4.07	0	Replicate1 + Replicate2
Chr1	8115701	8115800	247.8	7.16	97.55	0	0	338	2	68.95	0	0	Replicate1
Chr1	8116001	8116300	13188	20.04	1178.82	3.11	0	7787	23	1216.27	0	1.4	Replicate1 + Replicate2
Chr1	8116501	8116600	358.1	5.73	102.51	0	0	388	3	96.53	0	0	Replicate1
Chr1	8189901	8190000	381.02	2.86	130.61	0	0	460	9	133.76	0	0	Replicate2
Chr1	8190401	8190500	214.86	12.89	221.55	0	0	162	4	206.85	0	0	Replicate1
Chr1	8201401	8201500	342.34	8.59	124	0	0	433	6	113.08	0	0	Replicate1 + Replicate2
Chr1	8254801	8254900	1501.14	10.03	82.67	0	0	1127	7	74.47	0	0	Replicate1 + Replicate2
Chr1	8267401	8267500	3480.71	48.7	958.93	0	0	3659	47	905.99	1.36	0	Replicate1 + Replicate2
Chr1	8272501	8272600	688.98	11.46	181.87	0	0	727	9	180.65	2.71	0	Replicate1 + Replicate2
Chr1	8277301	8277500	6866.87	110.29	2076.58	1.56	1.51	7991	112	2120.87	5.43	2.8	Replicate1 + Replicate2
Chr1	8289801	8290000	519.95	24.35	71.1	0	3.01	652	17	77.22	0	0	Replicate1 + Replicate2
Chr1	8290401	8290700	1180.29	31.51	390.18	0	0	1256	25	343.36	0	0	Replicate1 + Replicate2
Chr1	8290901	8291000	87.38	1.43	89.28	0	0	93	6	68.95	0	1.4	Replicate2
Chr1	8319601	8319700	613.06	1.43	26.45	0	0	576	5	16.55	0	0	Replicate2
Chr1	8374901	8375000	116.02	4.3	132.27	0	0	149	6	143.41	0	0	Replicate2
Chr1	8453501	8453600	1803.38	10.03	269.49	0	0	1521	13	310.27	0	0	Replicate1 + Replicate2
Chr1	8454301	8454600	485.58	7.16	304.21	1.56	0	384	12	301.99	0	0	Replicate2
Chr1	8456701	8457500	2927.79	44.39	3103.29	0	6.03	2981	35	2462.87	1.36	4.2	Replicate1 + Replicate2
Chr1	8489501	8489600	124.62	7.16	19.84	0	0	87	1	15.17	1.36	0	Replicate1
Chr1	8539601	8539700	2115.64	53	920.9	0	0	1751	24	615.03	4.07	0	Replicate1 + Replicate2
Chr1	8622801	8622900	1409.47	31.51	707.62	0	1.51	1338	24	441.27	1.36	0	Replicate1 + Replicate2
Chr1	8644701	8644800	30.08	5.73	16.53	0	0	32	0	8.27	0	0	Replicate1
Chr1	8682001	8682100	434.01	5.73	138.88	0	0	347	2	95.15	0	1.4	Replicate1
Chr1	8727101	8727200	14.32	4.3	510.88	0	1.51	7	8	508.84	1.36	0	Replicate2
Chr1	8765801	8766200	916.73	47.27	385.23	1.56	0	858	21	321.31	0	5.6	Replicate1 + Replicate2
Chr1	8766601	8766700	214.86	10.03	67.79	0	0	242	11	71.71	0	0	Replicate1 + Replicate2
Chr1	8767001	8767400	3576.67	58.73	611.74	4.67	0	3761	56	508.84	1.36	1.4	Replicate1 + Replicate2
Chr1	8771701	8771800	322.29	1.43	165.33	1.56	0	254	5	170.99	0	0	Replicate2
Chr1	8774401	8774500	40.11	5.73	52.91	1.56	0	69	0	44.13	0	0	Replicate1
Chr1	8775301	8775400	31.51	0	72.75	0	0	45	5	84.12	0	0	Replicate2
Chr1	8775501	8775700	753.44	35.81	124	1.56	1.51	819	33	136.52	0	4.2	Replicate1 + Replicate2
Chr1	8778301	8778900	2372.03	21.48	1284.64	0	3.02	2521	34	1352.78	2.71	0	Replicate1 + Replicate2
Chr1	8778301	8778900	2372.03	21.48	1284.64	0	3.02	2521	34	1352.78	2.71	0	Replicate1 + Replicate2
Chr1	8780201	8780500	668.93	45.83	363.73	0	0	625	18	295.11	0	4.2	Replicate1 + Replicate2
Chr1	8781001	8781100	293.64	12.89	92.59	0	0	329	11	89.63	0	0	Replicate1 + Replicate2
Chr1	8781401	8781700	3492.16	58.72	601.81	4.67	0	3704	56	501.96	1.36	1.4	Replicate1 + Replicate2
Chr1	8786101	8786200	326.58	1.43	152.11	1.56	0	251	5	169.61	0	0	Replicate2
Chr1	8788001	8788100	224.89	4.3	229.81	0	1.51	193	5	228.91	0	0	Replicate2
Chr1	8788801	8788900	40.11	5.73	47.95	1.56	0	65	0	35.85	0	0	Replicate1
Chr1	8789901	8790300	1972.39	65.89	2124.53	1.56	6.03	1830	83	2076.75	2.71	4.2	Replicate1 + Replicate2
Chr1	8797701	8797800	18.62	5.73	76.05	0	0	21	2	92.39	0	0	Replicate1
Chr1	8798101	8798400	739.11	28.64	124	1.56	3.01	778	35	110.32	1.36	7	Replicate1 + Replicate2
Chr1	8800801	8800900	229.18	1.43	112.43	0	0	254	5	118.59	1.36	0	Replicate2
Chr1	8800901	8801000	495.61	8.59	178.56	0	1.51	500	4	194.44	0	0	Replicate1
Chr1	8801101	8801500	1572.76	12.88	915.94	0	3.02	1661	26	951.49	2.71	0	Replicate2
Chr1	8802701	8803100	913.87	47.26	385.23	1.56	0	855	21	321.31	0	5.6	Replicate1 + Replicate2
Chr1	8803501	8803700	465.52	14.32	262.88	1.56	0	567	13	227.53	0	0	Replicate1 + Replicate2
Chr1	8803901	8804300	3579.55	58.72	615.04	4.67	0	3763	57	514.36	1.36	1.4	Replicate1 + Replicate2
Chr1	8808601	8808700	320.86	1.43	165.33	1.56	0	254	5	170.99	0	0	Replicate2
Chr1	8811301	8811400	40.11	5.73	56.21	1.56	0	72	0	44.13	0	0	Replicate1
Chr1	8812201	8812300	32.94	0	72.75	0	1.51	45	5	84.12	0	0	Replicate2
Chr1	8812501	8812600	676.09	31.51	109.12	0	0	754	32	114.46	0	2.8	Replicate1 + Replicate2
Chr1	8815201	8815900	2518.14	25.77	1392.11	0	6.03	2698	38	1481.02	2.71	0	Replicate1 + Replicate2
Chr1	8817101	8817400	634.55	42.97	353.81	0	0	594	15	289.59	0	4.2	Replicate1 + Replicate2
Chr1	8817401	8817500	303.67	4.3	41.33	1.56	0	278	6	48.26	0	1.4	Replicate2
Chr1	8817901	8818000	227.75	12.89	76.05	0	0	262	11	82.74	0	0	Replicate1 + Replicate2
Chr1	8818301	8818600	3492.17	58.72	605.12	4.67	0	3704	56	501.95	1.36	1.4	Replicate1 + Replicate2
Chr1	8823001	8823100	323.72	1.43	165.33	1.56	0	255	5	169.61	0	0	Replicate2
Chr1	8824901	8825000	180.48	4.3	226.51	0	1.51	153	5	219.26	0	0	Replicate2
Chr1	8825701	8825800	37.24	5.73	49.6	1.56	0	65	0	38.61	0	0	Replicate1
Chr1	8826601	8826700	28.65	0	64.48	0	0	45	6	73.09	0	0	Replicate2
Chr1	8826801	8827000	753.44	35.81	122.35	1.56	1.51	832	33	136.52	0	4.2	Replicate1 + Replicate2
Chr1	8829601	8830200	2386.36	25.78	1362.34	0	6.04	2558	37	1453.45	2.71	0	Replicate1 + Replicate2
Chr1	8829601	8830200	2386.36	25.78	1362.34	0	6.04	2558	37	1453.45	2.71	0	Replicate1 + Replicate2
Chr1	8831501	8831800	825.06	45.83	373.65	1.56	0	779	19	308.89	0	4.2	Replicate1 + Replicate2
Chr1	8832301	8832400	385.31	12.89	135.57	0	0	464	11	119.97	0	0	Replicate1 + Replicate2
Chr1	8832701	8833000	3075.34	58.72	591.89	4.67	0	3124	55	493.68	1.36	1.4	Replicate1 + Replicate2
Chr1	8927601	8927800	545.74	18.62	79.36	1.56	1.51	558	5	59.3	0	0	Replicate1
Chr1	8931101	8931200	74.48	5.73	201.71	0	0	74	2	166.86	0	0	Replicate1
Chr1	9004801	9005100	2977.94	60.16	1932.74	1.56	1.51	2942	77	1558.25	5.42	5.6	Replicate1 + Replicate2
Chr1	9008501	9008600	421.12	5.73	132.27	0	0	406	0	128.25	0	0	Replicate1
Chr1	9010501	9010600	123.19	1.43	155.41	0	0	93	7	144.79	0	0	Replicate2
Chr1	9012501	9012600	114.59	1.43	100.85	0	0	97	6	115.83	0	0	Replicate2
Chr1	9015601	9015700	256.4	7.16	81.01	1.56	0	257	7	68.95	0	1.4	Replicate1 + Replicate2
Chr1	9062201	9062300	319.42	10.03	277.76	0	3.01	375	10	252.35	0	1.4	Replicate1 + Replicate2
Chr1	9077601	9077700	714.76	1.43	44.64	0	0	610	8	37.23	1.36	0	Replicate2
Chr1	9138201	9138300	1395.15	1.43	107.47	0	0	1608	5	119.97	0	0	Replicate2
Chr1	9174301	9174400	2261.74	14.32	82.67	0	0	2146	21	67.57	0	0	Replicate1 + Replicate2
Chr1	9175601	9175700	296.5	1.43	66.13	0	0	278	6	55.16	0	0	Replicate2
Chr1	9205101	9205200	203.4	1.43	52.91	1.56	0	210	5	38.61	0	0	Replicate2
Chr1	9304701	9305100	2124.24	35.8	583.63	0	4.52	2389	43	521.25	0	0	Replicate1 + Replicate2
Chr1	9305601	9305700	295.07	0	226.51	0	3.01	334	5	182.03	0	0	Replicate2
Chr1	9357901	9358000	229.18	8.59	74.4	0	0	275	7	93.77	0	0	Replicate1 + Replicate2
Chr1	9384201	9384300	2403.55	55.86	786.98	0	1.51	1843	28	508.84	2.71	0	Replicate1 + Replicate2
Chr1	9384901	9385000	244.94	7.16	33.07	0	0	289	4	51.02	0	0	Replicate1
Chr1	9412401	9412500	159	7.16	26.45	0	0	215	3	38.61	0	0	Replicate1
Chr1	9565001	9565100	1498.28	10.03	21.49	0	0	1165	5	15.17	0	0	Replicate1 + Replicate2
Chr1	9626901	9627000	964	15.76	190.13	0	0	802	6	92.39	0	0	Replicate1 + Replicate2
Chr1	9676501	9677000	1435.25	25.78	765.49	1.56	3.02	1272	12	626.06	1.36	4.2	Replicate1
Chr1	9680501	9680600	58.73	5.73	44.64	0	0	72	0	62.05	0	0	Replicate1
Chr1	9681201	9681300	27.22	0	49.6	0	0	37	5	52.4	0	0	Replicate2
Chr1	9683501	9683700	68.75	2.86	180.21	0	0	162	12	227.53	0	0	Replicate2
Chr1	9691001	9691300	2969.34	70.19	1992.26	1.56	1.51	2923	78	1636.85	5.42	5.6	Replicate1 + Replicate2
Chr1	9706601	9707000	1607.14	20.05	186.83	0	0	1671	29	150.31	0	0	Replicate1 + Replicate2
Chr1	9706601	9707000	1607.14	20.05	186.83	0	0	1671	29	150.31	0	0	Replicate1 + Replicate2
Chr1	9746401	9746500	98.83	4.3	31.41	0	0	123	5	33.1	0	0	Replicate2
Chr1	9746501	9746600	269.29	5.73	52.91	0	0	250	4	34.47	0	0	Replicate1
Chr1	9754401	9754600	436.88	21.48	155.41	0	0	479	12	122.73	4.07	1.4	Replicate1 + Replicate2
Chr1	9754801	9754900	406.8	11.46	87.63	0	0	486	9	79.98	4.07	1.4	Replicate1
Chr1	9755101	9755200	492.74	18.62	150.45	0	0	613	17	151.69	0	1.4	Replicate1 + Replicate2
Chr1	9755401	9755500	381.02	8.59	138.88	0	0	497	15	148.93	0	0	Replicate1 + Replicate2
Chr1	9755701	9755800	277.88	7.16	84.32	0	0	300	9	91.01	0	0	Replicate1 + Replicate2
Chr1	9756001	9756100	140.37	7.16	11.57	0	0	120	0	8.27	0	0	Replicate1
Chr1	9756401	9756500	531.42	24.35	186.83	0	0	645	18	176.51	4.07	1.4	Replicate1 + Replicate2
Chr1	9762601	9762700	362.39	1.43	9.92	0	0	418	5	6.89	0	0	Replicate2
Chr1	9811901	9812300	1398.01	24.35	92.58	0	0	1479	20	63.43	1.36	0	Replicate1
Chr1	9816801	9816900	956.84	5.73	109.12	0	0	645	2	85.5	0	0	Replicate1
Chr1	9816901	9817200	518.52	8.59	302.56	0	0	655	17	279.94	0	0	Replicate1 + Replicate2
Chr1	9817401	9817600	13493.1	31.51	1807.09	7.78	0	9114	30	1663.05	0	2.8	Replicate1 + Replicate2
Chr1	9831801	9831900	14.32	2.86	408.37	0	1.51	7	8	387.49	0	0	Replicate2
Chr1	9866101	9866200	1027.02	1.43	102.51	0	0	910	8	110.32	0	0	Replicate2
Chr1	9866401	9866500	401.07	7.16	173.6	0	1.51	514	7	151.69	0	0	Replicate1 + Replicate2
Chr1	9918501	9918600	101.7	11.46	52.91	0	0	92	4	55.16	0	0	Replicate1
Chr1	9919201	9919300	810.73	17.19	570.4	0	1.51	941	17	547.46	2.71	1.4	Replicate1 + Replicate2
Chr1	10013201	10013300	184.78	2.86	57.87	0	1.51	273	10	37.23	0	0	Replicate2
Chr1	10021401	10021500	193.37	1.43	130.61	0	0	177	8	102.04	0	0	Replicate2
Chr1	10021501	10021600	1642.95	10.03	117.39	0	0	1616	5	88.25	2.71	0	Replicate1
Chr1	10021901	10022000	140.37	0	85.97	0	0	179	5	96.53	0	0	Replicate2
Chr1	10152701	10153000	1365.07	12.89	421.6	1.56	0	1555	19	379.22	4.07	0	Replicate1 + Replicate2
Chr1	10156601	10156700	763.46	0	23.15	0	0	674	5	19.31	0	0	Replicate2
Chr1	10206901	10207000	177.62	0	29.76	0	0	195	5	15.17	0	1.4	Replicate2
Chr1	10347401	10347500	106	4.3	343.89	0	0	169	8	319.92	1.36	0	Replicate2
Chr1	10347601	10347700	61.59	5.73	41.33	0	0	73	0	28.96	0	0	Replicate1
Chr1	10348101	10348200	177.62	7.16	54.56	0	0	208	3	63.43	0	0	Replicate1
Chr1	10349201	10349300	259.26	2.86	100.85	0	0	234	7	95.15	0	0	Replicate2
Chr1	10421501	10421600	405.37	5.73	23.15	0	0	263	1	33.1	0	0	Replicate1
Chr1	10444001	10444100	577.25	7.16	85.97	0	0	722	10	48.26	0	0	Replicate1 + Replicate2
Chr1	10497601	10497700	555.77	8.59	143.84	0	0	501	8	95.15	0	0	Replicate1 + Replicate2
Chr1	10506601	10506700	322.29	10.03	89.28	0	0	380	6	78.6	0	0	Replicate1 + Replicate2
Chr1	10507201	10507300	156.13	2.86	39.68	0	0	148	5	22.06	0	0	Replicate2
Chr1	10526101	10526200	6349.78	108.86	2175.78	1.56	1.51	7422	110	2268.43	4.07	1.4	Replicate1 + Replicate2
Chr1	10528601	10528700	222.02	1.43	180.21	0	0	292	5	172.37	1.36	0	Replicate2
Chr1	10570301	10570400	87.38	5.73	18.19	0	0	61	1	24.82	0	0	Replicate1
Chr1	10579901	10580100	2566.84	58.73	1279.68	0	0	2440	33	905.99	1.36	1.4	Replicate1 + Replicate2
Chr1	10591901	10592000	634.55	5.73	54.56	0	0	763	0	56.54	0	0	Replicate1
Chr1	10652701	10652800	207.7	5.73	84.32	0	0	180	4	79.98	0	0	Replicate1
Chr1	10698201	10698300	67.32	7.16	95.89	0	0	49	1	91.01	1.36	0	Replicate1
Chr1	10802401	10803300	6958.55	113.15	2799.1	6.23	3.01	7420	118	2460.12	8.14	2.8	Replicate1 + Replicate2
Chr1	10814301	10814500	1479.66	20.06	595.2	0	1.51	1440	17	632.95	0	0	Replicate1 + Replicate2
Chr1	10853101	10853200	1128.72	21.49	608.43	0	3.01	1110	12	550.21	0	0	Replicate1 + Replicate2
Chr1	10924801	10924900	752	7.16	46.29	0	0	914	7	41.37	0	0	Replicate1 + Replicate2
Chr1	10929401	10929500	186.21	2.86	109.12	0	0	204	5	107.56	0	1.4	Replicate2
Chr1	10931001	10931100	47.27	7.16	21.49	0	0	53	3	19.31	0	0	Replicate1
Chr1	11048901	11049000	426.85	8.59	295.95	0	0	384	1	271.66	0	1.4	Replicate1
Chr1	11051201	11051300	1932.29	12.89	1312.74	0	3.01	1960	17	1125.25	1.36	0	Replicate1 + Replicate2
Chr1	11083101	11083200	1014.13	15.76	28.11	0	0	1274	14	22.06	2.71	0	Replicate1 + Replicate2
Chr1	11102401	11102500	189.08	5.73	29.76	0	0	168	3	22.06	2.71	0	Replicate1
Chr1	11111101	11111200	220.59	7.16	90.93	0	0	218	13	79.98	0	0	Replicate1 + Replicate2
Chr1	11117501	11117600	797.84	21.49	436.48	0	0	777	9	297.86	0	1.4	Replicate1 + Replicate2
Chr1	11129001	11129100	1025.59	7.16	395.15	0	1.51	1098	10	253.73	1.36	0	Replicate1 + Replicate2
Chr1	11132701	11132800	1349.31	30.08	107.47	0	0	1361	16	122.73	0	0	Replicate1 + Replicate2
Chr1	11148201	11148300	446.91	7.16	47.95	0	0	436	4	78.6	2.71	0	Replicate1
Chr1	11150801	11150900	179.05	7.16	472.85	0	0	212	5	357.16	0	0	Replicate1 + Replicate2
Chr1	11152601	11152800	567.22	18.62	94.24	0	0	595	7	126.87	2.71	1.4	Replicate1 + Replicate2
Chr1	11174201	11174300	1297.74	30.08	863.04	0	3.01	1253	19	641.23	0	0	Replicate1 + Replicate2
Chr1	11204401	11204500	615.93	14.32	110.77	0	0	665	4	88.25	0	0	Replicate1
Chr1	11204501	11204600	1352.18	4.3	229.81	0	1.51	1437	13	199.95	0	2.8	Replicate2
Chr1	11228601	11228700	148.97	4.3	61.17	0	0	200	5	57.92	0	0	Replicate2
Chr1	11241601	11241900	2490.92	22.91	1230.08	0	1.51	2452	32	952.87	5.43	2.8	Replicate1 + Replicate2
Chr1	11286601	11286700	307.96	1.43	119.04	0	0	307	5	75.84	0	0	Replicate2
Chr1	11287501	11287700	8458.26	130.34	2519.67	1.56	1.51	9841	121	2552.5	5.43	1.4	Replicate1 + Replicate2
Chr1	11315101	11315200	1403.74	4.3	181.87	0	0	1851	5	179.27	0	0	Replicate2
Chr1	11351501	11351600	554.33	1.43	99.2	0	0	501	9	95.15	0	0	Replicate2
Chr1	11352301	11352400	3613.92	211.99	5677.53	3.11	4.52	5139	207	5281.51	13.57	9.8	Replicate1 + Replicate2
Chr1	11408601	11408700	95.97	5.73	34.72	0	0	106	1	33.1	0	0	Replicate1
Chr1	11410101	11410200	1433.82	7.16	504.27	1.56	0	1351	21	354.4	0	0	Replicate1 + Replicate2
Chr1	11428201	11428400	541.45	12.89	105.81	0	0	605	23	129.62	0	0	Replicate1 + Replicate2
Chr1	11522301	11522400	108.86	4.3	29.76	0	0	139	6	57.92	0	0	Replicate2
Chr1	11536601	11536700	44.4	5.73	11.57	0	0	55	2	15.17	0	0	Replicate1
Chr1	11585801	11586200	1031.32	25.78	127.31	0	0	1042	24	115.84	0	0	Replicate1 + Replicate2
Chr1	11637001	11637100	25.78	1.43	6.61	0	0	31	5	9.65	0	0	Replicate2
Chr1	11644301	11644500	1929.42	25.78	269.49	0	0	2168	36	325.44	0	2.8	Replicate1 + Replicate2
Chr1	11649301	11649400	151.83	4.3	109.12	0	0	157	5	100.67	0	0	Replicate2
Chr1	11661101	11661200	498.47	14.32	74.4	0	0	506	15	46.89	0	1.4	Replicate1 + Replicate2
Chr1	11661401	11661500	370.99	7.16	11.57	0	1.51	321	4	24.82	0	0	Replicate1
Chr1	11661801	11661900	61.59	2.86	29.76	0	0	80	5	17.93	0	0	Replicate2
Chr1	11662201	11662300	4917.39	12.89	163.68	0	0	3863	10	182.03	0	0	Replicate1 + Replicate2
Chr1	11669401	11669500	2046.88	61.59	1068.05	0	1.51	1997	37	816.36	2.71	1.4	Replicate1 + Replicate2
Chr1	11692601	11692800	555.76	11.46	102.5	0	0	654	10	121.36	2.72	0	Replicate1 + Replicate2
Chr1	11693101	11693200	277.88	5.73	51.25	0	0	327	5	60.68	1.36	0	Replicate1 + Replicate2
Chr1	11700401	11700700	542.87	17.18	371.99	0	0	650	21	365.43	0	0	Replicate1 + Replicate2
Chr1	11701101	11701200	405.37	2.86	191.79	0	0	411	5	115.83	0	1.4	Replicate2
Chr1	11701401	11701500	484.15	7.16	114.08	0	0	423	1	104.8	0	0	Replicate1
Chr1	11704001	11704200	938.22	17.19	252.96	0	0	1028	17	273.04	0	0	Replicate1 + Replicate2
Chr1	11706501	11706600	757.73	8.59	385.23	1.56	0	802	15	266.14	0	0	Replicate1 + Replicate2
Chr1	11706801	11706900	289.34	1.43	74.4	0	0	448	5	89.63	0	0	Replicate2
Chr1	11708701	11708800	174.75	4.3	42.99	0	0	116	5	48.26	0	0	Replicate2
Chr1	11720501	11720600	515.66	27.22	95.89	0	0	530	23	78.6	1.36	0	Replicate1 + Replicate2
Chr1	11733301	11733400	310.83	15.76	219.89	0	0	308	11	279.93	4.07	2.8	Replicate1
Chr1	11736101	11736200	753.44	4.3	69.44	0	0	653	8	86.88	0	0	Replicate2
Chr1	11736401	11736700	744.85	11.46	272.8	0	1.51	816	13	330.96	0	0	Replicate1 + Replicate2
Chr1	11740601	11740800	4437.54	11.46	390.18	0	0	5162	13	350.26	4.07	1.4	Replicate1
Chr1	11752301	11752400	173.32	1.43	61.17	0	0	171	6	38.61	0	2.8	Replicate2
Chr1	11752401	11752500	521.39	7.16	386.88	0	0	527	2	299.24	0	0	Replicate1
Chr1	11754701	11754800	1257.64	11.46	497.65	0	0	1293	4	449.55	0	1.4	Replicate1
Chr1	11789501	11789600	472.69	8.59	128.96	0	0	473	1	96.53	1.36	0	Replicate1
Chr1	11789601	11789700	313.69	2.86	85.97	0	0	433	9	55.16	0	0	Replicate2
Chr1	11793901	11794000	555.77	8.59	160.37	0	0	605	7	124.11	1.36	0	Replicate1 + Replicate2
Chr1	11806201	11806300	223.45	5.73	47.95	0	0	227	1	44.13	0	0	Replicate1
Chr1	11822201	11822400	335.18	12.89	147.15	0	1.51	443	10	183.4	4.07	0	Replicate1 + Replicate2
Chr1	11834601	11834700	173.32	1.43	95.89	0	0	152	5	107.56	1.36	0	Replicate2
Chr1	11834901	11835000	209.13	4.3	413.33	0	0	251	9	372.33	1.36	0	Replicate2
Chr1	11835101	11835200	78.78	5.73	82.67	0	0	100	0	85.5	0	0	Replicate1
Chr1	11835701	11835800	179.05	7.16	46.29	0	0	198	3	57.92	0	0	Replicate1
Chr1	11880201	11880300	51.57	7.16	9.92	0	0	62	3	4.14	0	0	Replicate1
Chr1	11887901	11888000	174.75	8.59	76.05	0	0	199	2	81.36	0	0	Replicate1
Chr1	11891901	11892000	140.37	8.59	124	0	0	207	4	161.34	0	0	Replicate1
Chr1	11895701	11896000	1287.72	17.19	1145.76	0	1.51	1356	25	1012.17	2.72	1.4	Replicate1 + Replicate2
Chr1	11899601	11899700	416.83	8.59	282.72	0	0	391	10	213.74	0	1.4	Replicate1 + Replicate2
Chr1	11900801	11900900	343.77	4.3	337.28	0	1.51	309	8	315.79	0	1.4	Replicate2
Chr1	11901301	11901600	1130.15	34.38	1154.02	0	3.01	1305	29	1068.71	2.71	2.8	Replicate1 + Replicate2
Chr1	11957901	11958000	141.81	7.16	21.49	0	0	140	2	8.27	4.07	0	Replicate1
Chr1	11960801	11960900	343.77	2.86	38.03	0	0	257	7	28.96	0	0	Replicate2
Chr1	11982001	11982100	67.32	10.03	38.03	0	0	87	0	34.47	0	0	Replicate1
Chr1	12010101	12010400	667.49	12.89	77.71	0	0	596	7	88.25	1.36	0	Replicate1
Chr1	12022701	12022800	356.66	5.73	31.41	0	0	266	2	35.85	0	0	Replicate1
Chr1	12041101	12041200	466.96	1.43	117.39	0	0	734	6	151.69	0	0	Replicate2
Chr1	12059901	12060000	118.89	2.86	18.19	0	0	151	5	11.03	0	0	Replicate2
Chr1	12062301	12062400	117.46	0	21.49	1.56	0	128	6	33.1	0	0	Replicate2
Chr1	12070701	12070800	169.02	5.73	9.92	0	0	184	3	19.31	0	0	Replicate1
Chr1	12091701	12091800	5.73	4.3	310.83	0	0	2	5	278.55	0	1.4	Replicate2
Chr1	12097401	12097600	1614.3	41.54	982.08	0	0	2104	42	969.42	2.71	0	Replicate1 + Replicate2
Chr1	12138801	12139100	1201.78	25.79	620	0	0	1111	26	471.61	0	0	Replicate1 + Replicate2
Chr1	12142801	12142900	909.57	2.86	110.77	0	0	964	6	124.11	0	0	Replicate2
Chr1	12176101	12176200	476.99	11.46	170.29	0	0	445	1	124.11	0	0	Replicate1
Chr1	12183901	12184000	289.34	4.3	95.89	0	0	308	5	86.88	0	0	Replicate2
Chr1	12240601	12240800	847.98	25.78	519.15	0	0	947	18	460.58	0	1.4	Replicate1 + Replicate2
Chr1	12263201	12263300	54.43	4.3	41.33	1.56	0	50	6	24.82	0	0	Replicate2
Chr1	12264601	12264700	299.37	5.73	44.64	0	0	319	4	66.19	0	0	Replicate1
Chr1	12286601	12286800	1247.61	28.65	335.63	0	0	1451	34	329.57	0	0	Replicate1 + Replicate2
Chr1	12302901	12303000	234.91	10.03	380.27	0	0	216	5	322.68	0	2.8	Replicate1
Chr1	12303001	12303200	766.33	5.73	241.38	0	0	833	12	224.78	1.36	0	Replicate2
Chr1	12328101	12328200	405.37	2.86	190.13	0	0	401	5	114.46	0	1.4	Replicate2
Chr1	12328201	12328300	885.22	5.73	429.87	0	0	797	4	347.5	1.36	0	Replicate1
Chr1	12328401	12328500	28.65	1.43	49.6	0	0	52	5	59.3	0	0	Replicate2
Chr1	12328701	12328800	12831.3	24.35	1453.28	4.67	1.51	11285	32	1358.3	0	1.4	Replicate1 + Replicate2
Chr1	12329001	12329100	75.92	1.43	59.52	0	0	90	8	62.05	0	0	Replicate2
Chr1	12329301	12329400	326.58	11.46	165.33	0	0	303	11	172.37	0	0	Replicate1 + Replicate2
Chr1	12337701	12337800	603.04	10.03	372	0	1.51	808	11	324.06	0	0	Replicate1 + Replicate2
Chr1	12364601	12364700	633.12	2.86	198.4	3.11	3.01	480	5	129.62	1.36	0	Replicate2
Chr1	12364801	12364900	116.02	8.59	138.88	0	0	153	3	107.56	0	0	Replicate1
Chr1	12365101	12365200	12659.5	27.22	1367.3	6.23	0	11101	25	1271.42	0	1.4	Replicate1 + Replicate2
Chr1	12477001	12477100	1607.14	4.3	105.81	0	0	1282	5	79.98	0	0	Replicate2
Chr1	12511201	12511300	186.21	2.86	81.01	0	0	195	5	62.05	0	0	Replicate2
Chr1	12525501	12525700	1395.15	37.24	889.49	0	3.01	1356	23	704.66	0	1.4	Replicate1 + Replicate2
Chr1	12530201	12530300	753.44	8.59	81.01	0	0	1134	4	62.05	0	0	Replicate1
Chr1	12563301	12563400	1001.24	11.46	186.83	1.56	0	685	6	151.69	0	0	Replicate1 + Replicate2
Chr1	12565701	12565800	189.08	7.16	188.48	0	0	236	9	165.48	0	0	Replicate1 + Replicate2
Chr1	12573801	12573900	320.86	12.89	109.12	0	0	389	8	77.22	0	0	Replicate1 + Replicate2
Chr1	12591201	12591300	194.8	7.16	57.87	0	0	198	4	56.54	0	0	Replicate1
Chr1	12593101	12593300	598.74	12.89	471.2	0	0	512	9	493.68	1.36	0	Replicate1 + Replicate2
Chr1	12610801	12610900	359.53	42.97	211.63	1.56	0	551	54	219.26	0	0	Replicate1 + Replicate2
Chr1	12651201	12651300	48.7	0	41.33	0	0	38	5	20.68	0	0	Replicate2
Chr1	12662801	12662900	568.66	7.16	81.01	0	0	538	5	77.22	0	0	Replicate1 + Replicate2
Chr1	12677401	12677500	15.76	5.73	39.68	1.56	0	14	0	57.92	0	0	Replicate1
Chr1	12684501	12684600	123.19	4.3	92.59	0	3.01	92	6	89.63	0	0	Replicate2
Chr1	12713601	12713700	1356.47	41.54	1307.78	1.56	1.51	1330	45	1028.72	2.71	4.2	Replicate1 + Replicate2
Chr1	12723501	12723600	124.62	4.3	165.33	0	0	108	5	169.61	0	0	Replicate2
Chr1	12724601	12724700	53	5.73	19.84	0	0	67	0	31.72	0	0	Replicate1
Chr1	12725401	12725500	106	0	92.59	0	0	69	5	95.15	0	0	Replicate2
Chr1	12728401	12728500	678.95	5.73	408.37	0	1.51	615	4	336.47	0	0	Replicate1
Chr1	12730301	12730400	156.13	7.16	281.07	0	1.51	155	4	282.69	0	0	Replicate1
Chr1	12733501	12733800	349.5	20.05	545.6	0	3.02	440	8	610.89	1.36	2.8	Replicate1
Chr1	12733901	12734000	197.67	2.86	132.27	0	0	159	6	166.86	2.71	0	Replicate2
Chr1	12761501	12761600	48.7	10.03	59.52	0	0	42	5	100.67	0	1.4	Replicate1 + Replicate2
Chr1	12818701	12818800	167.59	7.16	97.55	0	0	168	0	103.42	0	0	Replicate1
Chr1	12820601	12820700	40.11	5.73	127.31	0	0	49	2	119.97	0	0	Replicate1
Chr1	12839501	12839600	435.45	14.32	530.72	0	1.51	413	17	547.46	0	0	Replicate1 + Replicate2
Chr1	12854201	12854300	177.62	0	18.19	0	0	171	5	22.06	0	0	Replicate2
Chr1	12874201	12874300	724.79	8.59	252.96	0	0	873	3	273.04	0	0	Replicate1
Chr1	12875501	12875600	529.98	14.32	92.59	0	0	633	4	71.71	0	0	Replicate1
Chr1	12876301	12876700	13952.9	34.37	1949.27	6.23	0	12148	45	1769.23	2.71	1.4	Replicate1 + Replicate2
Chr1	12895301	12895400	140.37	2.86	74.4	0	0	145	8	66.19	0	0	Replicate2
Chr1	12896401	12896500	173.32	25.78	165.33	0	0	183	29	162.72	0	0	Replicate1 + Replicate2
Chr1	12906601	12906700	181.91	7.16	203.36	0	1.51	180	4	259.25	0	2.8	Replicate1
Chr1	12907601	12907700	20.05	7.16	795.25	0	1.51	21	9	751.55	1.36	0	Replicate1 + Replicate2
Chr1	12916001	12916200	317.99	2.86	47.94	0	0	323	11	34.47	0	0	Replicate2
Chr1	12942601	12942700	1143.05	11.46	107.47	0	0	1175	2	64.81	0	0	Replicate1
Chr1	12980301	12980400	70.19	5.73	41.33	0	0	86	1	44.13	0	0	Replicate1
Chr1	12993101	12993200	159	12.89	51.25	0	0	152	3	62.05	0	0	Replicate1
Chr1	12993501	12993600	461.23	5.73	191.79	0	0	452	8	195.82	0	0	Replicate1 + Replicate2
Chr1	13008801	13008900	403.93	4.3	94.24	1.56	0	373	5	85.5	1.36	0	Replicate2
Chr1	13016401	13016600	749.14	7.16	376.96	0	0	763	11	365.43	0	1.4	Replicate2
Chr1	13017101	13017200	60.16	2.86	33.07	0	0	76	5	44.13	0	0	Replicate2
Chr1	13027901	13028000	85.94	5.73	46.29	0	0	104	8	42.75	0	0	Replicate1 + Replicate2
Chr1	13028501	13028600	25.78	2.86	16.53	0	0	35	5	11.03	0	0	Replicate2
Chr1	13030301	13030400	358.1	2.86	120.69	0	1.51	543	5	146.17	0	0	Replicate2
Chr1	13043301	13043400	623.09	11.46	62.83	0	0	767	19	68.95	0	0	Replicate1 + Replicate2
Chr1	13049901	13050000	148.97	0	6.61	0	0	215	5	11.03	0	0	Replicate2
Chr1	13059501	13059900	726.23	17.18	408.37	0	1.51	828	14	416.46	1.36	0	Replicate1 + Replicate2
Chr1	13060101	13060200	237.78	10.03	274.45	0	0	252	2	224.77	2.71	0	Replicate1
Chr1	13085501	13085600	408.23	5.73	213.28	0	0	441	7	180.65	0	0	Replicate1 + Replicate2
Chr1	13087501	13087600	368.12	7.16	94.24	0	0	444	10	99.29	2.71	0	Replicate1 + Replicate2
Chr1	13102801	13102900	5.73	5.73	234.77	1.56	0	5	3	235.81	0	0	Replicate1
Chr1	13134801	13134900	58.73	8.59	105.81	0	0	64	2	82.74	0	1.4	Replicate1
Chr1	13138401	13138500	176.18	5.73	165.33	0	1.51	166	2	115.83	1.36	1.4	Replicate1
Chr1	13148301	13148400	442.61	18.62	105.81	0	1.51	446	16	92.39	0	0	Replicate1 + Replicate2
Chr1	13150301	13150400	379.58	2.86	24.8	0	0	437	5	41.37	0	0	Replicate2
Chr1	13151401	13151500	144.67	21.49	100.85	0	0	197	30	115.83	0	0	Replicate1 + Replicate2
Chr1	13152001	13152100	140.37	5.73	64.48	0	0	165	3	57.92	2.71	0	Replicate1
Chr1	13152801	13152900	346.64	8.59	135.57	0	0	503	2	79.98	1.36	0	Replicate1
Chr1	13156201	13156300	210.56	5.73	13.23	1.56	0	135	1	12.41	0	1.4	Replicate1
Chr1	13167101	13167300	2682.86	34.38	605.12	3.11	0	3021	38	550.22	2.71	0	Replicate1 + Replicate2
Chr1	13171301	13171400	263.56	4.3	8.27	0	0	332	5	6.89	0	0	Replicate2
Chr1	13173101	13173200	124.62	8.59	52.91	1.56	0	119	6	49.64	0	1.4	Replicate1 + Replicate2
Chr1	13180001	13180100	242.07	5.73	152.11	0	0	228	2	169.61	1.36	1.4	Replicate1
Chr1	13241501	13241600	171.89	4.3	42.99	0	0	173	5	38.61	0	0	Replicate2
Chr1	13242101	13242200	87.38	5.73	69.44	0	0	113	5	66.19	0	0	Replicate1 + Replicate2
Chr1	13256901	13257200	1227.56	45.84	638.18	0	0	1378	44	606.75	1.36	1.4	Replicate1 + Replicate2
Chr1	13259401	13259500	1186.02	7.16	372	0	0	1108	11	369.57	1.36	0	Replicate1 + Replicate2
Chr1	13261401	13261500	933.92	5.73	138.88	0	0	637	5	104.8	0	0	Replicate1 + Replicate2
Chr1	13287201	13287300	163.29	5.73	276.11	0	0	227	5	306.13	0	0	Replicate1 + Replicate2
Chr1	13313601	13313700	723.36	17.19	370.35	0	0	817	12	314.41	0	0	Replicate1 + Replicate2
Chr1	13339501	13339600	14.32	5.73	21.49	0	0	24	2	35.85	0	0	Replicate1
Chr1	13355401	13355500	323.72	7.16	85.97	0	0	374	5	79.98	0	0	Replicate1 + Replicate2
Chr1	13359201	13359300	223.45	7.16	411.68	0	0	179	9	346.12	1.36	0	Replicate1 + Replicate2
Chr1	13377401	13377500	401.07	4.3	119.04	0	0	590	6	114.46	0	0	Replicate2
Chr1	13400301	13400400	373.85	7.16	72.75	0	0	373	0	27.58	0	0	Replicate1
Chr1	13407401	13407500	508.5	8.59	317.44	0	0	671	13	348.88	1.36	0	Replicate1 + Replicate2
Chr1	13407901	13408000	534.28	5.73	26.45	0	0	592	0	15.17	0	0	Replicate1
Chr1	13445301	13445400	88.81	4.3	61.17	0	1.51	80	5	59.3	0	0	Replicate2
Chr1	13486801	13487500	3864.59	51.55	5404.75	3.11	10.55	3968	58	4095.58	4.07	0	Replicate1 + Replicate2
Chr1	13489301	13489500	356.67	8.59	244.69	1.56	0	252	11	253.73	0	0	Replicate1 + Replicate2
Chr1	13490301	13490400	1801.95	10.03	259.57	0	0	1522	13	310.27	1.36	0	Replicate1 + Replicate2
Chr1	13495901	13496000	363.83	5.73	158.72	0	0	452	7	147.55	0	0	Replicate1 + Replicate2
Chr1	13508001	13508100	1667.3	11.46	365.39	0	0	1490	13	328.2	0	0	Replicate1 + Replicate2
Chr1	13513601	13513700	42.97	5.73	33.07	0	0	70	0	23.44	0	0	Replicate1
Chr1	13514101	13514200	93.11	0	59.52	0	0	127	5	102.04	0	0	Replicate2
Chr1	13515501	13515600	42.97	0	34.72	1.56	0	45	8	52.4	0	0	Replicate2
Chr1	13516401	13516500	913.86	4.3	231.47	0	0	851	12	228.91	0	0	Replicate2
Chr1	13544701	13544800	249.24	5.73	26.45	0	0	199	5	23.44	1.36	0	Replicate1 + Replicate2
Chr1	13622001	13622100	156.13	5.73	62.83	0	0	175	0	46.89	0	0	Replicate1
Chr1	13639101	13639300	488.45	18.62	208.32	0	0	500	19	175.13	0	1.4	Replicate1 + Replicate2
Chr1	13639501	13639800	2049.75	12.89	138.88	1.56	0	2234	7	157.21	2.71	0	Replicate1 + Replicate2
Chr1	13640101	13640200	262.13	0	31.41	0	0	216	8	26.2	0	0	Replicate2
Chr1	13652601	13652700	211.99	1.43	262.88	1.56	1.51	174	5	217.88	0	0	Replicate2
Chr1	13659401	13659500	210.56	7.16	112.43	0	0	180	6	88.25	0	0	Replicate1 + Replicate2
Chr1	13660001	13660100	1673.03	7.16	309.17	6.23	1.51	1527	13	267.52	1.36	0	Replicate2
Chr1	13660101	13660300	2022.53	30.08	2615.57	3.12	4.52	1964	26	2449.08	13.57	5.6	Replicate1
Chr1	13660401	13660500	126.05	2.86	251.31	0	1.51	138	9	209.61	0	1.4	Replicate2
Chr1	13661501	13661600	93.11	5.73	34.72	0	0	128	0	37.23	0	0	Replicate1
Chr1	13664701	13664800	369.56	5.73	160.37	0	0	327	5	175.13	2.71	0	Replicate1
Chr1	13666501	13666600	223.45	7.16	94.24	0	0	191	4	75.84	0	0	Replicate1
Chr1	13666901	13667000	272.15	5.73	142.19	0	0	363	7	140.66	1.36	0	Replicate1 + Replicate2
Chr1	13667201	13667300	1761.84	11.46	552.21	0	0	1624	15	475.75	0	0	Replicate1 + Replicate2
Chr1	13682401	13682600	236.34	12.89	150.45	0	0	216	12	136.52	0	0	Replicate1 + Replicate2
Chr1	13712101	13712400	507.06	18.62	486.08	0	1.51	485	7	359.92	0	0	Replicate1
Chr1	13741301	13741400	47.27	0	72.75	0	0	44	6	88.25	0	0	Replicate2
Chr1	13775101	13775200	157.56	5.73	259.57	0	0	171	4	173.75	0	0	Replicate1
Chr1	13785301	13785400	369.56	2.86	168.64	0	0	367	11	166.86	0	0	Replicate2
Chr1	13788401	13788500	98.83	11.46	128.96	0	0	107	3	108.94	0	0	Replicate1
Chr1	13795001	13795100	117.46	10.03	171.95	0	0	121	3	155.83	0	0	Replicate1
Chr1	13796601	13796700	131.78	2.86	248	0	0	157	6	217.88	0	1.4	Replicate2
Chr1	13796701	13796800	303.67	5.73	163.68	0	0	290	3	131	0	0	Replicate1
Chr1	13799401	13799500	186.21	7.16	277.76	0	0	205	4	204.09	0	0	Replicate1
Chr1	13799701	13799800	285.05	5.73	378.61	1.56	0	332	8	296.48	1.36	2.8	Replicate1
Chr1	13811001	13811100	2455.11	32.94	1061.44	0	1.51	2320	33	746.03	2.71	0	Replicate1 + Replicate2
Chr1	13812401	13812500	578.69	5.73	84.32	0	0	474	1	60.68	0	0	Replicate1
Chr1	13854401	13854500	77.35	5.73	11.57	0	0	69	5	8.27	0	0	Replicate1 + Replicate2
Chr1	13863001	13863100	71.62	0	105.81	0	0	68	7	85.5	0	0	Replicate2
Chr1	13870201	13870300	2290.39	58.73	826.66	0	0	1844	18	597.1	5.43	1.4	Replicate1 + Replicate2
Chr1	13883601	13883700	95.97	4.3	77.71	0	0	190	5	84.12	1.36	0	Replicate2
Chr1	13883901	13884100	3202.82	42.98	3782.82	9.34	3.02	2497	40	3123.39	10.85	9.8	Replicate1 + Replicate2
Chr1	13884201	13884300	120.32	2.86	292.64	0	1.51	141	9	210.98	0	1.4	Replicate2
Chr1	13885401	13885500	48.7	5.73	39.68	0	0	47	0	30.34	0	0	Replicate1
Chr1	13888101	13888200	363.83	5.73	145.49	0	0	315	2	158.58	0	0	Replicate1
Chr1	13890301	13890400	117.46	5.73	110.77	0	0	214	5	117.21	1.36	0	Replicate1 + Replicate2
Chr1	13890601	13890800	3105.42	44.4	3096.69	14.01	3.01	2713	44	2451.84	5.43	4.2	Replicate1 + Replicate2
Chr1	13896301	13896400	233.48	10.03	11.57	0	0	184	3	12.41	0	0	Replicate1
Chr1	13904801	13904900	383.88	8.59	418.29	0	3.01	234	2	365.43	0	0	Replicate1
Chr1	13905901	13906000	164.72	5.73	89.28	0	0	214	0	49.64	0	0	Replicate1
Chr1	13906201	13906400	900.97	4.29	221.55	0	0	760	10	198.57	0	0	Replicate2
Chr1	13920801	13920900	44.4	2.86	81.01	0	0	56	6	79.98	0	0	Replicate2
Chr1	13979501	13979600	1049.94	4.3	603.47	0	0	1213	6	632.95	0	1.4	Replicate2
Chr1	14012901	14013000	315.13	2.86	34.72	0	0	263	5	33.1	0	1.4	Replicate2
Chr1	14013301	14013400	1226.13	27.22	811.78	0	3.01	1188	15	605.37	0	0	Replicate1 + Replicate2
Chr1	14024401	14024500	166.16	4.3	64.48	0	0	193	7	91.01	0	0	Replicate2
Chr1	14030801	14030900	151.83	4.3	85.97	1.56	0	179	9	68.95	0	0	Replicate2
Chr1	14059501	14059600	422.55	1.43	833.28	1.56	0	412	5	675.7	0	0	Replicate2
Chr1	14060201	14060300	151.83	4.3	234.77	1.56	0	183	7	159.96	0	0	Replicate2
Chr1	14060401	14060500	71.62	7.16	150.45	1.56	0	76	4	93.77	0	0	Replicate1
Chr1	14077501	14077600	54.43	5.73	13.23	0	0	66	0	16.55	0	0	Replicate1
Chr1	14083701	14083800	345.21	1.43	451.36	0	0	349	5	373.7	0	1.4	Replicate2
Chr1	14084201	14084300	21.49	2.86	74.4	1.56	0	36	5	62.05	0	0	Replicate2
Chr1	14084501	14084600	174.75	5.73	300.91	0	0	201	2	264.76	0	0	Replicate1
Chr1	14092401	14092500	107.43	1.43	34.72	0	0	111	5	45.51	0	1.4	Replicate2
Chr1	14093901	14094000	85.94	7.16	165.33	0	0	84	5	115.83	0	0	Replicate1 + Replicate2
Chr1	14124001	14124100	8.59	5.73	13.23	0	0	11	1	9.65	0	0	Replicate1
Chr1	14153101	14153200	159	4.3	52.91	0	0	139	6	42.75	0	0	Replicate2
Chr1	14164201	14164500	1469.62	22.92	122.35	0	0	1577	22	117.21	0	0	Replicate1 + Replicate2
Chr1	14169401	14169600	1135.89	18.62	410.03	1.56	0	1035	19	290.96	0	1.4	Replicate1 + Replicate2
Chr1	14178301	14178400	98.83	5.73	89.28	0	0	89	2	53.78	0	0	Replicate1
Chr1	14178801	14178900	183.35	5.73	158.72	0	0	223	2	155.83	0	1.4	Replicate1
Chr1	14188801	14188900	114.59	4.3	42.99	0	0	151	9	68.95	0	0	Replicate2
Chr1	14197201	14197300	166.16	4.3	155.41	1.56	1.51	214	7	137.9	0	1.4	Replicate2
Chr1	14206701	14206800	170.45	7.16	252.96	1.56	1.51	239	8	260.63	0	1.4	Replicate1 + Replicate2
Chr1	14245201	14245300	171.89	5.73	262.88	0	0	188	4	175.13	0	0	Replicate1
Chr1	14248101	14248200	177.62	1.43	246.35	0	0	184	5	208.23	0	1.4	Replicate2
Chr1	14254901	14255000	150.4	5.73	216.59	0	0	149	4	132.38	0	1.4	Replicate1
Chr1	14260901	14261000	42.97	4.3	89.28	0	0	50	7	78.6	0	1.4	Replicate2
Chr1	14297201	14297300	51.57	5.73	13.23	0	0	53	0	19.31	0	0	Replicate1
Chr1	14297601	14297700	478.42	8.59	246.35	0	0	670	7	271.66	0	0	Replicate1 + Replicate2
Chr1	14298601	14298700	359.53	5.73	92.59	1.56	0	380	6	85.5	1.36	0	Replicate1 + Replicate2
Chr1	14309001	14309100	375.29	5.73	84.32	0	0	321	0	45.51	0	0	Replicate1
Chr1	14316501	14316600	134.64	5.73	152.11	0	0	97	1	114.46	0	0	Replicate1
Chr1	14330001	14330100	312.26	1.43	66.13	0	0	430	8	57.92	0	0	Replicate2
Chr1	14338001	14338100	209.13	5.73	314.13	1.56	0	245	6	226.15	1.36	1.4	Replicate1 + Replicate2
Chr1	14338301	14338400	160.43	5.73	252.96	0	0	179	4	182.03	0	0	Replicate1
Chr1	14340301	14340400	482.72	1.43	1026.72	1.56	0	455	7	810.84	0	0	Replicate2
Chr1	14363201	14363300	312.26	5.73	186.83	0	0	252	2	140.66	0	0	Replicate1
Chr1	14383501	14383600	25.78	1.43	49.6	0	0	40	6	59.3	0	0	Replicate2
Chr1	14387601	14387700	204.83	5.73	62.83	0	0	158	2	66.19	0	0	Replicate1
Chr1	14410301	14410400	224.89	5.73	82.67	0	0	218	1	63.43	0	1.4	Replicate1
Chr1	14420601	14420700	54.43	1.43	26.45	0	0	46	5	30.34	0	0	Replicate2
Chr1	14429101	14429200	97.4	1.43	77.71	0	0	93	7	99.29	0	0	Replicate2
Chr1	14429801	14429900	117.46	5.73	89.28	0	1.51	117	1	100.67	0	0	Replicate1
Chr1	14432901	14433000	302.23	1.43	692.74	1.56	0	301	5	548.84	1.36	0	Replicate2
Chr1	14433601	14433700	127.48	5.73	109.12	0	0	96	1	78.6	0	0	Replicate1
Chr1	14439501	14439600	290.77	5.73	314.13	1.56	0	315	6	239.94	4.07	1.4	Replicate1
Chr1	14440701	14440800	484.15	0	171.95	1.56	0	439	5	125.49	0	0	Replicate2
Chr1	14442801	14442900	121.75	8.59	185.17	1.56	0	136	5	155.83	0	0	Replicate1 + Replicate2
Chr1	14450401	14450600	446.91	2.86	836.58	0	1.51	359	11	688.11	0	0	Replicate2
Chr1	14473701	14473800	313.69	5.73	186.83	0	0	245	2	139.28	0	0	Replicate1
Chr1	14484601	14484700	203.4	5.73	145.49	0	0	194	2	75.84	0	0	Replicate1
Chr1	14488401	14488500	111.73	1.43	143.84	0	0	120	5	114.46	0	0	Replicate2
Chr1	14488601	14488700	244.94	7.16	238.08	0	0	249	2	173.75	0	0	Replicate1
Chr1	14491501	14491600	83.08	12.89	148.8	0	0	95	3	114.46	0	0	Replicate1
Chr1	14498101	14498200	432.58	2.86	707.62	1.56	0	428	6	586.07	0	0	Replicate2
Chr1	14501001	14501100	224.89	7.16	236.43	0	0	223	2	176.51	0	0	Replicate1
Chr1	14600301	14600400	123.19	7.16	170.29	1.56	1.51	168	1	159.96	0	0	Replicate1
Chr1	14610501	14610600	110.29	2.86	46.29	0	0	91	9	37.23	0	0	Replicate2
Chr1	14667001	14667100	199.1	7.16	64.48	0	0	153	2	67.57	0	0	Replicate1
Chr1	14674501	14674600	252.1	5.73	94.24	0	0	199	0	88.25	0	0	Replicate1
Chr1	14721201	14721300	15.76	2.86	8.27	0	0	24	6	12.41	0	0	Replicate2
Chr1	14723101	14723200	20.05	2.86	8.27	0	0	24	6	8.27	0	0	Replicate2
Chr1	14738301	14738400	83.08	1.43	82.67	0	0	100	5	67.57	0	0	Replicate2
Chr1	14744801	14744900	44.4	4.3	85.97	1.56	0	62	6	70.33	0	0	Replicate2
Chr1	14807401	14807500	41.54	12.89	114.08	0	0	48	3	79.98	0	0	Replicate1
Chr1	14830401	14830500	210.56	5.73	87.63	0	0	159	0	88.25	0	0	Replicate1
Chr1	14865501	14865600	714.76	5.73	66.13	0	0	856	8	113.08	0	0	Replicate1 + Replicate2
Chr1	14889501	14889600	37.24	0	77.71	0	0	38	5	60.68	0	0	Replicate2
Chr1	14906901	14907000	64.46	2.86	82.67	0	0	71	6	59.3	0	0	Replicate2
Chr1	14960601	14960700	31.51	5.73	29.76	0	0	40	1	13.79	0	0	Replicate1
Chr1	14962901	14963000	31.51	5.73	31.41	0	0	47	1	15.17	0	0	Replicate1
Chr1	14966801	14966900	25.78	5.73	28.11	0	0	31	1	13.79	0	0	Replicate1
Chr1	14968301	14968400	37.24	5.73	33.07	0	0	47	1	17.93	0	0	Replicate1
Chr1	15041001	15041100	186.21	5.73	299.25	0	0	203	2	262.01	0	0	Replicate1
Chr1	15041301	15041400	124.62	2.86	147.15	0	0	136	5	133.76	0	0	Replicate2
Chr1	15041801	15041900	452.63	1.43	443.09	0	3.01	526	7	355.78	2.71	0	Replicate2
Chr1	15042201	15042300	408.23	2.86	267.84	0	0	426	6	238.56	1.36	1.4	Replicate2
Chr1	15042901	15043000	58.73	5.73	95.89	0	0	63	1	139.28	0	2.8	Replicate1
Chr1	15050701	15050800	201.97	5.73	305.87	0	0	220	2	273.04	0	0	Replicate1
Chr1	15051001	15051100	127.48	2.86	142.19	0	0	142	5	113.08	0	0	Replicate2
Chr1	15051501	15051600	385.31	1.43	368.69	0	3.01	444	5	282.69	1.36	0	Replicate2
Chr1	15052701	15052800	53	5.73	90.93	0	0	56	1	125.49	0	0	Replicate1
Chr1	15061101	15061200	286.48	5.73	135.57	0	0	311	3	128.25	0	0	Replicate1
Chr1	15063001	15063100	88.81	5.73	92.59	0	0	87	2	91.01	0	0	Replicate1
Chr1	15064601	15064700	534.28	1.43	1013.49	3.11	0	487	6	831.53	0	0	Replicate2
Chr1	15081901	15086100	303860	1899.32	108283	266.13	301.34	274136	1967	97301.1	462.68	313.59	Replicate1 + Replicate2
Chr1	15094701	15094800	38.67	5.73	23.15	0	0	30	3	20.68	1.36	2.8	Replicate1
Chr1	15100301	15100400	44.4	5.73	14.88	1.56	0	25	5	16.55	2.71	0	Replicate1
Chr1	15178801	15178900	71.62	7.16	24.8	0	0	53	0	26.2	0	0	Replicate1
Chr1	15180401	15180700	442.61	10.03	545.6	3.12	0	458	11	427.48	0	0	Replicate1 + Replicate2
Chr1	15186701	15186800	391.04	5.73	243.04	0	1.51	424	4	216.5	0	0	Replicate1
Chr1	15188401	15188500	272.15	0	130.61	0	0	268	5	165.48	0	0	Replicate2
Chr1	15188701	15188800	70.19	5.73	29.76	0	0	56	0	23.44	0	0	Replicate1
Chr1	15190001	15190100	226.32	7.16	239.73	0	0	201	5	177.89	0	1.4	Replicate1 + Replicate2
Chr1	15191901	15192000	330.88	1.43	644.8	0	1.51	311	7	591.58	0	0	Replicate2
Chr1	15192601	15192900	525.68	11.46	694.4	3.12	0	535	14	540.55	2.71	0	Replicate2
Chr1	15212701	15212800	50.13	5.73	49.6	0	0	36	1	30.34	0	0	Replicate1
Chr1	15240701	15240800	233.48	7.16	1000.26	0	0	212	8	695.01	5.43	5.6	Replicate1
Chr1	15244001	15244100	187.64	5.73	1087.89	0	0	169	9	744.65	5.43	5.6	Replicate1
Chr1	15272601	15272700	53	7.16	16.53	1.56	0	55	10	17.93	1.36	8.4	Replicate1
Chr1	15319501	15319600	50.13	7.16	8.27	3.11	0	34	3	8.27	2.71	2.8	Replicate1
Chr1	15337801	15337900	203.4	5.73	978.77	0	0	183	8	678.46	5.43	5.6	Replicate1
Chr1	15341201	15341300	247.8	7.16	912.64	0	0	259	8	632.95	5.43	2.8	Replicate1
Chr1	15370701	15370800	51.57	5.73	16.53	0	0	54	10	19.31	1.36	8.4	Replicate1
Chr1	15445301	15445400	55.86	4.3	104.16	0	0	78	10	86.88	0	1.4	Replicate2
Chr1	15455601	15455700	58.73	0	24.8	0	0	68	5	24.82	0	0	Replicate2
Chr1	15457201	15457300	134.64	11.46	190.13	0	0	147	2	144.79	0	0	Replicate1
Chr1	15462601	15462700	101.7	1.43	36.37	0	0	96	5	42.75	0	1.4	Replicate2
Chr1	15476501	15476600	111.73	1.43	39.68	0	0	117	5	51.02	0	1.4	Replicate2
Chr1	15483401	15483500	94.54	1.43	38.03	0	0	91	5	49.64	0	1.4	Replicate2
Chr1	15485001	15485100	147.54	11.46	186.83	0	0	155	3	146.17	0	0	Replicate1
Chr1	15493201	15493300	180.48	5.73	87.63	0	0	167	1	63.43	0	0	Replicate1
Chr1	15504701	15504800	53	7.16	137.23	0	0	75	4	100.67	0	0	Replicate1
Chr1	15513801	15513900	147.54	5.73	178.56	0	0	153	4	113.08	0	0	Replicate1
Chr1	15539001	15539100	249.24	8.59	302.56	0	0	261	6	242.7	0	0	Replicate1 + Replicate2
Chr1	15544601	15544700	45.84	1.43	56.21	0	0	67	6	57.92	0	1.4	Replicate2
Chr1	15553101	15553200	10.03	5.73	21.49	0	0	16	1	12.41	0	0	Replicate1
Chr1	15558601	15558700	11.46	5.73	16.53	0	0	15	1	12.41	0	0	Replicate1
Chr1	15595001	15595100	143.24	5.73	115.73	0	0	170	0	74.47	0	0	Replicate1
Chr1	15597701	15597800	350.94	10.03	190.13	0	0	422	2	137.9	0	0	Replicate1
Chr1	15616301	15616400	47.27	2.86	74.4	0	0	56	6	67.57	0	0	Replicate2
Chr1	15617001	15617100	181.91	5.73	155.41	0	0	225	2	151.69	0	1.4	Replicate1
Chr1	15617201	15617300	449.77	1.43	671.25	1.56	0	463	5	562.63	0	0	Replicate2
Chr1	15634901	15635000	552.9	11.46	400.11	0	3.01	721	11	333.71	0	0	Replicate1 + Replicate2
Chr1	15645901	15646000	53	4.3	434.83	0	1.51	38	8	393.01	0	0	Replicate2
Chr1	15662901	15663000	88.81	5.73	29.76	0	0	101	3	28.96	0	0	Replicate1
Chr1	15663201	15663300	154.7	17.19	47.95	0	0	207	28	59.3	0	0	Replicate1 + Replicate2
Chr1	15673601	15673700	4.3	5.73	42.99	0	0	10	0	26.2	0	0	Replicate1
Chr1	15674001	15674100	64.46	10.03	219.89	1.56	0	103	1	227.53	0	1.4	Replicate1
Chr1	15674301	15674500	244.94	18.62	140.54	0	0	298	33	121.35	0	0	Replicate1 + Replicate2
Chr1	15682301	15682400	63.03	2.86	61.17	0	0	67	5	81.36	0	1.4	Replicate2
Chr1	15688501	15688600	903.84	27.22	717.54	0	0	1030	16	552.97	1.36	0	Replicate1 + Replicate2
Chr1	15704901	15705000	446.91	0	616.69	0	0	413	5	449.55	0	0	Replicate2
Chr1	15741701	15741800	118.89	5.73	44.64	0	0	139	0	51.02	0	0	Replicate1
Chr1	15764601	15764700	30.08	5.73	23.15	0	0	27	0	26.2	0	0	Replicate1
Chr1	15784501	15784600	100.27	1.43	120.69	0	0	104	8	102.04	0	0	Replicate2
Chr1	15785101	15785200	383.88	1.43	543.95	0	3.01	365	7	446.79	1.36	1.4	Replicate2
Chr1	15790401	15790500	140.37	4.3	173.6	1.56	0	152	7	142.04	0	0	Replicate2
Chr1	15807101	15807200	1680.19	4.3	238.08	0	0	1446	13	188.92	0	0	Replicate2
Chr1	15809201	15809300	1673.03	4.3	246.35	0	0	1421	13	195.82	0	0	Replicate2
Chr1	15821501	15821600	50.13	2.86	85.97	0	0	71	6	70.33	0	0	Replicate2
Chr1	15824301	15824400	189.08	7.16	295.95	0	0	210	5	194.44	0	0	Replicate1 + Replicate2
Chr1	15825501	15825600	68.75	5.73	29.76	0	0	60	0	31.72	0	0	Replicate1
Chr1	15827501	15827600	373.85	5.73	183.52	0	1.51	409	2	162.72	0	0	Replicate1
Chr1	15834301	15834400	190.51	5.73	158.72	0	0	235	1	158.58	0	1.4	Replicate1
Chr1	15834501	15834600	369.56	0	624.96	0	1.51	292	6	514.36	0	0	Replicate2
Chr1	15836501	15836600	187.64	7.16	295.95	0	0	209	5	194.44	0	0	Replicate1 + Replicate2
Chr1	15837701	15837800	121.75	5.73	33.07	0	0	89	0	41.37	0	0	Replicate1
Chr1	15839501	15839800	856.57	15.75	648.11	0	1.51	999	9	592.97	1.36	0	Replicate1
Chr1	15870001	15870100	91.67	1.43	67.79	0	0	101	6	73.09	0	1.4	Replicate2
Chr1	15910501	15910600	74.48	5.73	1086.24	0	0	55	9	739.14	5.43	5.6	Replicate1
Chr1	15935501	15935600	770.63	8.59	125.65	0	0	875	10	124.11	0	0	Replicate1 + Replicate2
Chr1	15939701	15939900	1223.26	25.79	347.2	1.56	0	908	21	303.38	0	0	Replicate1 + Replicate2
Chr1	15940301	15940500	13147.9	27.22	1499.57	3.11	0	7536	34	1446.55	0	1.4	Replicate1 + Replicate2
Chr1	16003801	16003900	458.36	22.92	486.08	0	0	485	9	326.82	0	0	Replicate1 + Replicate2
Chr1	16004501	16004600	229.18	1.43	87.63	0	0	171	9	103.42	0	0	Replicate2
Chr1	16005801	16005900	618.79	1.43	61.17	0	0	649	5	66.19	0	0	Replicate2
Chr1	16012701	16012900	3580.97	38.68	2891.68	4.67	6.03	3337	41	2671.09	14.93	11.2	Replicate1 + Replicate2
Chr1	16013401	16013600	1376.53	12.89	358.78	3.11	1.51	1295	21	295.11	0	4.2	Replicate1 + Replicate2
Chr1	16017001	16017100	141.81	5.73	99.2	0	0	113	3	77.22	0	0	Replicate1
Chr1	16019001	16019100	127.48	2.86	257.92	0	1.51	136	9	197.19	0	1.4	Replicate2
Chr1	16019301	16019400	1390.85	17.19	1740.96	1.56	1.51	1306	21	1741.66	2.71	5.6	Replicate1 + Replicate2
Chr1	16038601	16038700	476.99	2.86	150.45	0	0	467	8	137.9	0	0	Replicate2
Chr1	16045601	16045700	146.1	7.16	87.63	0	0	193	0	78.6	0	0	Replicate1
Chr1	16050501	16050600	289.34	1.43	147.15	0	0	298	6	104.8	0	0	Replicate2
Chr1	16110201	16110300	183.35	5.73	143.84	0	0	207	2	100.67	0	0	Replicate1
Chr1	16116501	16116600	176.18	24.35	195.09	0	0	202	33	136.52	1.36	0	Replicate1 + Replicate2
Chr1	16117801	16117900	191.94	2.86	54.56	0	0	276	7	39.99	0	0	Replicate2
Chr1	16118101	16118200	1571.33	0	72.75	0	0	1106	5	31.72	0	0	Replicate2
Chr1	16119801	16119900	54.43	4.3	193.44	0	0	101	7	186.16	0	0	Replicate2
Chr1	16123801	16123900	1579.93	1.43	77.71	0	0	1115	7	38.61	0	0	Replicate2
Chr1	16142501	16142600	233.48	7.16	85.97	1.56	0	194	11	78.6	0	0	Replicate1 + Replicate2
Chr1	16174401	16174500	216.29	10.03	375.31	1.56	1.51	306	4	364.05	0	1.4	Replicate1
Chr1	16198101	16198200	213.43	5.73	841.54	0	0	174	10	591.58	5.43	2.8	Replicate1
Chr1	16252701	16252800	1717.43	12.89	360.43	0	0	1969	6	289.59	0	0	Replicate1 + Replicate2
Chr1	16253901	16254000	439.74	1.43	124	0	0	483	6	88.25	0	0	Replicate2
Chr1	16258601	16258700	302.23	1.43	112.43	0	0	302	5	79.98	0	0	Replicate2
Chr1	16259701	16259800	4047.93	44.4	499.31	0	0	3973	25	499.19	0	0	Replicate1 + Replicate2
Chr1	16286901	16287000	455.5	5.73	1016.8	1.56	1.51	604	8	889.44	2.71	0	Replicate2
Chr1	16287101	16287200	70.19	5.73	76.05	0	0	79	3	82.74	0	0	Replicate1
Chr1	16290301	16290400	117.46	4.3	44.64	0	0	147	9	68.95	0	0	Replicate2
Chr1	16290601	16290700	48.7	5.73	18.19	0	0	26	0	20.68	0	0	Replicate1
Chr1	16294401	16294600	953.97	20.05	307.52	0	0	916	16	277.17	0	2.8	Replicate1 + Replicate2
Chr1	16295601	16295700	338.04	10.03	181.87	0	0	323	7	197.19	1.36	0	Replicate1 + Replicate2
Chr1	16298801	16298900	283.61	7.16	942.4	0	7.53	350	8	848.07	2.71	0	Replicate2
Chr1	16302201	16302300	107.43	4.3	47.95	0	0	143	9	66.19	0	0	Replicate2
Chr1	16302601	16302700	77.35	8.59	28.11	0	0	54	1	22.06	0	0	Replicate1
Chr1	16305401	16305600	953.97	20.05	307.52	0	0	916	16	277.17	0	2.8	Replicate1 + Replicate2
Chr1	16306601	16306700	359.53	8.59	218.24	0	0	358	5	224.77	1.36	0	Replicate1 + Replicate2
Chr1	16326101	16326200	962.57	10.03	190.13	0	0	659	7	139.28	0	0	Replicate1 + Replicate2
Chr1	16326401	16326600	1324.96	7.16	236.43	0	0	936	14	224.78	0	0	Replicate2
Chr1	16341101	16341200	47.27	8.59	125.65	0	0	48	5	110.32	1.36	1.4	Replicate1
Chr1	16342801	16342900	644.58	15.76	248	0	0	802	12	245.46	0	1.4	Replicate1 + Replicate2
Chr1	16355701	16355800	242.07	4.3	173.6	0	0	225	5	113.08	0	0	Replicate2
Chr1	16360201	16360300	668.93	15.76	1605.38	1.56	3.01	846	19	1525.16	1.36	0	Replicate1 + Replicate2
Chr1	16360501	16360600	124.62	7.16	94.24	0	0	233	6	104.8	1.36	0	Replicate1 + Replicate2
Chr1	16360801	16361000	736.25	8.59	246.35	0	0	578	12	226.16	0	0	Replicate1 + Replicate2
Chr1	16378801	16378900	297.94	2.86	114.08	0	0	296	8	106.18	0	0	Replicate2
Chr1	16380201	16380300	423.99	7.16	317.44	1.56	0	384	3	277.18	6.78	0	Replicate1
Chr1	16381001	16381100	98.83	8.59	102.51	1.56	0	93	3	59.3	0	0	Replicate1
Chr1	16386801	16386900	1602.84	8.59	317.44	1.56	0	1430	15	262.01	1.36	1.4	Replicate1 + Replicate2
Chr1	16387401	16387500	151.83	7.16	150.45	1.56	0	156	4	114.46	0	0	Replicate1
Chr1	16400901	16401000	2161.48	42.97	1180.48	0	0	2618	48	1099.05	4.07	0	Replicate1 + Replicate2
Chr1	16403701	16403800	160.43	2.86	23.15	0	0	148	6	20.68	0	0	Replicate2
Chr1	16418801	16419000	391.04	1.43	100.85	0	0	387	15	74.47	0	0	Replicate2
Chr1	16460001	16460100	130.35	5.73	130.61	0	0	121	3	103.42	0	0	Replicate1
Chr1	16474801	16475000	369.56	5.72	115.74	0	0	412	12	89.63	0	0	Replicate2
Chr1	16476701	16476800	383.88	4.3	54.56	0	0	502	6	79.98	0	0	Replicate2
Chr1	16514301	16514400	651.74	5.73	181.87	0	0	579	5	170.99	0	2.8	Replicate1
Chr1	16590801	16590900	247.8	4.3	84.32	0	0	173	6	95.15	0	0	Replicate2
Chr1	16591401	16591500	47.27	5.73	24.8	0	0	52	0	19.31	0	0	Replicate1
Chr1	16592501	16592700	389.61	2.86	85.97	0	0	601	11	111.7	0	0	Replicate2
Chr1	16593001	16593100	3419.11	24.35	413.33	0	3.01	3220	11	368.19	0	2.8	Replicate1 + Replicate2
Chr1	16613301	16613400	320.86	1.43	127.31	0	0	336	6	92.39	0	0	Replicate2
Chr1	16624501	16624700	2184.39	12.89	289.33	0	1.51	2520	25	282.69	4.07	0	Replicate1 + Replicate2
Chr1	16625601	16625800	2245.99	18.62	310.83	0	1.51	2546	26	292.34	4.07	0	Replicate1 + Replicate2
Chr1	16626701	16626800	25.78	5.73	46.29	0	0	19	0	27.58	0	0	Replicate1
Chr1	16637301	16637400	211.99	5.73	56.21	0	0	276	7	46.89	2.71	0	Replicate1 + Replicate2
Chr1	16641101	16641200	362.39	7.16	62.83	0	0	387	0	33.1	0	0	Replicate1
Chr1	16645901	16646000	1196.04	7.16	64.48	0	0	1179	13	44.13	0	0	Replicate1 + Replicate2
Chr1	16659701	16659800	280.75	4.3	115.73	0	0	265	5	88.25	0	0	Replicate2
Chr1	16673601	16673700	94.54	10.03	439.79	0	1.51	62	10	433	0	0	Replicate1 + Replicate2
Chr1	16699201	16699500	1170.26	37.24	163.68	0	0	1303	25	137.9	1.36	0	Replicate1 + Replicate2
Chr1	16711301	16711400	401.07	7.16	14.88	0	0	421	6	15.17	0	0	Replicate1 + Replicate2
Chr1	16737801	16737900	5964.47	51.57	1081.28	0	1.51	6995	62	1021.83	1.36	0	Replicate1 + Replicate2
Chr1	16738401	16738500	1846.35	7.16	325.71	1.56	0	2116	7	257.87	0	0	Replicate1 + Replicate2
Chr1	16742001	16742100	54.43	4.3	18.19	0	1.51	43	7	19.31	0	0	Replicate2
Chr1	16742201	16742300	94.54	7.16	77.71	0	0	92	2	70.33	0	0	Replicate1
Chr1	16791401	16791700	3068.18	42.97	555.52	0	3.02	3556	32	488.16	0	0	Replicate1 + Replicate2
Chr1	16815401	16815500	197.67	8.59	69.44	0	0	192	8	55.16	0	1.4	Replicate1 + Replicate2
Chr1	16822301	16822400	448.34	2.86	57.87	0	0	424	5	55.16	0	0	Replicate2
Chr1	16825201	16825300	1224.69	25.78	347.2	1.56	0	927	20	297.86	0	0	Replicate1 + Replicate2
Chr1	16841001	16841100	352.37	7.16	54.56	0	0	424	2	55.16	0	0	Replicate1
Chr1	16859101	16859200	136.08	1.43	56.21	0	0	159	5	51.02	0	0	Replicate2
Chr1	16868401	16868500	12.89	2.86	722.5	0	1.51	9	9	681.22	1.36	0	Replicate2
Chr1	16870201	16870300	113.16	2.86	16.53	0	0	109	5	15.17	0	0	Replicate2
Chr1	16899501	16899600	276.45	1.43	41.33	0	0	223	7	62.05	0	0	Replicate2
Chr1	16902901	16903000	1029.89	1.43	23.15	0	0	780	6	17.93	0	0	Replicate2
Chr1	16904101	16904200	45.84	5.73	16.53	1.56	0	58	2	15.17	0	0	Replicate1
Chr1	16904401	16904500	80.21	5.73	74.4	0	0	140	2	64.81	0	0	Replicate1
Chr1	16904701	16904800	674.66	11.46	423.25	0	1.51	873	18	373.7	0	0	Replicate1 + Replicate2
Chr1	16905001	16905100	11519.3	25.78	1344.16	4.67	0	10951	31	1207.99	1.36	1.4	Replicate1 + Replicate2
Chr1	16936801	16936900	207.7	17.19	31.41	0	0	268	10	31.72	0	0	Replicate1 + Replicate2
Chr1	16966101	16966200	237.78	4.3	84.32	0	0	170	6	93.77	0	0	Replicate2
Chr1	16967601	16967800	1720.3	14.32	213.28	3.12	1.51	1811	26	210.98	1.36	5.6	Replicate1 + Replicate2
Chr1	16968101	16968200	1310.64	8.59	102.51	0	0	1541	5	85.5	0	0	Replicate1 + Replicate2
Chr1	16987801	16987900	2697.19	17.19	370.35	0	1.51	2341	12	373.7	0	4.2	Replicate1 + Replicate2
Chr1	16997901	16998100	13461.6	31.51	1658.29	6.23	0	11716	39	1563.77	1.36	1.4	Replicate1 + Replicate2
Chr1	16998601	16998700	322.29	5.73	100.85	0	0	270	5	95.15	0	0	Replicate1 + Replicate2
Chr1	17017701	17017800	40.11	0	11.57	0	0	73	5	19.31	0	0	Replicate2
Chr1	17035101	17035400	830.78	15.76	388.54	3.12	0	883	14	296.48	1.36	0	Replicate1 + Replicate2
Chr1	17071501	17071600	405.37	8.59	112.43	0	0	536	8	115.83	0	0	Replicate1 + Replicate2
Chr1	17076901	17077000	348.07	5.73	127.31	0	0	440	9	99.29	0	0	Replicate1 + Replicate2
Chr1	17083001	17083100	1128.72	14.32	145.49	0	0	1220	12	96.53	0	0	Replicate1 + Replicate2
Chr1	17102201	17102400	306.53	15.76	348.85	1.56	0	434	22	406.8	0	0	Replicate1 + Replicate2
Chr1	17107501	17107600	204.83	18.62	378.61	0	0	279	14	299.24	0	0	Replicate1 + Replicate2
Chr1	17116401	17116500	323.72	4.3	24.8	0	0	400	5	20.68	0	0	Replicate2
Chr1	17136201	17136300	305.1	5.73	16.53	0	0	276	5	6.89	0	0	Replicate1 + Replicate2
Chr1	17137801	17137900	70.19	8.59	31.41	0	0	64	2	23.44	0	0	Replicate1
Chr1	17139601	17139700	90.24	5.73	21.49	0	0	84	2	23.44	0	0	Replicate1
Chr1	17141301	17141400	87.38	8.59	31.41	0	0	91	2	26.2	0	0	Replicate1
Chr1	17151801	17152000	575.82	12.89	211.62	1.56	1.51	665	7	212.36	0	0	Replicate1
Chr1	17178701	17178800	658.9	2.86	23.15	0	0	523	6	30.34	0	0	Replicate2
Chr1	17201701	17201800	328.02	4.3	71.09	0	0	402	5	78.6	0	0	Replicate2
Chr1	17201801	17201900	97.4	5.73	11.57	0	0	126	7	4.14	0	0	Replicate1
Chr1	17229101	17229300	694.71	12.89	97.55	0	0	789	7	126.87	0	0	Replicate1 + Replicate2
Chr1	17239801	17239900	127.48	1.43	16.53	0	0	222	6	9.65	0	0	Replicate2
Chr1	17268001	17268100	898.11	7.16	195.09	0	0	989	7	180.65	0	0	Replicate1 + Replicate2
Chr1	17279601	17279700	5.73	5.73	297.6	1.56	0	10	4	296.48	0	1.4	Replicate1
Chr1	17282401	17282500	300.8	34.38	74.4	0	0	411	24	31.72	1.36	0	Replicate1 + Replicate2
Chr1	17289201	17289300	216.29	7.16	51.25	0	0	212	0	48.26	0	0	Replicate1
Chr1	17293301	17293400	184.78	14.32	16.53	0	0	198	11	19.31	0	0	Replicate1 + Replicate2
Chr1	17299901	17300100	459.8	11.46	87.62	0	0	418	9	60.67	0	0	Replicate1 + Replicate2
Chr1	17305701	17305800	405.37	10.03	26.45	0	0	412	3	11.03	0	0	Replicate1
Chr1	17312401	17312500	416.83	1.43	21.49	0	0	430	5	13.79	0	0	Replicate2
Chr1	17324701	17324900	571.52	12.89	105.81	0	0	700	13	73.08	0	0	Replicate1 + Replicate2
Chr1	17335501	17335600	784.95	30.08	16.53	0	0	964	12	26.2	0	0	Replicate2
Chr1	17335601	17335700	312.26	7.16	13.23	0	0	241	3	6.89	0	1.4	Replicate1
Chr1	17369001	17369200	419.69	12.89	147.15	0	0	514	16	150.31	0	0	Replicate1 + Replicate2
Chr1	17381401	17381500	78.78	2.86	24.8	0	0	85	5	9.65	0	0	Replicate2
Chr1	17382001	17382100	336.61	20.05	150.45	0	0	375	22	146.17	2.71	0	Replicate1 + Replicate2
Chr1	17384401	17384500	1697.38	5.73	105.81	0	0	1862	9	118.59	0	0	Replicate1 + Replicate2
Chr1	17405301	17405400	41.54	5.73	9.92	0	0	50	0	12.41	0	0	Replicate1
Chr1	17405601	17405700	836.52	4.3	355.47	1.56	0	1119	9	347.5	1.36	0	Replicate2
Chr1	17405801	17405900	38.67	5.73	8.27	0	0	45	0	12.41	0	0	Replicate1
Chr1	17406101	17406200	840.81	4.3	221.55	4.67	0	1095	6	233.05	1.36	0	Replicate2
Chr1	17431001	17431200	1203.21	37.24	186.83	0	0	1082	17	175.13	0	0	Replicate1 + Replicate2
Chr1	17441601	17441800	1459.61	7.16	168.64	0	1.51	1594	23	151.69	2.71	1.4	Replicate1 + Replicate2
Chr1	17448601	17448700	189.08	0	218.24	0	0	219	5	187.54	0	0	Replicate2
Chr1	17491001	17491100	497.04	10.03	343.89	0	1.51	519	3	274.42	0	0	Replicate1
Chr1	17502201	17502300	479.85	7.16	165.33	0	0	708	4	166.86	0	0	Replicate1
Chr1	17502601	17502700	2685.73	58.73	972.16	0	0	2299	30	714.31	5.43	2.8	Replicate1 + Replicate2
Chr1	17511201	17511300	203.4	5.73	67.79	0	1.51	284	9	77.22	0	0	Replicate1 + Replicate2
Chr1	17528701	17529200	2191.55	44.41	1187.09	0	1.51	2575	35	1245.23	5.43	0	Replicate1 + Replicate2
Chr1	17535701	17536100	1715.99	32.95	944.05	0	1.51	1891	23	1024.58	4.07	0	Replicate1 + Replicate2
Chr1	17551501	17551600	2198.72	20.05	109.12	0	4.52	2037	10	121.35	0	0	Replicate1 + Replicate2
Chr1	17560801	17560900	1269.1	7.16	24.8	0	0	1189	5	8.27	0	0	Replicate1 + Replicate2
Chr1	17611701	17611800	147.54	8.59	89.28	0	0	191	11	49.64	0	0	Replicate1 + Replicate2
Chr1	17632401	17632600	227.75	2.86	155.41	0	0	265	10	158.59	0	0	Replicate2
Chr1	17638801	17639000	4027.88	32.95	1020.1	1.56	1.51	4226	30	933.57	1.36	2.8	Replicate1 + Replicate2
Chr1	17660001	17660200	1899.35	22.92	355.47	0	0	1694	20	354.4	0	1.4	Replicate1 + Replicate2
Chr1	17665101	17665200	1565.6	11.46	257.92	0	1.51	1700	21	228.91	4.07	0	Replicate1 + Replicate2
Chr1	17666001	17666300	1312.07	14.32	314.13	0	0	1510	9	268.9	1.36	0	Replicate1 + Replicate2
Chr1	17685701	17685800	170.45	1.43	99.2	0	0	228	5	66.19	0	0	Replicate2
Chr1	17689701	17690000	666.06	24.35	1261.49	0	0	633	13	1137.66	0	2.8	Replicate1 + Replicate2
Chr1	17690401	17690500	137.51	7.16	85.97	0	0	139	4	59.3	2.71	1.4	Replicate1
Chr1	17709501	17709600	6351.21	97.4	1783.94	1.56	1.51	7382	89	1853.35	4.07	1.4	Replicate1 + Replicate2
Chr1	17710701	17710800	326.58	1.43	133.92	0	0	330	5	86.88	0	0	Replicate2
Chr1	17713601	17713700	895.24	5.73	160.37	4.67	1.51	851	9	139.28	0	4.2	Replicate2
Chr1	17713701	17713800	247.8	8.59	104.16	0	0	285	3	75.84	0	0	Replicate1
Chr1	17714001	17714100	580.12	5.73	109.12	0	0	507	8	85.5	0	1.4	Replicate1 + Replicate2
Chr1	17714401	17714600	2694.32	32.94	2268.37	6.22	6.03	2296	16	1783.02	8.14	5.6	Replicate1
Chr1	17812301	17812400	919.59	20.05	877.92	0	0	1305	29	740.51	2.71	1.4	Replicate1 + Replicate2
Chr1	17813701	17813900	955.4	21.49	884.54	0	0	1351	32	744.65	2.72	1.4	Replicate1 + Replicate2
Chr1	17831301	17831400	204.83	5.73	6.61	0	0	210	6	1.38	0	0	Replicate1
Chr1	17842401	17842500	287.91	7.16	95.89	0	0	365	2	74.47	1.36	0	Replicate1
Chr1	17863101	17863200	981.19	42.97	190.13	0	0	808	33	103.42	0	1.4	Replicate1 + Replicate2
Chr1	17900801	17900900	381.02	7.16	150.45	0	1.51	502	13	137.9	0	0	Replicate1 + Replicate2
Chr1	17901101	17901200	1032.75	1.43	90.93	0	0	762	5	89.63	0	0	Replicate2
Chr1	17937101	17937200	237.78	5.73	262.88	1.56	0	241	0	227.53	1.36	0	Replicate1
Chr1	17937601	17938000	1852.08	25.77	831.63	1.56	0	2230	26	861.87	1.36	0	Replicate1 + Replicate2
Chr1	17939001	17939100	603.04	5.73	3.31	0	0	662	5	5.52	0	0	Replicate2
Chr1	17961501	17961600	88.81	10.03	8.27	0	0	117	18	22.06	0	0	Replicate2
Chr1	17965701	17965800	11.46	2.86	376.96	0	1.51	9	6	366.81	0	0	Replicate2
Chr1	18002301	18002600	1809.11	14.32	219.89	1.56	0	1290	14	235.81	0	0	Replicate1 + Replicate2
Chr1	18007001	18007300	1789.06	14.32	216.58	1.56	0	1273	14	228.91	0	0	Replicate1 + Replicate2
Chr1	18013301	18013600	1680.19	38.67	429.87	0	0	2035	31	383.36	0	1.4	Replicate1 + Replicate2
Chr1	18015801	18015900	147.54	2.86	54.56	0	0	170	5	52.4	0	0	Replicate2
Chr1	18017701	18018100	2827.54	47.27	659.68	0	0	3299	41	672.94	1.36	1.4	Replicate1 + Replicate2
Chr1	18048101	18048200	220.59	2.86	254.61	0	0	212	8	227.53	0	0	Replicate2
Chr1	18055901	18056000	315.13	10.03	34.72	0	0	364	8	30.34	0	0	Replicate1 + Replicate2
Chr1	18088201	18088300	207.7	1.43	0	0	0	209	5	5.52	0	0	Replicate2
Chr1	18088801	18088900	3665.48	11.46	1218.5	0	3.01	4270	13	951.5	1.36	2.8	Replicate1 + Replicate2
Chr1	18095801	18095900	213.43	5.73	8.27	0	0	210	18	12.41	0	0	Replicate1
Chr1	18110801	18110900	620.22	5.73	641.49	0	0	517	10	548.84	1.36	0	Replicate1 + Replicate2
Chr1	18111101	18111300	1562.73	25.78	79.36	0	0	1794	18	60.67	0	0	Replicate1 + Replicate2
Chr1	18126701	18126800	423.99	12.89	219.89	0	0	395	7	186.16	0	0	Replicate1 + Replicate2
Chr1	18211501	18211600	166.16	4.3	14.88	0	0	162	5	9.65	0	1.4	Replicate2
Chr1	18214401	18214500	164.72	8.59	18.19	0	0	167	6	13.79	0	0	Replicate1 + Replicate2
Chr1	18269701	18269800	61.59	5.73	8.27	0	0	62	1	1.38	0	0	Replicate1
Chr1	18272001	18272100	269.29	2.86	85.97	0	0	246	10	107.56	0	0	Replicate2
Chr1	18287301	18287400	270.72	10.03	152.11	0	0	272	6	155.83	0	2.8	Replicate1 + Replicate2
Chr1	18297501	18297600	1428.09	42.97	236.43	0	0	1608	49	202.71	0	0	Replicate1 + Replicate2
Chr1	18300301	18300400	2402.12	54.43	793.6	0	1.51	1818	28	517.12	2.71	0	Replicate1 + Replicate2
Chr1	18301001	18301100	230.61	7.16	31.41	0	0	283	4	51.02	0	0	Replicate1
Chr1	18320701	18320800	1250.48	5.73	54.56	0	0	1418	6	51.02	0	0	Replicate1 + Replicate2
Chr1	18321101	18321200	305.1	1.43	21.49	4.67	0	232	8	24.82	0	0	Replicate2
Chr1	18386401	18386600	2125.66	50.13	849.81	0	0	2250	34	650.88	0	0	Replicate1 + Replicate2
Chr1	18386701	18386800	885.22	2.86	110.77	0	0	912	5	113.08	0	0	Replicate2
Chr1	18387401	18387500	1133.02	32.94	279.41	0	0	1385	18	224.77	0	0	Replicate1 + Replicate2
Chr1	18456801	18456900	767.76	5.73	84.32	0	0	793	5	74.47	1.36	0	Replicate1 + Replicate2
Chr1	18457101	18457200	230.61	8.59	137.23	0	0	187	2	119.97	1.36	0	Replicate1
Chr1	18457601	18457700	54.43	1.43	11.57	0	0	56	5	24.82	0	0	Replicate2
Chr1	18548101	18548200	3391.9	12.89	1937.7	4.67	6.03	4150	18	1516.88	4.07	4.2	Replicate2
Chr1	18553301	18553400	253.53	4.3	74.4	0	0	341	7	84.12	0	0	Replicate2
Chr1	18599901	18600200	613.06	11.45	534.02	0	0	560	18	387.49	0	0	Replicate1 + Replicate2
Chr1	18627101	18627200	110.29	8.59	87.63	0	0	99	4	103.42	0	0	Replicate1
Chr1	18632701	18632800	1435.25	4.3	140.53	0	0	1595	7	136.52	0	0	Replicate2
Chr1	18632901	18633000	163.29	8.59	33.07	0	0	217	1	28.96	0	0	Replicate1
Chr1	18745201	18745300	372.42	17.19	100.85	0	3.01	457	10	114.46	0	0	Replicate1 + Replicate2
Chr1	18745801	18745900	439.74	8.59	79.36	0	0	448	5	99.29	0	0	Replicate1 + Replicate2
Chr1	18746101	18746200	408.23	24.35	239.73	0	0	411	15	193.06	0	0	Replicate1 + Replicate2
Chr1	18766501	18766600	476.99	7.16	186.83	0	0	549	9	199.95	0	0	Replicate1 + Replicate2
Chr1	18769701	18769800	509.93	5.73	77.71	0	0	562	1	53.78	1.36	0	Replicate1
Chr1	18791401	18791500	968.3	11.46	186.83	0	0	660	5	132.38	0	0	Replicate1 + Replicate2
Chr1	18791701	18791800	88.81	4.3	99.2	0	0	93	9	99.29	0	0	Replicate2
Chr1	18806901	18807000	209.13	10.03	127.31	0	0	228	13	128.25	0	0	Replicate1 + Replicate2
Chr1	18817501	18817600	297.94	10.03	94.24	0	0	388	17	95.15	0	0	Replicate1 + Replicate2
Chr1	18854601	18854700	4.3	5.73	8.27	0	0	11	0	16.55	0	0	Replicate1
Chr1	18859301	18859400	1045.64	12.89	89.28	0	0	1125	25	126.87	0	0	Replicate1 + Replicate2
Chr1	18894901	18895000	684.68	5.73	137.23	0	0	666	7	143.41	1.36	0	Replicate1 + Replicate2
Chr1	18895201	18895400	1953.78	30.08	2346.07	7.78	1.51	1355	22	1698.91	6.78	4.2	Replicate1 + Replicate2
Chr1	18931001	18931100	507.07	10.03	18.19	0	0	547	12	13.79	0	0	Replicate1 + Replicate2
Chr1	18962301	18962400	131.78	0	132.27	0	0	180	5	100.67	1.36	0	Replicate2
Chr1	18971301	18971400	127.48	1.43	115.73	0	0	160	5	85.5	1.36	0	Replicate2
Chr1	19026801	19027000	3588.14	48.7	965.55	0	0	3761	46	879.79	1.36	0	Replicate1 + Replicate2
Chr1	19027801	19027900	307.96	1.43	117.39	0	0	310	5	74.47	0	0	Replicate2
Chr1	19055201	19055300	131.78	1.43	23.15	0	0	192	5	20.68	0	0	Replicate2
Chr1	19063301	19063400	124.62	7.16	69.44	0	0	115	1	66.19	0	0	Replicate1
Chr1	19085701	19085800	226.32	7.16	112.43	0	0	187	4	70.33	1.36	0	Replicate1
Chr1	19086301	19086400	106	10.03	33.07	0	0	118	1	37.23	0	0	Replicate1
Chr1	19145601	19145700	716.19	5.73	42.99	0	0	545	3	45.51	0	0	Replicate1
Chr1	19172401	19172500	310.83	2.86	11.57	0	3.01	323	5	23.44	0	0	Replicate2
Chr1	19172501	19172600	104.56	8.59	29.76	0	0	131	1	31.72	0	0	Replicate1
Chr1	19172801	19172900	61.59	7.16	29.76	0	0	56	4	16.55	0	0	Replicate1
Chr1	19173101	19173200	247.8	7.16	119.04	0	0	194	4	84.12	0	0	Replicate1
Chr1	19180301	19180400	320.86	2.86	18.19	0	0	440	6	16.55	0	0	Replicate2
Chr1	19197901	19198000	558.63	2.86	52.91	0	0	418	12	49.64	0	0	Replicate2
Chr1	19198101	19198200	565.79	11.46	18.19	1.56	0	701	3	34.47	0	0	Replicate1
Chr1	19226301	19226400	101.7	4.3	8.27	0	0	82	6	6.89	0	0	Replicate2
Chr1	19233901	19234000	104.56	5.73	23.15	0	0	112	0	12.41	0	0	Replicate1
Chr1	19248101	19248200	297.94	1.43	119.04	0	0	288	5	77.22	0	0	Replicate2
Chr1	19249001	19249100	1764.7	14.32	345.55	0	0	2006	4	273.04	0	0	Replicate1
Chr1	19268701	19268800	1693.08	2.86	41.33	1.56	0	1560	7	24.82	0	0	Replicate2
Chr1	19268801	19268900	15.76	5.73	9.92	0	0	24	0	11.03	0	0	Replicate1
Chr1	19303901	19304000	116.02	0	16.53	0	0	138	6	16.55	0	0	Replicate2
Chr1	19304001	19304100	209.13	5.73	39.68	0	0	177	4	34.47	0	0	Replicate1
Chr1	19328501	19328600	438.31	17.19	228.16	0	0	433	6	175.13	0	0	Replicate1 + Replicate2
Chr1	19336301	19336600	2341.95	58.73	1762.45	0	3.02	2336	59	1439.65	18.99	1.4	Replicate1 + Replicate2
Chr1	19339601	19339700	146.1	5.73	109.12	0	0	183	1	136.52	0	0	Replicate1
Chr1	19342301	19342400	100.27	0	89.28	0	0	58	5	102.04	0	0	Replicate2
Chr1	19345501	19345600	232.05	7.16	82.67	1.56	0	241	6	86.88	0	2.8	Replicate1 + Replicate2
Chr1	19352801	19352900	1337.85	4.3	119.04	0	0	1146	13	117.21	2.71	0	Replicate2
Chr1	19353301	19353400	128.92	4.3	64.48	0	0	106	7	52.4	0	0	Replicate2
Chr1	19368501	19368600	180.48	7.16	21.49	0	0	154	3	15.17	0	0	Replicate1
Chr1	19380201	19380300	206.26	7.16	135.57	0	0	196	1	121.35	0	0	Replicate1
Chr1	19389701	19389800	1184.59	73.05	305.87	0	0	1220	40	290.97	0	0	Replicate1 + Replicate2
Chr1	19392201	19392300	167.59	24.35	66.13	0	0	153	22	53.78	0	0	Replicate1 + Replicate2
Chr1	19403401	19403500	342.34	7.16	163.68	0	1.51	535	9	199.95	0	0	Replicate1 + Replicate2
Chr1	19424901	19425000	693.28	5.73	39.68	0	0	663	3	35.85	0	0	Replicate1
Chr1	19430401	19430600	1741.79	30.08	105.81	0	0	1221	27	63.43	1.36	0	Replicate1 + Replicate2
Chr1	19465801	19465900	764.9	4.3	104.16	0	0	672	13	119.97	0	0	Replicate2
Chr1	19466101	19466300	1416.63	25.78	403.41	1.56	0	1068	20	366.81	0	0	Replicate1 + Replicate2
Chr1	19577101	19577200	90.24	1.43	143.84	0	0	106	5	154.45	0	0	Replicate2
Chr1	19577601	19577700	260.69	8.59	9.92	0	0	279	4	17.93	0	0	Replicate1
Chr1	19577701	19577800	95.97	1.43	16.53	0	1.51	108	6	17.93	1.36	0	Replicate2
Chr1	19578001	19578100	267.86	8.59	11.57	0	0	306	4	17.93	0	0	Replicate1
Chr1	19578101	19578200	95.97	1.43	16.53	0	1.51	101	6	17.93	1.36	0	Replicate2
Chr1	19593701	19593800	388.18	7.16	94.24	0	0	425	5	74.47	0	0	Replicate1 + Replicate2
Chr1	19665901	19666000	451.2	17.19	472.85	0	1.51	438	12	472.99	1.36	1.4	Replicate1 + Replicate2
Chr1	19717901	19718000	167.59	1.43	39.68	0	0	211	6	28.96	0	0	Replicate2
Chr1	19728701	19728800	436.88	7.16	158.72	3.11	3.01	506	6	143.41	1.36	0	Replicate2
Chr1	19728801	19729500	6653.45	61.59	2648.64	4.68	0	5959	53	2247.74	1.36	1.4	Replicate1 + Replicate2
Chr1	19734701	19734800	123.19	11.46	181.87	0	0	164	3	278.55	0	0	Replicate1
Chr1	19768701	19768800	375.29	2.86	201.71	0	0	396	6	190.3	1.36	0	Replicate2
Chr1	19780301	19780400	78.78	5.73	23.15	0	0	83	1	17.93	0	0	Replicate1
Chr1	19780401	19780700	1350.75	7.16	117.38	0	0	1298	12	111.7	0	0	Replicate2
Chr1	19780901	19781000	810.73	2.86	52.91	0	0	657	5	59.3	0	0	Replicate2
Chr1	19809801	19809900	179.05	1.43	59.52	0	0	138	6	31.72	0	0	Replicate2
Chr1	19909101	19909200	340.91	5.73	66.13	0	0	321	0	62.05	0	0	Replicate1
Chr1	19909201	19909300	164.72	2.86	64.48	0	0	212	10	67.57	0	0	Replicate2
Chr1	19944301	19944400	558.63	11.46	457.97	0	3.01	727	11	354.4	1.36	0	Replicate1 + Replicate2
Chr1	19994201	19994300	368.12	2.86	176.91	0	0	382	5	117.21	0	1.4	Replicate2
Chr1	19994701	19994800	461.23	7.16	203.36	0	1.51	545	5	228.91	0	0	Replicate1 + Replicate2
Chr1	20112701	20112800	307.96	4.3	16.53	0	0	292	9	13.79	0	2.8	Replicate2
Chr1	20114101	20114200	532.85	5.73	77.71	0	0	538	2	84.12	0	0	Replicate1
Chr1	20115401	20115700	2160.05	30.08	466.25	4.67	0	2022	23	450.92	0	7	Replicate1 + Replicate2
Chr1	20125201	20125300	236.34	4.3	14.88	0	0	219	9	13.79	0	1.4	Replicate2
Chr1	20126701	20126800	558.63	7.16	72.75	0	0	576	4	78.6	0	0	Replicate1
Chr1	20127901	20128200	2162.91	30.07	462.93	4.67	0	2033	22	452.31	0	7	Replicate1 + Replicate2
Chr1	20172101	20172200	176.18	5.73	168.64	0	1.51	182	6	113.08	0	1.4	Replicate1 + Replicate2
Chr1	20205801	20205900	213.43	7.16	155.41	0	0	296	6	146.17	0	0	Replicate1 + Replicate2
Chr1	20206701	20206900	1485.39	15.76	355.46	0	0	1438	18	394.38	5.43	0	Replicate1 + Replicate2
Chr1	20226601	20226700	796.41	7.16	61.17	0	0	777	4	56.54	0	2.8	Replicate1
Chr1	20312401	20312500	111.73	10.03	216.59	0	0	149	1	199.95	0	0	Replicate1
Chr1	20313701	20313800	48.7	0	29.76	0	0	55	5	63.43	0	0	Replicate2
Chr1	20314401	20314500	257.83	2.86	284.37	3.11	0	253	7	310.27	1.36	0	Replicate2
Chr1	20319801	20320400	2001.03	32.93	768.8	0	0	1909	5	741.89	0	4.2	Replicate1
Chr1	20362901	20363000	1885.02	12.89	300.91	0	1.51	1611	4	230.29	1.36	0	Replicate1
Chr1	20367401	20367500	1105.8	11.46	76.05	0	0	1307	13	110.32	0	0	Replicate1 + Replicate2
Chr1	20403501	20403600	971.16	5.73	13.23	0	0	991	7	12.41	0	0	Replicate1 + Replicate2
Chr1	20433001	20433100	348.07	10.03	11.57	0	0	446	4	9.65	0	0	Replicate1
Chr1	20477001	20477100	244.94	5.73	137.23	0	0	274	0	154.45	0	0	Replicate1
Chr1	20509301	20509400	230.61	8.59	105.81	0	0	201	1	86.88	0	0	Replicate1
Chr1	20559701	20559800	843.68	20.05	446.4	0	1.51	898	11	366.81	0	1.4	Replicate1 + Replicate2
Chr1	20569101	20569200	25.78	2.86	51.25	0	0	35	6	49.64	0	0	Replicate2
Chr1	20622501	20622600	365.26	5.73	94.24	0	0	407	4	79.98	0	0	Replicate1
Chr1	20622601	20622700	601.6	1.43	97.55	0	0	614	6	53.78	2.71	0	Replicate2
Chr1	20683501	20683600	1380.82	14.32	662.98	0	0	1469	10	595.72	2.71	1.4	Replicate1 + Replicate2
Chr1	20685501	20685600	1833.46	14.32	1163.94	0	1.51	1748	12	985.97	1.36	0	Replicate1 + Replicate2
Chr1	20699801	20700000	2949.29	28.65	577.02	0	0	3140	24	495.06	0	0	Replicate1 + Replicate2
Chr1	20703901	20704000	104.56	5.73	16.53	0	0	132	4	8.27	0	0	Replicate1
Chr1	20826901	20827300	1191.75	40.1	295.94	3.12	0	1325	31	235.81	0	0	Replicate1 + Replicate2
Chr1	20972101	20972200	1309.2	8.59	66.13	0	0	1566	4	51.02	0	0	Replicate1
Chr1	20972501	20972700	1875	20.05	332.32	1.56	3.01	1916	34	308.89	2.71	7	Replicate1 + Replicate2
Chr1	20979401	20979700	3775.78	38.67	922.55	0	0	3255	30	809.47	2.71	1.4	Replicate1 + Replicate2
Chr1	20980001	20980400	1419.5	38.67	3478.61	1.56	7.54	1512	40	3206.13	4.08	5.6	Replicate1 + Replicate2
Chr1	20980501	20980600	58.73	7.16	133.92	0	0	62	3	140.66	0	0	Replicate1
Chr1	21081901	21082000	375.29	5.73	24.8	0	0	506	1	26.2	0	0	Replicate1
Chr1	21120401	21120500	1094.35	24.35	105.81	0	0	1433	23	84.12	0	0	Replicate1 + Replicate2
Chr1	21125801	21126100	540.01	22.91	333.97	0	0	696	30	262.01	0	16.8	Replicate1 + Replicate2
Chr1	21128701	21128800	306.53	4.3	271.15	0	0	262	5	246.84	0	0	Replicate2
Chr1	21144701	21144800	275.02	5.73	24.8	0	0	235	2	22.06	0	0	Replicate1
Chr1	21210201	21210300	150.4	0	29.76	0	0	179	9	38.61	1.36	0	Replicate2
Chr1	21211101	21211300	8832.12	131.78	2612.26	4.67	1.51	10275	122	2620.07	5.43	1.4	Replicate1 + Replicate2
Chr1	21228801	21229000	615.93	8.59	117.38	0	0	686	11	142.03	0	0	Replicate1 + Replicate2
Chr1	21244401	21244500	230.61	7.16	39.68	0	0	240	3	17.93	0	0	Replicate1
Chr1	21260101	21260300	4311.49	295.07	6996.89	4.67	7.53	6199	288	6715.65	13.57	5.6	Replicate1 + Replicate2
Chr1	21311801	21311900	792.11	11.46	24.8	0	0	742	8	12.41	0	0	Replicate1 + Replicate2
Chr1	21335901	21336000	94.54	5.73	77.71	0	0	137	5	99.29	0	1.4	Replicate1 + Replicate2
Chr1	21336301	21336400	2107.04	54.43	1025.06	0	1.51	2047	20	666.05	1.36	1.4	Replicate1 + Replicate2
Chr1	21341501	21341600	191.94	11.46	49.6	0	1.51	235	4	57.92	0	0	Replicate1
Chr1	21342401	21342500	209.13	8.59	69.44	3.11	1.51	280	5	71.71	0	0	Replicate2
Chr1	21390101	21390200	54.43	5.73	23.15	1.56	0	42	3	19.31	0	0	Replicate1
Chr1	21392701	21392800	631.68	7.16	99.2	0	0	665	6	79.98	0	0	Replicate1 + Replicate2
Chr1	21399901	21400000	120.32	7.16	31.41	0	0	98	2	24.82	0	0	Replicate1
Chr1	21401601	21401700	55.86	5.73	24.8	0	0	44	2	23.44	0	0	Replicate1
Chr1	21418601	21418700	360.96	10.03	77.71	0	0	496	9	60.68	0	0	Replicate1 + Replicate2
Chr1	21428301	21428400	196.24	4.3	57.87	0	0	190	7	59.3	1.36	0	Replicate2
Chr1	21507801	21507900	1545.55	20.05	186.83	0	0	1998	14	177.89	0	1.4	Replicate1 + Replicate2
Chr1	21525001	21525400	2413.58	45.84	519.15	0	0	2820	35	489.54	1.36	1.4	Replicate1 + Replicate2
Chr1	21527101	21527200	147.54	2.86	49.6	0	0	162	5	48.26	0	0	Replicate2
Chr1	21529301	21529700	1314.93	37.25	188.47	0	0	1366	25	176.51	0	0	Replicate1 + Replicate2
Chr1	21609401	21609500	222.02	10.03	33.07	0	0	249	5	13.79	0	0	Replicate1 + Replicate2
Chr1	21640701	21640800	1339.28	2.86	171.95	0	0	913	5	168.24	0	0	Replicate2
Chr1	21681501	21681600	6283.89	80.21	1573.97	0	1.51	7384	89	1538.95	4.07	1.4	Replicate1 + Replicate2
Chr1	21682401	21682500	376.72	2.86	135.57	0	0	390	6	102.04	0	0	Replicate2
Chr1	21710501	21710600	2168.64	5.73	92.59	0	0	2391	6	117.21	2.71	0	Replicate1 + Replicate2
Chr1	21739101	21739200	800.71	8.59	133.92	0	0	590	4	81.36	0	1.4	Replicate1
Chr1	21741701	21741800	207.7	5.73	102.51	1.56	0	253	3	73.09	1.36	0	Replicate1
Chr1	21784901	21785000	958.27	4.3	57.87	0	0	1134	6	55.16	0	0	Replicate2
Chr1	21808301	21808400	174.75	1.43	29.76	0	0	198	10	17.93	1.36	0	Replicate2
Chr1	21821101	21821200	932.49	4.3	51.25	0	0	1109	5	57.92	0	0	Replicate2
Chr1	21844601	21844700	170.45	0	29.76	0	0	190	10	16.55	0	0	Replicate2
Chr1	21853601	21853800	1685.92	37.25	487.73	1.56	3.01	1997	21	492.29	2.71	0	Replicate1 + Replicate2
Chr1	21857901	21858000	194.8	5.73	104.16	1.56	0	193	3	71.71	0	0	Replicate1
Chr1	21872201	21872300	269.29	8.59	41.33	0	0	237	5	34.47	0	0	Replicate1 + Replicate2
Chr1	21918401	21918600	2810.34	51.57	1197.01	0	0	2732	48	1099.05	2.71	0	Replicate1 + Replicate2
Chr1	21976901	21977000	273.59	5.73	72.75	0	0	286	1	68.95	0	0	Replicate1
Chr1	21992601	21992700	55.86	7.16	51.25	0	0	64	3	41.37	0	0	Replicate1
Chr1	21996101	21996200	2233.09	7.16	297.6	0	0	1841	8	249.6	1.36	0	Replicate1 + Replicate2
Chr1	22025001	22025100	544.31	14.32	31.41	0	0	620	12	17.93	0	1.4	Replicate1 + Replicate2
Chr1	22060601	22060700	189.08	8.59	54.56	0	1.51	146	6	48.26	0	1.4	Replicate1 + Replicate2
Chr1	22084901	22085000	345.21	7.16	90.93	0	0	389	4	71.71	1.36	0	Replicate1
Chr1	22085201	22085400	462.66	14.32	257.92	1.56	1.51	520	16	227.53	0	4.2	Replicate1 + Replicate2
Chr1	22089101	22089200	699.01	1.43	71.09	0	0	764	5	66.19	0	0	Replicate2
Chr1	22105301	22105400	316.56	1.43	125.65	0	0	321	5	79.98	0	0	Replicate2
Chr1	22106501	22106700	6472.97	57.29	854.77	3.11	3.02	7588	40	866.01	4.07	1.4	Replicate1 + Replicate2
Chr1	22112601	22112700	1833.46	8.59	236.43	4.67	6.03	2047	21	245.46	4.07	2.8	Replicate2
Chr1	22162501	22162600	976.89	10.03	254.61	0	1.51	1214	6	244.08	1.36	0	Replicate1 + Replicate2
Chr1	22165801	22165900	730.52	7.16	310.83	0	0	772	5	268.9	0	0	Replicate1 + Replicate2
Chr1	22192001	22192100	204.83	7.16	238.08	0	0	259	9	206.85	0	0	Replicate1 + Replicate2
Chr1	22192401	22192500	2253.15	53	1130.88	0	0	1856	28	835.66	4.07	1.4	Replicate1 + Replicate2
Chr1	22224601	22224900	1969.54	28.64	340.58	0	0	1685	11	249.6	0	0	Replicate1 + Replicate2
Chr1	22261201	22261400	853.7	20.05	249.65	1.56	0	948	9	191.68	1.36	0	Replicate1 + Replicate2
Chr1	22447501	22447600	472.69	4.3	14.88	0	0	507	5	16.55	0	0	Replicate2
Chr1	22450601	22450900	1194.61	12.89	243.04	0	0	955	13	206.85	0	0	Replicate1 + Replicate2
Chr1	22451101	22451400	12636.5	22.91	902.72	1.56	0	7082	21	864.63	0	0	Replicate1 + Replicate2
Chr1	22542101	22542300	3758.59	28.65	537.33	0	3.01	4376	29	541.94	1.36	1.4	Replicate1 + Replicate2
Chr1	22563001	22563100	123.19	0	39.68	0	0	122	6	57.92	0	0	Replicate2
Chr1	22592601	22592700	173.32	1.43	59.52	0	0	183	8	39.99	0	0	Replicate2
Chr1	22620801	22620900	401.07	4.3	188.48	0	0	406	5	113.08	0	1.4	Replicate2
Chr1	22620901	22621000	565.79	7.16	170.29	0	0	395	3	143.41	0	0	Replicate1
Chr1	22621401	22621500	12788.4	21.49	1438.4	4.67	1.51	11231	32	1354.16	0	1.4	Replicate1 + Replicate2
Chr1	22621701	22621800	348.07	5.73	124	0	0	331	10	143.41	0	0	Replicate1 + Replicate2
Chr1	22627301	22627400	58.73	7.16	16.53	0	0	55	2	13.79	0	0	Replicate1
Chr1	22693901	22694000	648.87	8.59	47.95	0	0	469	1	34.47	0	0	Replicate1
Chr1	22694201	22694300	65.89	5.73	95.89	0	1.51	52	3	57.92	0	0	Replicate1
Chr1	22694301	22694400	113.16	1.43	85.97	0	0	115	9	51.02	0	0	Replicate2
Chr1	22699301	22699400	3595.3	21.49	191.79	0	1.51	3512	18	155.83	0	0	Replicate1 + Replicate2
Chr1	22743101	22743400	2708.65	17.18	77.7	0	0	2812	21	79.99	0	1.4	Replicate1 + Replicate2
Chr1	22776001	22776100	91.67	7.16	24.8	0	0	84	3	33.1	0	0	Replicate1
Chr1	22778401	22778500	113.16	2.86	34.72	0	0	89	5	28.96	0	0	Replicate2
Chr1	22872401	22872500	571.52	11.46	175.25	6.23	6.03	634	6	188.92	1.36	0	Replicate2
Chr1	22872501	22873000	4831.44	44.39	1499.57	1.56	0	4129	34	1285.21	1.36	0	Replicate1 + Replicate2
Chr1	22887901	22888000	584.41	14.32	345.55	0	0	822	8	387.49	0	1.4	Replicate1 + Replicate2
Chr1	22890601	22890700	3303.09	12.89	46.29	0	0	3539	19	20.68	0	0	Replicate1 + Replicate2
Chr1	22992201	22992300	379.58	5.73	244.69	0	0	392	3	266.14	0	0	Replicate1
Chr1	22992401	22992500	58.73	2.86	92.59	0	0	68	9	100.67	0	0	Replicate2
Chr1	22992701	22992800	12827	24.35	1449.97	4.67	0	11281	32	1365.19	0	1.4	Replicate1 + Replicate2
Chr1	22993301	22993400	1018.43	11.46	165.33	0	0	714	8	146.17	0	1.4	Replicate1 + Replicate2
Chr1	23031701	23031800	519.96	11.46	61.17	0	0	475	8	37.23	0	0	Replicate1 + Replicate2
Chr1	23118301	23118600	1938.02	40.1	190.13	1.56	3.02	1929	23	184.78	0	1.4	Replicate1 + Replicate2
Chr1	23119901	23120000	1.43	0	8.27	0	0	5	5	8.27	0	0	Replicate2
Chr1	23122801	23123100	1786.18	32.95	166.98	0	0	1741	21	153.07	1.36	0	Replicate1 + Replicate2
Chr1	23125201	23125300	2721.54	60.16	1084.58	0	1.51	2336	37	798.43	2.71	1.4	Replicate1 + Replicate2
Chr1	23152501	23152800	878.06	45.83	834.93	0	0	1017	33	701.9	0	0	Replicate1 + Replicate2
Chr1	23174301	23174900	1718.86	38.66	727.47	1.56	0	1781	20	484.03	2.72	0	Replicate1 + Replicate2
Chr1	23174901	23175000	454.07	2.86	97.55	1.56	0	414	7	86.88	0	0	Replicate2
Chr1	23214301	23214400	1143.05	12.89	205.01	1.56	0	757	6	158.58	0	0	Replicate1 + Replicate2
Chr1	23214601	23214800	1442.42	12.89	284.37	1.56	0	1242	16	274.42	0	0	Replicate1 + Replicate2
Chr1	23240301	23240400	492.74	4.3	165.33	0	0	471	6	162.72	0	0	Replicate2
Chr1	23241901	23242000	279.32	5.73	228.16	0	0	315	8	205.47	0	0	Replicate1 + Replicate2
Chr1	23280401	23280600	2584.03	31.51	788.64	0	1.51	2550	19	667.43	2.72	0	Replicate1 + Replicate2
Chr1	23296701	23296800	176.18	7.16	205.01	0	3.01	183	4	248.22	0	2.8	Replicate1
Chr1	23424101	23424200	120.32	28.65	188.48	0	0	173	23	140.66	0	0	Replicate1 + Replicate2
Chr1	23424801	23424900	144.67	28.65	198.4	0	0	186	23	146.17	0	0	Replicate1 + Replicate2
Chr1	23430901	23431000	181.91	8.59	11.57	0	0	170	1	8.27	0	1.4	Replicate1
Chr1	23435801	23435900	196.24	5.73	19.84	0	0	148	2	23.44	2.71	0	Replicate1
Chr1	23521701	23521800	727.65	14.32	38.03	0	0	934	11	28.96	0	0	Replicate1 + Replicate2
Chr1	23542201	23542300	5.73	5.73	593.55	0	0	4	1	588.83	1.36	2.8	Replicate1
Chr1	23640101	23640200	181.91	2.86	23.15	0	0	170	5	28.96	0	0	Replicate2
Chr1	23651601	23651700	289.34	10.03	16.53	0	0	302	8	16.55	0	0	Replicate1 + Replicate2
Chr1	23723601	23723700	264.99	7.16	44.64	0	0	375	4	35.85	0	0	Replicate1
Chr1	23861901	23862000	310.83	2.86	24.8	0	0	325	5	34.47	0	0	Replicate2
Chr1	23862201	23862300	120.32	2.86	18.19	0	0	138	7	12.41	0	0	Replicate2
Chr1	23875301	23875400	678.95	8.59	18.19	1.56	0	707	7	11.03	0	0	Replicate1 + Replicate2
Chr1	23876501	23876600	252.1	2.86	94.24	0	0	260	7	91.01	0	0	Replicate2
Chr1	23876901	23877000	388.18	8.59	100.85	0	0	331	1	77.22	0	0	Replicate1
Chr1	23907101	23907200	2069.8	17.19	196.75	0	0	1647	18	197.19	1.36	0	Replicate1 + Replicate2
Chr1	23926901	23927000	133.21	11.46	234.77	0	0	198	3	341.99	0	0	Replicate1
Chr1	23930101	23930200	1039.91	4.3	84.32	0	0	611	5	70.33	0	0	Replicate2
Chr1	24126101	24126200	213.43	7.16	44.64	0	0	282	3	37.23	0	0	Replicate1
Chr1	24241301	24241500	501.34	2.86	14.88	0	0	533	15	28.95	0	0	Replicate2
Chr1	24250901	24251000	541.44	4.3	61.17	0	0	488	5	46.89	0	0	Replicate2
Chr1	24317401	24317500	704.74	17.19	117.39	0	0	685	10	95.15	0	0	Replicate1 + Replicate2
Chr1	24350701	24350800	431.15	4.3	39.68	0	0	512	9	41.37	0	0	Replicate2
Chr1	24351001	24351100	50.13	7.16	41.33	0	0	60	2	37.23	0	0	Replicate1
Chr1	24384801	24385100	179.05	10.02	84.32	0	0	242	16	93.77	0	0	Replicate1 + Replicate2
Chr1	24395701	24395900	1078.59	14.32	429.86	0	0	974	9	353.02	2.71	0	Replicate1 + Replicate2
Chr1	24429001	24429300	1630.06	11.46	315.78	1.56	0	1043	11	313.03	0	0	Replicate1 + Replicate2
Chr1	24488101	24488200	65.89	1.43	46.29	0	0	51	5	64.81	0	0	Replicate2
Chr1	24532001	24532200	1683.06	11.46	274.45	0	0	1593	24	231.67	0	0	Replicate1 + Replicate2
Chr1	24645501	24645600	796.41	7.16	90.93	0	0	850	4	59.3	0	0	Replicate1
Chr1	24705001	24705100	945.38	11.46	140.53	0	0	974	5	91.01	0	0	Replicate1 + Replicate2
Chr1	24705901	24706000	236.34	4.3	21.49	1.56	0	292	5	26.2	1.36	0	Replicate2
Chr1	24718801	24719000	978.32	22.92	327.36	0	1.51	1004	11	279.94	0	1.4	Replicate1 + Replicate2
Chr1	24745101	24745300	1221.82	17.19	41.33	0	0	1334	17	23.44	0	0	Replicate1 + Replicate2
Chr1	24772201	24772300	216.29	1.43	21.49	0	0	219	6	16.55	0	0	Replicate2
Chr1	24772901	24773000	779.22	10.03	176.91	0	4.52	562	17	176.51	0	0	Replicate1 + Replicate2
Chr1	24831701	24831900	733.38	15.76	205.01	0	0	707	12	172.37	2.71	0	Replicate1 + Replicate2
Chr1	24832501	24832600	350.94	1.43	115.73	0	0	352	6	75.84	0	0	Replicate2
Chr1	24835801	24835900	956.84	5.73	21.49	0	0	853	11	15.17	0	0	Replicate1 + Replicate2
Chr1	24838701	24838800	615.93	31.51	649.76	0	0	822	30	714.31	0	2.8	Replicate1 + Replicate2
Chr1	24871901	24872000	138.94	8.59	94.24	0	0	139	4	118.59	0	0	Replicate1
Chr1	24908401	24908600	8747.6	120.32	2241.92	4.67	1.51	10122	118	2251.88	5.43	1.4	Replicate1 + Replicate2
Chr1	24948201	24948300	3235.77	45.84	982.08	0	4.52	3796	40	908.75	0	1.4	Replicate1 + Replicate2
Chr1	25033701	25033800	426.85	8.59	115.73	0	0	413	10	100.67	0	0	Replicate1 + Replicate2
Chr1	25097901	25098100	8653.06	107.43	2035.25	4.67	1.51	9913	91	2062.96	6.78	1.4	Replicate1 + Replicate2
Chr1	25266201	25266300	375.29	5.73	19.84	1.56	0	418	4	15.17	0	0	Replicate1
Chr1	25332101	25332200	316.56	8.59	28.11	0	0	335	10	27.58	0	0	Replicate1 + Replicate2
Chr1	25357801	25357900	574.39	4.3	224.85	0	1.51	601	10	228.91	0	0	Replicate2
Chr1	25358201	25358300	160.43	12.89	228.16	0	0	133	4	209.61	0	0	Replicate1
Chr1	25400601	25400700	256.4	5.73	61.17	0	0	270	5	74.47	0	0	Replicate1 + Replicate2
Chr1	25505201	25505300	67.32	10.03	21.49	0	0	119	3	33.1	0	0	Replicate1
Chr1	25536601	25536700	584.41	8.59	3.31	0	0	449	11	17.93	1.36	0	Replicate2
Chr1	25613501	25613600	693.28	10.03	135.57	0	0	641	5	89.63	0	0	Replicate1 + Replicate2
Chr1	25641601	25641800	3661.18	21.48	949.01	3.11	0	3249	23	849.45	2.71	2.8	Replicate1 + Replicate2
Chr1	25660001	25660300	1250.47	17.18	828.32	0	1.51	1238	17	619.16	4.07	1.4	Replicate1 + Replicate2
Chr1	25722701	25722800	762.03	5.73	107.47	0	0	824	0	102.04	1.36	0	Replicate1
Chr1	25928501	25928600	199.1	5.73	23.15	0	0	230	2	19.31	2.71	0	Replicate1
Chr1	25973801	25973900	240.64	4.3	46.29	0	0	259	9	38.61	0	0	Replicate2
Chr1	26084001	26084100	625.95	1.43	13.23	0	0	767	5	8.27	1.36	0	Replicate2
Chr1	26170101	26170200	12839.9	27.22	1479.73	6.23	0	11270	36	1399.67	1.36	1.4	Replicate1 + Replicate2
Chr1	26170401	26170800	2174.36	38.67	907.68	1.56	1.51	2045	36	805.32	0	0	Replicate1 + Replicate2
Chr1	26170401	26170800	2174.36	38.67	907.68	1.56	1.51	2045	36	805.32	0	0	Replicate1 + Replicate2
Chr1	26306901	26307100	1161.67	20.05	330.67	0	0	1519	15	364.05	0	0	Replicate1 + Replicate2
Chr1	26307301	26307400	174.75	7.16	277.76	0	1.51	159	3	268.9	0	0	Replicate1
Chr1	26343701	26343800	187.64	0	24.8	0	0	253	6	27.58	0	0	Replicate2
Chr1	26366801	26366900	236.34	7.16	97.55	0	0	275	3	121.35	0	0	Replicate1
Chr1	26369101	26369200	209.13	10.03	157.07	0	0	264	11	131	2.71	0	Replicate1 + Replicate2
Chr1	26371501	26371600	671.79	5.73	64.48	0	0	657	4	34.47	0	0	Replicate1
Chr1	26510701	26510800	1458.17	40.11	846.5	0	1.51	1117	24	536.42	1.36	1.4	Replicate1 + Replicate2
Chr1	26561201	26561500	912.42	12.89	81.01	0	0	853	8	41.37	0	0	Replicate1 + Replicate2
Chr1	26650801	26650900	633.12	10.03	200.05	1.56	0	767	15	170.99	0	0	Replicate1 + Replicate2
Chr1	26779301	26779400	237.78	4.3	84.32	0	0	172	6	95.15	0	0	Replicate2
Chr1	26780501	26780700	1872.14	20.06	307.52	1.56	3.02	1898	34	302	2.72	7	Replicate1 + Replicate2
Chr1	26780901	26781100	2109.91	20.05	474.51	1.56	1.51	2423	16	337.85	0	0	Replicate1 + Replicate2
Chr1	26880301	26880400	189.08	0	4.96	0	0	148	5	8.27	0	0	Replicate2
Chr1	26881101	26881400	2648.5	53	896.1	0	0	2320	27	652.26	4.07	0	Replicate1 + Replicate2
Chr1	27186801	27186900	48.7	4.3	13.23	0	0	33	5	13.79	0	0	Replicate2
Chr1	27241101	27241200	67.32	7.16	41.33	0	0	69	1	45.51	0	0	Replicate1
Chr1	27428501	27428600	441.18	5.73	125.65	0	0	467	4	113.08	0	0	Replicate1
Chr1	27429201	27429400	210.56	8.59	180.21	1.56	0	289	12	162.72	0	0	Replicate1 + Replicate2
Chr1	27440601	27440800	1251.9	24.35	279.41	0	0	1195	14	256.49	0	0	Replicate1 + Replicate2
Chr1	27710501	27710700	1592.82	18.62	515.84	0	0	2228	14	409.56	2.71	1.4	Replicate1 + Replicate2
Chr1	27972801	27972900	333.75	14.32	120.69	1.56	0	422	11	99.29	0	0	Replicate1 + Replicate2
Chr1	28051501	28051600	2353.42	10.03	114.08	0	0	2601	14	95.15	1.36	0	Replicate1 + Replicate2
Chr1	28105501	28105700	2344.82	25.78	54.56	0	1.51	2349	27	51.02	0	0	Replicate1 + Replicate2
Chr1	28161501	28161600	13586.2	25.78	1653.33	3.11	0	7737	31	1485.17	1.36	1.4	Replicate1 + Replicate2
Chr1	28332001	28332100	230.61	11.46	171.95	0	0	300	5	176.51	0	0	Replicate1 + Replicate2
Chr1	28526901	28527000	505.63	10.03	85.97	0	3.01	679	4	71.71	0	1.4	Replicate1
Chr1	28527501	28527600	362.39	5.73	34.72	0	0	350	0	17.93	0	1.4	Replicate1
Chr1	28527601	28527700	70.19	0	8.27	0	0	112	6	22.06	0	0	Replicate2
Chr1	28731901	28732000	690.41	5.73	61.17	0	0	508	4	38.61	0	0	Replicate1
Chr1	28750101	28750200	643.14	7.16	152.11	0	0	612	7	137.9	1.36	0	Replicate1 + Replicate2
Chr1	28836501	28836600	11.46	2.86	176.91	1.56	1.51	7	6	162.72	0	0	Replicate2
Chr1	28891501	28891600	452.63	7.16	231.47	0	0	465	9	209.61	1.36	0	Replicate1 + Replicate2
Chr1	28912701	28912800	322.29	10.03	57.87	0	0	360	3	64.81	0	0	Replicate1
Chr1	29244101	29244200	293.64	4.3	183.52	0	0	369	5	164.1	0	0	Replicate2
Chr1	29244501	29244600	2270.34	53	1124.26	0	0	1857	28	830.15	4.07	1.4	Replicate1 + Replicate2
Chr1	29263401	29263700	2098.45	20.05	142.19	1.56	0	1921	28	96.52	0	0	Replicate1 + Replicate2
Chr1	29306801	29306900	11.46	2.86	603.47	0	1.51	6	8	575.04	1.36	0	Replicate2
Chr1	29312801	29312900	31.51	7.16	36.37	0	0	42	2	34.47	0	0	Replicate1
Chr1	29319401	29319500	156.13	4.3	95.89	0	0	181	8	97.91	1.36	0	Replicate2
Chr1	29319601	29320100	1628.62	35.8	522.45	1.56	0	1696	19	388.87	2.72	0	Replicate1 + Replicate2
Chr1	29380601	29380700	335.18	8.59	19.84	0	0	385	4	12.41	0	0	Replicate1
Chr1	29474601	29474700	981.19	11.46	257.92	0	0	789	15	190.3	0	0	Replicate1 + Replicate2
Chr1	29479401	29479500	222.02	8.59	211.63	0	0	286	3	184.78	0	0	Replicate1
Chr1	29481401	29481500	44.4	5.73	8.27	0	0	43	2	1.38	0	0	Replicate1
Chr1	29611501	29611700	1310.64	17.19	646.45	1.56	0	1271	9	576.41	1.36	0	Replicate1 + Replicate2
Chr1	29612301	29612400	5948.71	5.73	176.91	1.56	0	4070	6	177.89	0	1.4	Replicate1 + Replicate2
Chr1	29774301	29774400	641.71	15.76	266.19	0	0	614	8	242.7	0	0	Replicate1 + Replicate2
Chr1	29984301	29984400	966.86	4.3	61.17	0	0	1109	8	96.53	0	0	Replicate2
Chr1	30200201	30200300	2496.65	11.46	205.01	0	0	1953	18	205.47	0	0	Replicate1 + Replicate2
Chr1	30251801	30252100	922.46	10.02	216.59	1.56	0	909	23	249.6	0	0	Replicate1 + Replicate2
Chr1	30252301	30252400	348.07	22.92	325.71	1.56	0	362	16	278.55	0	0	Replicate1 + Replicate2
Chr1	30254101	30254300	13475.9	30.08	1653.33	6.23	0	11725	40	1566.52	1.36	1.4	Replicate1 + Replicate2
Chr1	30254501	30254800	926.76	21.48	451.36	0	1.51	1057	20	408.19	0	0	Replicate1 + Replicate2
Chr2	11701	11800	309.4	5.73	418.29	0	0	376	1	373.7	0	0	Replicate1
Chr2	12501	12600	222.02	5.73	52.91	0	0	179	1	42.75	0	0	Replicate1
Chr2	13001	13100	75.92	7.16	44.64	0	0	62	0	42.75	0	0	Replicate1
Chr2	32201	32300	244.94	5.73	140.53	0	0	274	0	153.07	0	0	Replicate1
Chr2	67101	67200	123.19	1.43	290.99	0	1.51	142	9	231.67	0	1.4	Replicate2
Chr2	67301	67500	3205.69	32.94	2766.02	3.12	3.01	3014	34	2624.21	5.43	11.2	Replicate1 + Replicate2
Chr2	163401	163500	411.1	12.89	178.56	0	0	440	4	162.72	0	0	Replicate1
Chr2	171601	171700	106	2.86	13.23	0	0	105	6	9.65	0	0	Replicate2
Chr2	184001	184100	393.91	5.73	59.52	1.56	0	577	7	68.95	0	1.4	Replicate1 + Replicate2
Chr2	205201	205300	159	7.16	11.57	0	0	245	9	8.27	0	0	Replicate1
Chr2	240901	241200	681.81	10.02	955.62	0	0	899	24	1140.42	1.36	0	Replicate1 + Replicate2
Chr2	241501	241600	409.66	5.73	21.49	0	0	467	1	11.03	0	0	Replicate1
Chr2	254301	254400	164.72	11.46	19.84	0	0	182	4	23.44	0	0	Replicate1
Chr2	275801	275900	826.49	18.62	176.91	0	1.51	973	13	170.99	0	0	Replicate1 + Replicate2
Chr2	276801	276900	362.39	1.43	152.11	0	0	420	8	106.18	0	0	Replicate2
Chr2	303301	303400	820.76	11.46	173.6	0	0	838	8	173.75	0	0	Replicate1 + Replicate2
Chr2	305801	305900	216.29	10.03	13.23	0	0	320	12	12.41	0	0	Replicate1 + Replicate2
Chr2	314701	315000	1254.78	22.92	248.01	0	0	1592	21	248.21	0	0	Replicate1 + Replicate2
Chr2	362501	362600	525.69	4.3	33.07	0	0	491	6	28.96	1.36	0	Replicate2
Chr2	368401	368500	515.66	11.46	29.76	0	0	488	5	31.72	0	0	Replicate1 + Replicate2
Chr2	379401	379500	320.86	5.73	74.4	0	0	357	10	103.42	2.71	0	Replicate1 + Replicate2
Chr2	395201	395300	207.7	5.73	148.8	0	0	244	2	209.61	0	0	Replicate1
Chr2	395301	395400	703.3	4.3	51.25	0	0	710	6	63.43	0	0	Replicate2
Chr2	395601	395800	378.15	11.46	252.96	0	0	492	13	223.4	0	0	Replicate1 + Replicate2
Chr2	400201	400300	123.19	5.73	14.88	0	0	134	5	19.31	0	0	Replicate1 + Replicate2
Chr2	402701	403100	2121.36	18.62	613.39	1.56	4.53	2256	28	628.81	6.79	1.4	Replicate1 + Replicate2
Chr2	407401	407600	343.77	4.29	23.15	0	0	339	14	34.48	0	0	Replicate2
Chr2	429201	429300	971.16	12.89	44.64	0	0	1206	16	45.51	0	0	Replicate1 + Replicate2
Chr2	440401	440500	653.17	1.43	42.99	0	0	541	6	24.82	0	0	Replicate2
Chr2	444901	445000	557.2	21.49	142.19	0	0	709	12	111.7	0	0	Replicate1 + Replicate2
Chr2	472301	472400	338.04	11.46	16.53	0	0	417	4	13.79	0	0	Replicate1
Chr2	492501	492600	174.75	10.03	11.57	0	0	137	4	12.41	0	0	Replicate1
Chr2	500601	500800	1430.96	21.48	448.05	1.56	0	1067	20	417.84	0	0	Replicate1 + Replicate2
Chr2	501401	501500	332.31	2.86	185.17	0	0	339	5	121.35	0	1.4	Replicate2
Chr2	501701	501800	307.96	5.73	84.32	0	0	333	2	79.98	0	0	Replicate1
Chr2	543001	543100	368.12	22.92	330.67	0	0	394	16	279.93	0	0	Replicate1 + Replicate2
Chr2	543301	543400	11509.2	24.35	1297.86	3.11	0	6940	31	1261.77	1.36	1.4	Replicate1 + Replicate2
Chr2	560201	560300	575.82	11.46	97.55	1.56	0	689	9	106.18	1.36	0	Replicate1 + Replicate2
Chr2	566701	566800	878.05	7.16	565.44	1.56	3.01	771	6	402.66	0	0	Replicate2
Chr2	567001	567100	91.67	7.16	44.64	0	0	124	0	45.51	0	0	Replicate1
Chr2	567501	567600	242.07	1.43	355.47	0	0	221	7	300.62	0	1.4	Replicate2
Chr2	568101	568200	173.32	8.59	71.09	0	0	198	2	75.84	0	0	Replicate1
Chr2	571201	571300	148.97	7.16	201.71	1.56	0	207	8	238.56	0	2.8	Replicate1 + Replicate2
Chr2	572201	572300	234.91	5.73	158.72	0	0	250	2	159.96	0	2.8	Replicate1
Chr2	575201	575300	257.83	1.43	244.69	0	0	379	6	231.67	1.36	1.4	Replicate2
Chr2	580501	580600	399.64	8.59	272.8	0	0	389	10	210.98	0	1.4	Replicate1 + Replicate2
Chr2	581701	581800	355.23	4.3	405.07	0	1.51	324	8	362.67	0	1.4	Replicate2
Chr2	582001	582500	1141.62	32.94	1286.3	0	1.51	1337	45	1201.08	0	2.8	Replicate1 + Replicate2
Chr2	594301	594400	249.24	5.73	77.71	0	0	276	8	86.88	0	0	Replicate1 + Replicate2
Chr2	603501	603600	693.28	11.46	66.13	0	0	777	13	71.71	0	0	Replicate1 + Replicate2
Chr2	612801	612900	674.66	7.16	403.41	0	0	691	10	313.03	0	1.4	Replicate1 + Replicate2
Chr2	631101	631200	1743.22	14.32	524.11	0	0	2180	21	423.35	1.36	0	Replicate1 + Replicate2
Chr2	637001	637100	107.43	0	21.49	0	0	116	5	24.82	0	0	Replicate2
Chr2	708101	708400	1352.17	7.16	289.33	0	0	1162	13	237.19	0	0	Replicate2
Chr2	708701	708800	368.12	5.73	120.69	0	0	335	7	104.8	1.36	0	Replicate1 + Replicate2
Chr2	713401	713500	222.02	8.59	107.47	0	0	248	3	91.01	0	0	Replicate1
Chr2	713701	713800	47.27	1.43	66.13	0	0	89	7	38.61	1.36	0	Replicate2
Chr2	716001	716100	136.08	1.43	19.84	0	0	203	5	19.31	0	0	Replicate2
Chr2	762401	762500	491.31	2.86	104.16	0	0	756	8	119.97	0	0	Replicate2
Chr2	768401	768500	438.31	4.3	14.88	0	0	511	5	22.06	0	0	Replicate2
Chr2	808301	808400	512.8	1.43	256.27	0	0	402	6	216.5	0	0	Replicate2
Chr2	825401	825500	170.45	5.73	135.57	0	0	253	10	111.7	0	0	Replicate1 + Replicate2
Chr2	826101	826200	2482.33	57.3	1248.26	0	0	2039	34	900.48	1.36	1.4	Replicate1 + Replicate2
Chr2	910701	910800	67.32	1.43	21.49	0	0	67	5	5.52	0	0	Replicate2
Chr2	912101	912200	189.08	7.16	42.99	0	0	162	3	52.4	0	0	Replicate1
Chr2	912701	913000	2889.12	32.94	1435.09	0	0	3179	20	1423.12	6.78	1.4	Replicate1
Chr2	913801	914500	2233.1	31.51	2200.58	0	7.54	2584	48	1902.99	4.08	1.4	Replicate1 + Replicate2
Chr2	913801	914500	2233.1	31.51	2200.58	0	7.54	2584	48	1902.99	4.08	1.4	Replicate1 + Replicate2
Chr2	927501	927600	20.05	5.73	59.52	0	0	19	0	56.54	0	0	Replicate1
Chr2	980301	980400	42.97	1.43	54.56	0	0	64	7	64.81	0	0	Replicate2
Chr2	984101	984200	402.5	7.16	44.64	0	0	359	7	28.96	1.36	0	Replicate1 + Replicate2
Chr2	1010801	1011000	746.28	14.32	246.34	0	0	901	18	202.71	0	1.4	Replicate1 + Replicate2
Chr2	1011301	1011400	134.64	7.16	66.13	0	0	127	6	56.54	0	0	Replicate1 + Replicate2
Chr2	1012101	1012200	136.08	5.73	9.92	0	0	149	1	8.27	0	0	Replicate1
Chr2	1012301	1012400	179.05	1.43	97.55	0	0	235	5	115.83	0	0	Replicate2
Chr2	1012601	1012800	935.35	5.73	256.27	1.56	0	1053	12	300.62	1.36	0	Replicate1 + Replicate2
Chr2	1017601	1017800	451.2	7.16	44.64	0	0	507	14	59.29	0	0	Replicate2
Chr2	1049301	1049400	918.16	7.16	494.35	0	0	1095	5	335.09	0	0	Replicate1 + Replicate2
Chr2	1076301	1076400	1383.69	4.3	228.16	0	0	1590	6	191.68	0	0	Replicate2
Chr2	1078801	1078900	346.64	8.59	147.15	0	0	471	7	158.58	0	0	Replicate1 + Replicate2
Chr2	1089401	1089500	147.54	2.86	85.97	0	0	163	5	86.88	0	0	Replicate2
Chr2	1123801	1123900	774.92	7.16	95.89	0	0	536	1	60.68	0	0	Replicate1
Chr2	1167401	1167500	211.99	5.73	39.68	0	0	277	6	16.55	0	0	Replicate1 + Replicate2
Chr2	1207701	1207900	550.03	11.46	575.36	0	0	715	5	533.66	0	0	Replicate1
Chr2	1208301	1208600	839.38	22.92	1051.52	0	1.51	981	17	925.29	0	2.8	Replicate1 + Replicate2
Chr2	1263801	1264000	555.76	18.62	57.87	0	0	648	14	53.78	2.71	0	Replicate1 + Replicate2
Chr2	1272101	1272200	497.04	5.73	41.33	0	0	496	3	20.68	0	0	Replicate1
Chr2	1293801	1293900	479.85	7.16	218.24	0	0	515	7	183.4	0	0	Replicate1 + Replicate2
Chr2	1303001	1303100	454.07	21.49	337.28	0	0	478	13	330.96	1.36	0	Replicate1 + Replicate2
Chr2	1322001	1322100	1757.54	31.51	705.97	0	1.51	1614	17	490.92	1.36	0	Replicate1 + Replicate2
Chr2	1347301	1347400	641.71	15.76	229.81	0	0	619	8	208.23	0	0	Replicate1 + Replicate2
Chr2	1353301	1353400	113.16	1.43	47.95	0	0	169	6	75.84	0	0	Replicate2
Chr2	1371701	1371800	661.76	5.73	173.6	0	0	797	4	159.96	0	1.4	Replicate1
Chr2	1380701	1380800	148.97	5.73	51.25	0	1.51	125	3	42.75	1.36	0	Replicate1
Chr2	1381101	1381200	130.35	2.86	81.01	0	0	140	7	82.74	0	0	Replicate2
Chr2	1383601	1383700	2740.16	61.59	859.73	1.56	1.51	2039	23	637.09	5.43	0	Replicate1 + Replicate2
Chr2	1388901	1389300	1456.75	21.47	982.08	0	1.51	1529	28	790.16	2.72	0	Replicate1 + Replicate2
Chr2	1393701	1393800	164.72	5.73	24.8	0	0	201	6	17.93	0	0	Replicate1 + Replicate2
Chr2	1395201	1395400	3324.57	17.19	2167.52	1.56	4.52	3898	22	1920.92	1.36	4.2	Replicate1 + Replicate2
Chr2	1397801	1397900	365.26	5.73	81.01	0	1.51	354	3	57.92	0	0	Replicate1
Chr2	1398101	1398200	2085.56	22.92	1278.02	0	0	2286	12	1325.2	2.71	1.4	Replicate1 + Replicate2
Chr2	1399001	1399400	3937.64	31.51	1964.15	1.56	7.54	4644	37	2035.38	5.43	1.4	Replicate1 + Replicate2
Chr2	1410001	1410100	1276.26	5.73	87.63	0	0	1049	3	53.78	2.71	0	Replicate1
Chr2	1413201	1413400	2243.12	18.62	692.75	3.12	1.51	2229	20	650.88	2.72	2.8	Replicate1 + Replicate2
Chr2	1420901	1421000	177.62	7.16	87.63	0	1.51	211	3	82.74	0	0	Replicate1
Chr2	1457101	1457200	1608.57	4.3	110.77	0	0	1280	5	79.98	0	0	Replicate2
Chr2	1459201	1459300	2111.34	12.89	97.55	0	1.51	1935	12	115.83	0	0	Replicate1 + Replicate2
Chr2	1460001	1460300	668.92	17.19	241.39	0	0	592	15	168.24	0	0	Replicate1 + Replicate2
Chr2	1460301	1460400	439.74	5.73	24.8	0	0	260	0	12.41	0	0	Replicate1
Chr2	1546401	1546500	293.64	1.43	104.16	0	0	283	5	67.57	0	0	Replicate2
Chr2	1581101	1581200	54.43	1.43	6.61	0	0	51	5	5.52	0	0	Replicate2
Chr2	1594001	1594100	898.11	8.59	66.13	0	0	963	13	53.78	0	0	Replicate1 + Replicate2
Chr2	1597301	1597400	2469.44	53	992	0	0	2088	29	685.35	1.36	1.4	Replicate1 + Replicate2
Chr2	1617001	1617100	630.25	11.46	90.93	0	0	731	4	71.71	0	0	Replicate1
Chr2	1629701	1630000	4522.05	42.97	4123.4	12.46	7.54	3713	50	3411.61	13.57	16.8	Replicate1 + Replicate2
Chr2	1630401	1630500	641.71	1.43	152.11	0	0	546	7	161.34	0	0	Replicate2
Chr2	1630901	1631000	190.51	1.43	248	0	0	212	6	182.03	0	0	Replicate2
Chr2	1631601	1631700	323.72	2.86	358.77	0	0	250	5	326.82	0	1.4	Replicate2
Chr2	1633801	1633900	252.1	5.73	286.03	0	0	269	1	290.97	0	0	Replicate1
Chr2	1634101	1634200	230.61	5.73	213.28	0	0	209	3	168.24	4.07	0	Replicate1
Chr2	1635501	1635600	90.24	2.86	56.21	0	0	105	5	73.09	0	0	Replicate2
Chr2	1636401	1636700	4840.05	44.4	3972.96	10.9	4.52	3954	51	3196.49	14.92	8.4	Replicate1 + Replicate2
Chr2	1637101	1637200	461.23	1.43	163.68	0	0	643	7	148.93	0	0	Replicate2
Chr2	1637201	1637300	1196.04	12.89	238.08	3.11	1.51	952	8	176.51	4.07	4.2	Replicate1
Chr2	1652501	1652700	1607.14	21.49	454.66	0	0	2161	21	397.15	0	0	Replicate1 + Replicate2
Chr2	1663401	1663500	1369.36	17.19	107.47	0	0	1579	14	96.53	0	0	Replicate1 + Replicate2
Chr2	1669901	1670000	517.09	14.32	125.65	0	0	704	5	108.94	0	0	Replicate1 + Replicate2
Chr2	1691101	1691200	54.43	7.16	165.33	0	0	67	2	158.58	0	0	Replicate1
Chr2	1709701	1709800	694.71	10.03	114.08	0	0	767	9	118.59	0	0	Replicate1 + Replicate2
Chr2	1716001	1716100	75.92	5.73	42.99	0	0	64	3	37.23	0	0	Replicate1
Chr2	1731501	1731600	1234.72	5.73	254.61	0	0	1063	2	226.15	0	0	Replicate1
Chr2	1740801	1740900	60.16	4.3	41.33	0	0	82	8	30.34	0	0	Replicate2
Chr2	1741401	1741700	1522.63	18.62	1717.81	3.12	3.02	1598	12	1409.32	2.72	2.8	Replicate1 + Replicate2
Chr2	1742701	1742800	90.24	7.16	62.83	0	0	111	2	70.33	0	0	Replicate1
Chr2	1748301	1748400	229.18	5.73	155.41	0	0	242	2	153.07	0	0	Replicate1
Chr2	1751001	1751300	819.32	14.32	909.33	0	1.51	919	19	743.28	5.43	1.4	Replicate1 + Replicate2
Chr2	1756201	1756300	379.58	4.3	431.52	0	1.51	345	8	379.22	0	1.4	Replicate2
Chr2	1756501	1756900	1045.65	18.61	1033.34	3.11	1.51	1207	34	981.84	0	1.4	Replicate1 + Replicate2
Chr2	1756501	1757000	1347.88	38.66	1554.14	3.11	3.02	1584	43	1394.16	2.71	4.2	Replicate1 + Replicate2
Chr2	1762801	1762900	1536.95	27.22	1501.22	3.11	0	1449	10	1112.84	4.07	0	Replicate1 + Replicate2
Chr2	1763201	1763300	207.7	1.43	191.79	0	0	187	6	206.85	0	0	Replicate2
Chr2	1765601	1765700	60.16	1.43	19.84	0	0	63	5	20.68	0	0	Replicate2
Chr2	1766401	1766500	1121.56	5.73	170.29	0	0	702	11	183.4	0	0	Replicate1 + Replicate2
Chr2	1779701	1779800	199.1	5.73	47.95	0	0	183	1	56.54	0	0	Replicate1
Chr2	1821701	1821800	800.71	7.16	145.49	0	0	656	2	118.59	0	0	Replicate1
Chr2	1824701	1824800	317.99	7.16	9.92	1.56	0	286	6	11.03	0	0	Replicate1 + Replicate2
Chr2	1839201	1839300	58.73	0	34.72	1.56	0	107	8	39.99	1.36	0	Replicate2
Chr2	1850301	1850400	796.41	4.3	44.64	0	0	928	5	49.64	0	0	Replicate2
Chr2	1850901	1851000	859.43	7.16	69.44	0	0	986	8	60.68	0	0	Replicate1 + Replicate2
Chr2	1878701	1878800	80.21	8.59	51.25	0	0	88	3	68.95	0	0	Replicate1
Chr2	1889901	1890000	136.08	1.43	109.12	0	0	169	5	108.94	0	0	Replicate2
Chr2	1917601	1917700	731.95	12.89	54.56	0	1.51	667	6	45.51	0	0	Replicate1 + Replicate2
Chr2	1937701	1937800	83.08	5.73	8.27	0	0	98	0	5.52	0	0	Replicate1
Chr2	1943001	1943200	981.18	14.32	216.58	0	0	1175	18	205.47	5.43	0	Replicate1 + Replicate2
Chr2	1982901	1983000	638.85	18.62	150.45	0	0	716	11	110.32	0	0	Replicate1 + Replicate2
Chr2	2009701	2009800	127.48	2.86	81.01	0	0	149	5	88.25	0	0	Replicate2
Chr2	2010201	2010500	1031.32	15.75	391.83	3.11	0	1276	21	346.12	1.36	0	Replicate1 + Replicate2
Chr2	2035101	2035200	67.32	4.3	95.89	0	0	66	5	64.81	0	0	Replicate2
Chr2	2042001	2042100	166.16	11.46	95.89	1.56	0	180	7	86.88	0	2.8	Replicate1 + Replicate2
Chr2	2045101	2045200	17.19	0	41.33	0	0	33	5	56.54	0	0	Replicate2
Chr2	2048901	2049000	27.22	0	77.71	0	0	57	5	77.22	0	0	Replicate2
Chr2	2053901	2054200	1469.63	38.68	1074.67	0	1.51	1636	45	910.13	14.93	1.4	Replicate1 + Replicate2
Chr2	2059101	2059200	246.37	2.86	239.73	0	0	341	7	170.99	0	0	Replicate2
Chr2	2063901	2064000	150.4	5.73	56.21	0	0	171	0	45.51	0	0	Replicate1
Chr2	2066601	2066700	179.05	5.73	31.41	0	0	205	3	51.02	0	0	Replicate1
Chr2	2074201	2074300	176.18	5.73	46.29	0	0	155	1	20.68	0	0	Replicate1
Chr2	2074701	2074800	1433.82	12.89	140.53	0	0	1213	3	125.49	0	0	Replicate1
Chr2	2085901	2086000	226.32	7.16	221.55	0	1.51	184	7	177.89	1.36	0	Replicate1 + Replicate2
Chr2	2086301	2086400	61.59	5.73	19.84	0	0	69	2	34.47	0	0	Replicate1
Chr2	2130201	2130300	40.11	5.73	21.49	0	0	42	2	13.79	0	0	Replicate1
Chr2	2140401	2140500	1746.08	7.16	266.19	4.67	6.03	1899	24	257.87	5.43	1.4	Replicate2
Chr2	2149901	2150500	6743.69	103.14	2957.82	6.23	4.52	6761	110	2607.66	8.14	2.8	Replicate1 + Replicate2
Chr2	2155601	2155700	452.63	8.59	46.29	0	0	578	4	81.36	0	0	Replicate1
Chr2	2162601	2162700	830.79	12.89	170.29	0	0	902	12	157.2	0	0	Replicate1 + Replicate2
Chr2	2178601	2178700	141.81	5.73	195.09	0	0	167	1	132.38	0	0	Replicate1
Chr2	2209801	2209900	621.66	7.16	286.03	0	0	964	13	306.13	0	0	Replicate1 + Replicate2
Chr2	2218401	2218500	113.16	5.73	69.44	0	0	108	0	52.4	0	0	Replicate1
Chr2	2220001	2220100	117.46	5.73	62.83	0	0	135	1	51.02	0	0	Replicate1
Chr2	2222901	2223000	259.26	0	76.05	0	0	322	5	91.01	0	0	Replicate2
Chr2	2232301	2232400	471.26	2.86	157.07	0	0	502	10	158.58	0	0	Replicate2
Chr2	2233601	2233700	187.64	1.43	66.13	0	0	226	5	81.36	0	0	Replicate2
Chr2	2260701	2261000	1668.73	31.52	757.23	0	0	1823	27	674.32	1.36	0	Replicate1 + Replicate2
Chr2	2274501	2274600	1796.22	2.86	130.61	0	0	1302	8	89.63	0	0	Replicate2
Chr2	2276101	2276200	190.51	5.73	312.48	0	0	215	5	234.43	0	0	Replicate1 + Replicate2
Chr2	2279501	2279600	310.83	8.59	165.33	0	0	419	5	206.85	1.36	0	Replicate1 + Replicate2
Chr2	2279801	2279900	1794.78	4.3	128.96	0	0	1297	9	86.88	0	0	Replicate2
Chr2	2284201	2284500	1207.5	14.31	322.41	0	1.51	1280	21	343.37	0	0	Replicate1 + Replicate2
Chr2	2293901	2294000	100.27	5.73	16.53	0	0	132	0	9.65	0	0	Replicate1
Chr2	2297101	2297200	713.33	5.73	234.77	0	0	835	5	199.95	0	0	Replicate1 + Replicate2
Chr2	2299501	2299600	44.4	10.03	19.84	0	0	54	0	12.41	0	0	Replicate1
Chr2	2320701	2320800	2104.18	50.13	924.21	0	0	1739	24	599.86	4.07	0	Replicate1 + Replicate2
Chr2	2321801	2321900	340.91	8.59	47.95	0	0	426	6	30.34	0	0	Replicate1 + Replicate2
Chr2	2362801	2363000	306.53	5.72	62.82	0	0	251	11	73.09	0	0	Replicate2
Chr2	2374301	2374400	381.02	1.43	94.24	0	0	317	5	82.74	0	0	Replicate2
Chr2	2400101	2400200	5.73	5.73	8.27	0	0	10	1	2.76	0	0	Replicate1
Chr2	2418701	2418800	35.81	1.43	18.19	0	0	29	6	16.55	0	0	Replicate2
Chr2	2422801	2422900	60.16	5.73	76.05	0	0	87	7	88.25	0	0	Replicate1 + Replicate2
Chr2	2437201	2437300	153.27	7.16	81.01	0	0	153	7	64.81	0	0	Replicate1 + Replicate2
Chr2	2450801	2450900	322.29	1.43	165.33	0	0	230	7	131	1.36	1.4	Replicate2
Chr2	2451201	2451300	233.48	7.16	272.8	0	0	205	5	195.82	0	1.4	Replicate1 + Replicate2
Chr2	2453101	2453200	514.23	2.86	1036.64	1.56	0	522	7	867.38	0	0	Replicate2
Chr2	2453901	2454100	207.69	12.89	256.27	1.56	0	227	11	259.25	0	1.4	Replicate1 + Replicate2
Chr2	2460901	2461000	286.48	2.86	654.72	0	3.01	281	7	620.54	1.36	0	Replicate2
Chr2	2489301	2489400	73.05	1.43	46.29	0	0	97	5	52.4	0	1.4	Replicate2
Chr2	2497601	2497700	173.32	5.73	261.23	0	0	190	4	175.13	0	0	Replicate1
Chr2	2500401	2500500	57.3	2.86	59.52	0	0	70	5	68.95	0	1.4	Replicate2
Chr2	2510701	2510800	75.92	0	31.41	0	0	97	5	31.72	0	0	Replicate2
Chr2	2542201	2542300	35.81	4.3	658.02	1.56	1.51	32	9	631.57	1.36	0	Replicate2
Chr2	2542701	2543200	1276.25	25.77	1158.99	3.11	1.51	1555	29	1093.53	0	1.4	Replicate1 + Replicate2
Chr2	2542701	2543200	1276.25	25.77	1158.99	3.11	1.51	1555	29	1093.53	0	1.4	Replicate1 + Replicate2
Chr2	2543401	2543500	356.66	4.3	428.21	0	1.51	330	8	377.84	0	1.4	Replicate2
Chr2	2544601	2544700	416.83	8.59	282.72	0	0	391	10	209.61	0	1.4	Replicate1 + Replicate2
Chr2	2548401	2548500	584.41	14.32	682.82	0	1.51	721	17	605.37	1.36	0	Replicate1 + Replicate2
Chr2	2548901	2549000	263.56	2.86	186.83	0	0	426	5	210.98	1.36	0	Replicate2
Chr2	2553601	2553700	191.94	5.73	196.75	1.56	0	262	7	227.53	0	2.8	Replicate1 + Replicate2
Chr2	2553901	2554000	200.53	7.16	188.48	0	0	318	4	177.89	1.36	0	Replicate1
Chr2	2558401	2558500	309.4	2.86	347.2	3.11	0	268	6	270.28	0	0	Replicate2
Chr2	2559301	2559400	349.5	5.73	464.59	0	0	260	3	302	1.36	0	Replicate1
Chr2	2604601	2604900	1882.16	21.49	949.01	1.56	0	2000	7	787.4	0	0	Replicate1 + Replicate2
Chr2	2605301	2605400	988.35	8.59	390.19	1.56	0	773	5	337.85	1.36	1.4	Replicate1
Chr2	2605701	2605800	1110.1	12.89	525.76	0	0	955	6	503.33	4.07	1.4	Replicate1
Chr2	2606101	2606200	1233.29	12.89	500.96	0	0	1100	6	435.76	4.07	1.4	Replicate1
Chr2	2609001	2609100	438.31	0	76.05	1.56	0	531	7	70.33	0	0	Replicate2
Chr2	2622901	2623000	393.91	1.43	696.05	0	1.51	310	6	562.63	0	0	Replicate2
Chr2	2623801	2623900	83.08	11.46	147.15	1.56	1.51	86	4	102.04	0	0	Replicate1
Chr2	2689401	2689500	196.24	1.43	115.73	1.56	0	174	5	86.88	0	0	Replicate2
Chr2	2707401	2707500	240.64	4.3	33.07	0	0	316	5	89.63	0	0	Replicate2
Chr2	2820501	2820600	625.95	8.59	137.23	0	0	581	7	143.41	1.36	0	Replicate1 + Replicate2
Chr2	2830101	2830200	171.89	7.16	249.65	1.56	1.51	239	8	253.73	0	0	Replicate1 + Replicate2
Chr2	2902301	2902400	216.29	10.03	358.77	1.56	0	263	10	390.25	0	0	Replicate1 + Replicate2
Chr2	2906901	2907000	121.75	10.03	327.36	1.56	0	153	10	362.67	0	0	Replicate1 + Replicate2
Chr2	2962501	2962600	137.51	5.73	21.49	0	0	149	1	19.31	0	0	Replicate1
Chr2	2963301	2963400	160.43	0	107.47	0	3.01	180	5	62.05	0	0	Replicate2
Chr2	2963801	2964200	4235.57	55.87	1011.84	1.56	6.03	4871	59	838.43	0	0	Replicate1 + Replicate2
Chr2	3014501	3014600	948.24	7.16	745.65	1.56	3.01	850	8	535.05	1.36	0	Replicate2
Chr2	3014701	3014800	190.51	10.03	271.15	0	0	283	4	210.98	0	0	Replicate1
Chr2	3015201	3015300	242.07	1.43	246.35	0	0	220	7	208.23	0	1.4	Replicate2
Chr2	3016001	3016100	290.77	5.73	54.56	0	0	314	1	51.02	0	0	Replicate1
Chr2	3020501	3020600	731.95	7.16	267.84	0	0	880	5	304.76	0	0	Replicate1 + Replicate2
Chr2	3022201	3022300	186.21	4.3	211.63	0	0	190	5	182.03	0	1.4	Replicate2
Chr2	3022701	3022800	191.94	4.3	262.88	0	0	218	11	242.7	0	0	Replicate2
Chr2	3057701	3057800	147.54	17.19	54.56	0	0	197	28	52.4	0	0	Replicate1 + Replicate2
Chr2	3058201	3058300	151.83	17.19	61.17	0	0	197	28	66.19	0	0	Replicate1 + Replicate2
Chr2	3061101	3061200	794.98	5.73	16.53	0	0	838	11	19.31	0	0	Replicate1 + Replicate2
Chr2	3076201	3076300	15.76	5.73	21.49	0	0	21	1	17.93	0	0	Replicate1
Chr2	3092701	3092800	12.89	2.86	664.64	0	1.51	7	8	621.92	1.36	0	Replicate2
Chr2	3110701	3110800	5.73	5.73	254.61	1.56	0	8	3	259.25	0	0	Replicate1
Chr2	3110801	3110900	28.65	2.86	755.57	0	1.51	15	13	781.88	1.36	0	Replicate2
Chr2	3148701	3148800	193.37	10.03	11.57	0	0	179	8	16.55	0	0	Replicate1 + Replicate2
Chr2	3191701	3191800	908.13	1.43	11.57	0	0	1009	5	22.06	0	0	Replicate2
Chr2	3195101	3195300	856.57	4.29	286.02	0	0	735	10	245.46	0	0	Replicate2
Chr2	3197701	3197800	2336.23	63.03	1068.05	0	1.51	2000	36	820.5	2.71	1.4	Replicate1 + Replicate2
Chr2	3198401	3198500	64.46	10.03	23.15	0	0	86	2	15.17	1.36	0	Replicate1
Chr2	3513201	3513300	197.67	8.59	171.95	0	0	216	3	103.42	0	0	Replicate1
Chr2	3539501	3539600	123.19	7.16	59.52	0	0	145	0	45.51	0	0	Replicate1
Chr2	3540101	3540200	504.2	2.86	198.4	0	0	469	10	182.03	0	0	Replicate2
Chr2	3562001	3562100	911	5.73	201.71	0	0	1083	7	194.44	0	0	Replicate1 + Replicate2
Chr2	3564501	3564600	223.45	5.73	71.09	0	0	295	2	42.75	0	0	Replicate1
Chr2	3583901	3584100	860.86	27.21	236.43	3.11	0	937	26	198.58	1.36	0	Replicate1 + Replicate2
Chr2	3605501	3606300	4868.69	93.1	4854.18	9.35	9.04	5347	94	4714.74	16.29	7	Replicate1 + Replicate2
Chr2	3606501	3607400	15508.5	191.94	6745.58	26.46	31.65	16956	195	6675.67	38	14	Replicate1 + Replicate2
Chr2	3607601	3607900	1724.6	44.4	1294.56	12.46	7.54	1918	60	1344.51	6.79	4.2	Replicate1 + Replicate2
Chr2	3614901	3615200	3427.71	134.64	3319.89	18.68	15.07	3375	108	3068.24	31.21	15.4	Replicate1 + Replicate2
Chr2	3615701	3616900	45277.8	339.47	12937.3	52.93	45.19	43595	344	11695.2	89.55	56	Replicate1 + Replicate2
Chr2	3617001	3617300	2635.6	27.21	742.34	0	6.02	2680	16	700.51	6.78	2.8	Replicate1 + Replicate2
Chr2	3617701	3620100	76014	737.68	27981	87.13	76.85	75286	697	26626.8	160.11	76.99	Replicate1 + Replicate2
Chr2	3618001	3620100	74504.3	714.76	25590.2	82.46	76.85	73986	676	24377.7	149.25	76.99	Replicate1 + Replicate2
Chr2	3620301	3620400	2579.73	58.73	2045.17	7.78	3.01	2392	40	1788.54	13.57	12.6	Replicate1
Chr2	3620601	3621300	9761.73	230.61	11249.2	40.47	25.61	9978	196	10123.1	51.56	37.8	Replicate1 + Replicate2
Chr2	3621501	3621600	28004.6	117.46	7168.83	9.34	22.6	25418	126	6428.82	23.07	16.8	Replicate1 + Replicate2
Chr2	3621801	3622700	38402.3	362.39	11624.5	54.48	45.2	38210	344	10751.9	93.63	28	Replicate1 + Replicate2
Chr2	3623101	3623900	15769.2	170.45	5232.79	26.46	9.04	16318	157	4575.48	47.48	21	Replicate1 + Replicate2
Chr2	3623901	3624000	522.82	10.03	451.36	6.23	1.51	491	17	450.93	2.71	2.8	Replicate2
Chr2	3624301	3624700	8564.25	111.72	3553.01	15.57	13.56	7138	120	3379.89	20.35	15.4	Replicate1 + Replicate2
Chr2	3625001	3625700	23465.4	246.38	8455.14	35.8	24.11	22433	231	7598.2	55.63	35	Replicate1 + Replicate2
Chr2	3625901	3627400	50318.4	540.01	14233.5	48.26	52.74	51807	532	13241	116.69	60.2	Replicate1 + Replicate2
Chr2	3625901	3627400	50318.4	540.01	14233.5	48.26	52.74	51807	532	13241	116.69	60.2	Replicate1 + Replicate2
Chr2	3627701	3628000	813.6	24.35	701.01	1.56	4.52	996	37	803.95	5.43	1.4	Replicate1 + Replicate2
Chr2	3663701	3663800	315.13	7.16	196.75	1.56	1.51	270	3	117.21	0	0	Replicate1
Chr2	3682501	3682800	200.53	2.86	233.12	1.56	0	223	10	228.91	0	1.4	Replicate2
Chr2	3715801	3715900	296.5	7.16	128.96	1.56	1.51	248	3	77.22	0	0	Replicate1
Chr2	3718201	3718300	159	11.46	147.15	3.11	4.52	146	18	182.03	5.43	1.4	Replicate2
Chr2	3751201	3751300	287.91	0	443.09	0	0	210	5	343.37	0	0	Replicate2
Chr2	3763901	3764000	201.97	7.16	252.96	0	0	192	5	164.1	0	0	Replicate1 + Replicate2
Chr2	3764201	3764300	224.89	5.73	315.79	1.56	0	251	7	227.53	1.36	1.4	Replicate1 + Replicate2
Chr2	3766801	3766900	38.67	0	47.95	0	0	56	5	71.71	0	0	Replicate2
Chr2	3771801	3771900	156.13	1.43	231.47	1.56	0	144	6	155.83	0	0	Replicate2
Chr2	3814301	3814400	166.16	5.73	52.91	0	0	181	1	38.61	0	0	Replicate1
Chr2	3829501	3829600	4.3	5.73	14.88	0	0	11	1	9.65	0	0	Replicate1
Chr2	3866201	3866300	163.29	5.73	257.92	0	0	168	4	161.34	0	0	Replicate1
Chr2	3872901	3873000	34.38	1.43	87.63	0	0	61	8	91.01	0	1.4	Replicate2
Chr2	3882601	3882700	234.91	5.73	28.11	0	0	313	6	78.6	0	0	Replicate1 + Replicate2
Chr2	3944701	3945000	474.11	14.32	256.27	0	0	513	14	176.51	0	0	Replicate1 + Replicate2
Chr2	3962901	3963000	266.42	2.86	77.71	0	0	238	7	56.54	0	0	Replicate2
Chr2	3967601	3967700	204.83	7.16	292.64	0	0	228	5	213.74	0	0	Replicate1 + Replicate2
Chr2	3969701	3969800	153.27	5.73	66.13	0	0	193	3	44.13	0	0	Replicate1
Chr2	3971601	3971700	34.38	1.43	56.21	0	0	41	6	78.6	0	1.4	Replicate2
Chr2	3976801	3976900	356.66	2.86	236.43	0	0	381	6	170.99	0	0	Replicate2
Chr2	4024601	4024700	461.23	7.16	229.81	0	0	480	3	259.25	0	0	Replicate1
Chr2	4025401	4025500	108.86	5.73	206.67	0	0	163	6	157.2	0	0	Replicate1 + Replicate2
Chr2	4025801	4025900	378.15	5.73	56.21	0	0	391	4	62.05	0	1.4	Replicate1
Chr2	4077901	4078000	389.61	7.16	120.69	0	0	413	2	114.46	0	0	Replicate1
Chr2	4086401	4086500	1529.79	22.92	3597.64	1.56	3.01	2449	38	3759.11	13.57	2.8	Replicate1 + Replicate2
Chr2	4130401	4130500	763.46	8.59	621.65	1.56	1.51	739	15	725.35	2.71	0	Replicate1 + Replicate2
Chr2	4133101	4133200	177.62	1.43	138.88	0	3.01	157	5	115.83	0	0	Replicate2
Chr2	4134201	4134300	1598.55	7.16	284.37	0	0	1406	14	252.35	0	0	Replicate1 + Replicate2
Chr2	4184801	4184900	31.51	11.46	107.47	0	0	34	2	86.88	0	0	Replicate1
Chr2	4212901	4213000	691.84	5.73	84.32	0	0	868	4	115.83	0	0	Replicate1
Chr2	4214701	4214800	359.53	2.86	87.63	0	0	466	6	62.05	0	0	Replicate2
Chr2	4216801	4216900	333.75	1.43	72.75	0	0	449	7	55.16	0	0	Replicate2
Chr2	4217201	4217300	58.73	2.86	110.77	0	0	74	6	70.33	0	0	Replicate2
Chr2	4217301	4217400	181.91	7.16	224.85	0	0	188	2	165.48	0	0	Replicate1
Chr2	4220001	4220100	227.75	1.43	104.16	0	0	299	5	117.21	0	0	Replicate2
Chr2	4220501	4220600	348.07	5.73	29.76	0	0	392	3	63.43	0	0	Replicate1
Chr2	4257301	4257400	432.58	2.86	715.89	1.56	0	441	6	590.2	0	0	Replicate2
Chr2	4258101	4258200	75.92	8.59	271.15	0	0	84	3	169.61	0	0	Replicate1
Chr2	4286501	4286600	11.46	5.73	14.88	0	0	15	1	11.03	0	0	Replicate1
Chr2	4301601	4301700	131.78	5.73	267.84	1.56	0	178	9	190.3	0	0	Replicate1 + Replicate2
Chr2	4306101	4306200	272.15	4.3	261.23	0	0	231	6	222.02	0	0	Replicate2
Chr2	4307501	4307600	552.9	10.03	186.83	0	0	560	11	206.85	0	0	Replicate1 + Replicate2
Chr2	4354001	4354100	97.4	1.43	102.51	0	0	98	5	66.19	0	0	Replicate2
Chr2	4355601	4355700	979.75	0	57.87	0	0	1110	6	63.43	1.36	0	Replicate2
Chr2	4379201	4379300	290.77	4.3	100.85	0	0	273	7	67.57	0	0	Replicate2
Chr2	4398401	4398500	42.97	2.86	81.01	0	0	62	6	84.12	0	1.4	Replicate2
Chr2	4445401	4445500	124.62	8.59	175.25	0	0	129	2	158.58	1.36	0	Replicate1
Chr2	4473501	4473600	107.43	10.03	51.25	0	0	138	6	66.19	0	1.4	Replicate1 + Replicate2
Chr2	4474401	4474500	514.23	27.22	100.85	0	0	529	23	75.84	0	0	Replicate1 + Replicate2
Chr2	4490801	4490900	83.08	4.3	74.4	0	0	94	7	75.84	0	0	Replicate2
Chr2	4500501	4500600	51.57	1.43	64.48	0	0	62	7	57.92	0	1.4	Replicate2
Chr2	4511701	4511800	61.59	5.73	44.64	0	0	79	3	52.4	0	0	Replicate1
Chr2	4514001	4514100	144.67	5.73	198.4	0	0	110	1	137.9	0	1.4	Replicate1
Chr2	4516601	4516700	224.89	7.16	295.95	0	0	218	5	215.12	0	1.4	Replicate1 + Replicate2
Chr2	4516901	4517000	249.24	5.73	360.43	1.56	0	294	6	277.18	1.36	1.4	Replicate1 + Replicate2
Chr2	4521101	4521200	121.75	5.73	153.76	0	0	89	1	100.67	0	0	Replicate1
Chr2	4526101	4526200	222.02	4.3	44.64	0	0	287	6	77.22	0	0	Replicate2
Chr2	4558601	4558900	1197.47	8.59	343.9	4.67	0	1211	22	319.92	0	0	Replicate2
Chr2	4559801	4559900	353.8	4.3	557.17	0	0	300	6	526.77	1.36	1.4	Replicate2
Chr2	4562401	4562500	101.7	5.73	39.68	0	0	83	2	27.58	0	0	Replicate1
Chr2	4564901	4565000	127.48	2.86	307.52	0	1.51	143	9	233.05	0	1.4	Replicate2
Chr2	4565101	4565300	3331.74	40.11	3958.06	6.23	3.01	2656	25	3356.45	12.21	8.4	Replicate1
Chr2	4565701	4565800	95.97	1.43	57.87	3.11	0	106	9	78.6	1.36	0	Replicate2
Chr2	4565901	4566000	116.02	7.16	87.63	0	0	106	4	66.19	0	0	Replicate1
Chr2	4596101	4596200	570.09	5.73	11.57	0	0	600	1	17.93	0	0	Replicate1
Chr2	4618001	4618100	53	2.86	90.93	3.11	0	57	5	52.4	0	0	Replicate2
Chr2	4674901	4675000	111.73	5.73	28.11	0	0	120	0	24.82	0	0	Replicate1
Chr2	4709701	4709800	489.88	2.86	224.85	0	0	454	11	208.23	0	0	Replicate2
Chr2	4733701	4733800	15.76	4.3	335.63	3.11	0	4	10	321.3	0	0	Replicate2
Chr2	4759201	4759300	1064.27	7.16	24.8	0	0	972	4	16.55	0	0	Replicate1
Chr2	4796301	4796400	1114.4	22.92	345.55	0	0	1508	25	368.19	0	0	Replicate1 + Replicate2
Chr2	4887701	4888000	819.33	12.89	398.45	1.56	0	927	17	317.17	1.36	0	Replicate1 + Replicate2
Chr2	4936201	4936300	455.5	1.43	945.7	1.56	0	437	6	758.44	0	0	Replicate2
Chr2	4937101	4937200	34.38	4.3	94.24	1.56	0	47	5	85.5	0	0	Replicate2
Chr2	4938501	4938600	943.94	7.16	77.71	0	4.52	1031	8	81.36	0	0	Replicate2
Chr2	4947601	4947700	167.59	25.78	209.97	0	0	216	31	153.07	1.36	0	Replicate1 + Replicate2
Chr2	4948201	4948300	350.94	17.19	147.15	1.56	0	512	29	119.97	0	0	Replicate1 + Replicate2
Chr2	4959501	4959600	97.4	5.73	77.71	0	0	80	1	53.78	0	1.4	Replicate1
Chr2	4965701	4965800	471.26	2.86	299.25	0	0	531	7	195.82	0	0	Replicate2
Chr2	4966501	4966600	459.8	1.43	289.33	0	0	522	6	182.03	0	0	Replicate2
Chr2	4978601	4978700	207.7	7.16	117.39	1.56	1.51	267	3	113.08	0	0	Replicate1
Chr2	4989801	4989900	60.16	5.73	14.88	0	0	76	3	15.17	0	0	Replicate1
Chr2	5011101	5011200	75.92	7.16	29.76	0	0	87	0	23.44	0	0	Replicate1
Chr2	5022401	5022500	10.03	1.43	299.25	0	0	1	7	344.75	0	0	Replicate2
Chr2	5023601	5023700	259.26	18.62	31.41	0	0	218	14	41.37	0	0	Replicate1 + Replicate2
Chr2	5037701	5037800	1148.78	18.62	623.31	0	1.51	1111	13	559.87	0	0	Replicate1 + Replicate2
Chr2	5038101	5038200	773.49	15.76	396.8	0	0	840	9	328.2	0	0	Replicate1 + Replicate2
Chr2	5043101	5043200	57.3	5.73	122.35	0	0	58	0	108.94	0	0	Replicate1
Chr2	5048001	5048100	210.56	5.73	226.51	1.56	0	146	5	212.36	0	0	Replicate1 + Replicate2
Chr2	5048301	5048400	338.04	1.43	128.96	0	0	307	5	148.93	0	0	Replicate2
Chr2	5052201	5052500	2122.8	18.62	760.54	0	4.52	2228	39	670.19	2.72	0	Replicate1 + Replicate2
Chr2	5056801	5057000	236.35	27.22	274.46	0	1.51	301	31	193.06	1.36	0	Replicate1 + Replicate2
Chr2	5057901	5058000	184.78	7.16	120.69	0	0	241	1	144.79	0	0	Replicate1
Chr2	5060501	5060800	1234.71	20.05	272.8	0	0	1649	16	270.28	0	1.4	Replicate1 + Replicate2
Chr2	5061201	5061300	17.19	5.73	56.21	0	0	43	0	53.78	0	0	Replicate1
Chr2	5099901	5100000	24.35	2.86	634.88	0	1.51	17	9	606.75	1.36	0	Replicate2
Chr2	5126101	5126200	12.89	5.73	16.53	0	0	21	1	11.03	0	0	Replicate1
Chr2	5191401	5191500	137.51	2.86	132.27	0	0	191	5	126.87	0	1.4	Replicate2
Chr2	5213601	5213700	729.09	4.3	104.16	1.56	0	986	8	166.86	0	0	Replicate2
Chr2	5220901	5221200	3215.71	25.78	2192.31	1.56	4.52	2936	30	2054.68	2.72	4.2	Replicate1 + Replicate2
Chr2	5221701	5221800	627.39	4.3	77.71	0	0	633	7	68.95	0	0	Replicate2
Chr2	5226201	5226400	2972.21	24.35	3104.95	1.56	3.01	2739	42	3146.84	1.36	2.8	Replicate1 + Replicate2
Chr2	5226601	5226700	57.3	5.73	72.75	0	0	129	5	67.57	0	0	Replicate1 + Replicate2
Chr2	5231401	5231600	2996.55	24.35	3098.34	1.56	3.01	2767	42	3145.46	1.36	2.8	Replicate1 + Replicate2
Chr2	5231801	5231900	68.75	5.73	74.4	0	0	137	5	68.95	0	0	Replicate1 + Replicate2
Chr2	5263901	5264000	51.57	0	41.33	0	0	45	7	41.37	0	0	Replicate2
Chr2	5270601	5270700	53	0	34.72	0	0	53	7	31.72	0	0	Replicate2
Chr2	5272601	5272700	103.13	1.43	38.03	0	0	97	5	27.58	0	0	Replicate2
Chr2	5277901	5278000	80.21	5.73	201.71	0	0	135	1	193.06	0	0	Replicate1
Chr2	5331701	5331800	1326.39	15.76	1567.36	1.56	0	1255	17	1485.17	2.71	2.8	Replicate1 + Replicate2
Chr2	5337501	5337600	1347.88	17.19	1550.82	1.56	0	1275	18	1493.44	2.71	2.8	Replicate1 + Replicate2
Chr2	5363801	5363900	375.29	5.73	148.8	0	0	414	2	92.39	0	0	Replicate1
Chr2	5365301	5365500	130.35	7.16	52.9	0	0	142	13	49.64	0	1.4	Replicate1 + Replicate2
Chr2	5377301	5377400	37.24	2.86	23.15	0	0	33	6	22.06	0	0	Replicate2
Chr2	5433001	5433100	509.93	5.73	52.91	0	0	449	0	37.23	0	0	Replicate1
Chr2	5442801	5442900	75.92	1.43	67.79	0	0	92	6	71.71	0	1.4	Replicate2
Chr2	5465801	5466100	717.63	15.75	157.06	1.56	0	785	9	131.01	0	0	Replicate1 + Replicate2
Chr2	5489901	5490200	289.35	11.46	157.07	0	0	367	3	143.41	0	0	Replicate1
Chr2	5495901	5496000	97.4	4.3	44.64	0	0	106	10	27.58	0	0	Replicate2
Chr2	5502201	5502300	173.32	2.86	162.03	0	1.51	207	8	155.83	0	0	Replicate2
Chr2	5509501	5509600	252.1	2.86	61.17	0	1.51	294	9	38.61	0	0	Replicate2
Chr2	5515801	5515900	487.01	5.73	51.25	0	0	376	2	44.13	0	0	Replicate1
Chr2	5557401	5557500	696.14	11.46	64.48	1.56	0	961	21	56.54	1.36	0	Replicate1 + Replicate2
Chr2	5557701	5558200	4073.72	70.19	2065.01	6.22	3.01	4239	77	1813.35	6.78	1.4	Replicate1 + Replicate2
Chr2	5557701	5558200	4073.72	70.19	2065.01	6.22	3.01	4239	77	1813.35	6.78	1.4	Replicate1 + Replicate2
Chr2	5565801	5565900	312.26	1.43	638.18	0	1.51	291	6	557.11	0	0	Replicate2
Chr2	5566501	5566800	544.31	11.46	707.62	3.12	0	531	14	569.52	2.71	0	Replicate1 + Replicate2
Chr2	5572701	5572800	368.12	5.73	180.21	0	1.51	408	2	162.72	0	0	Replicate1
Chr2	5576001	5576100	160.43	5.73	257.92	0	0	175	4	175.13	0	0	Replicate1
Chr2	5577901	5578000	330.88	1.43	634.88	0	1.51	303	7	581.93	0	0	Replicate2
Chr2	5578601	5578900	528.56	14.33	737.38	3.12	0	531	16	564	2.71	0	Replicate1 + Replicate2
Chr2	5598701	5598800	319.42	4.3	62.83	0	1.51	377	10	48.26	0	2.8	Replicate2
Chr2	5606301	5606400	1048.51	7.16	338.93	0	0	920	14	365.43	0	0	Replicate1 + Replicate2
Chr2	5607401	5607600	880.92	22.91	1130.88	0	0	1030	23	1054.92	1.36	0	Replicate1 + Replicate2
Chr2	5627801	5627900	127.48	5.73	62.83	0	0	138	0	55.16	0	0	Replicate1
Chr2	5636601	5636700	415.39	5.73	115.73	0	0	387	4	97.91	0	0	Replicate1
Chr2	5656901	5657000	121.75	8.59	171.95	1.56	0	112	3	208.23	0	0	Replicate1
Chr2	5657301	5657400	369.56	8.59	175.25	0	0	307	1	162.72	0	0	Replicate1
Chr2	5659501	5659600	209.13	7.16	147.15	0	0	205	1	147.55	0	0	Replicate1
Chr2	5660001	5660100	454.07	4.3	171.95	1.56	0	393	5	176.51	0	0	Replicate2
Chr2	5723901	5724000	630.25	14.32	9.92	0	0	483	5	8.27	0	0	Replicate2
Chr2	5733901	5734000	77.35	5.73	9.92	0	0	64	3	11.03	0	0	Replicate1
Chr2	5761701	5761900	458.37	11.46	183.52	0	0	515	3	128.24	0	0	Replicate1
Chr2	5765701	5765800	85.94	2.86	18.19	0	0	132	8	28.96	1.36	0	Replicate2
Chr2	5774801	5775000	568.66	8.59	124	0	0	587	18	137.9	0	0	Replicate1 + Replicate2
Chr2	5779201	5779300	51.57	0	31.41	0	0	45	7	28.96	0	0	Replicate2
Chr2	5780301	5780400	1385.12	21.49	1853.38	1.56	1.51	1356	22	1799.57	2.71	5.6	Replicate1 + Replicate2
Chr2	5786701	5786900	1433.82	22.92	1861.65	1.56	1.51	1396	22	1809.23	2.71	5.6	Replicate1 + Replicate2
Chr2	5792001	5792100	171.89	7.16	4.96	0	0	251	7	9.65	0	0	Replicate2
Chr2	5799501	5799600	42.97	5.73	56.21	0	0	47	3	66.19	0	0	Replicate1
Chr2	5804701	5804800	362.39	11.46	203.36	0	1.51	494	16	190.3	1.36	0	Replicate1 + Replicate2
Chr2	5806701	5806900	8100.16	108.86	2065.01	1.56	1.51	9360	107	2098.81	4.07	1.4	Replicate1 + Replicate2
Chr2	5807701	5808000	4901.64	47.26	4376.36	9.34	6.03	4070	51	3623.97	12.21	12.6	Replicate1 + Replicate2
Chr2	5808401	5808700	936.78	10.02	254.62	1.56	1.51	1048	17	223.4	0	4.2	Replicate1 + Replicate2
Chr2	5811201	5811300	315.13	5.73	403.41	0	0	393	1	372.33	0	0	Replicate1
Chr2	5814301	5814400	130.35	7.16	84.32	0	0	191	7	79.98	0	0	Replicate1 + Replicate2
Chr2	5814601	5814800	1161.66	11.46	279.41	3.11	1.51	1149	15	252.35	0	0	Replicate1 + Replicate2
Chr2	5815001	5815100	317.99	1.43	124	0	0	323	5	85.5	0	0	Replicate2
Chr2	5822401	5822700	1902.21	20.05	866.35	1.56	0	2357	24	908.75	2.72	1.4	Replicate1 + Replicate2
Chr2	5822701	5822800	126.05	5.73	82.67	0	0	130	2	51.02	0	0	Replicate1
Chr2	5823201	5823500	1627.2	20.05	697.7	1.56	0	1736	13	690.88	1.36	0	Replicate1 + Replicate2
Chr2	5829101	5829200	201.97	5.73	1081.28	0	0	180	9	747.41	5.43	5.6	Replicate1
Chr2	5835501	5835600	282.18	8.59	74.4	0	0	411	11	99.29	0	0	Replicate1 + Replicate2
Chr2	5842901	5843000	81.65	11.46	34.72	0	0	101	1	28.96	0	0	Replicate1
Chr2	5843201	5843300	97.4	5.73	13.23	0	0	103	3	8.27	0	0	Replicate1
Chr2	5846601	5846700	3752.86	21.49	47.95	0	0	2098	18	57.92	0	0	Replicate1 + Replicate2
Chr2	5851101	5851400	1582.8	14.32	269.5	1.56	0	955	8	260.63	0	0	Replicate1 + Replicate2
Chr2	5861201	5861300	128.92	5.73	31.41	0	0	221	1	30.34	1.36	0	Replicate1
Chr2	5865801	5865900	140.37	5.73	8.27	0	0	170	3	27.58	0	0	Replicate1
Chr2	5871501	5871700	1385.12	18.62	109.12	0	3.01	1258	22	89.64	1.36	1.4	Replicate1 + Replicate2
Chr2	5872001	5872100	812.16	10.03	137.23	0	0	926	4	124.11	1.36	0	Replicate1
Chr2	5917901	5918000	832.22	7.16	294.29	1.56	0	1014	7	329.58	1.36	0	Replicate1 + Replicate2
Chr2	5950401	5950500	71.62	5.73	52.91	0	0	113	1	49.64	0	0	Replicate1
Chr2	5960201	5960800	1386.56	35.8	1362.34	3.11	0	1595	39	1163.86	2.71	0	Replicate1 + Replicate2
Chr2	5960201	5960800	1386.56	35.8	1362.34	3.11	0	1595	39	1163.86	2.71	0	Replicate1 + Replicate2
Chr2	5961001	5961100	289.34	4.3	295.95	0	0	241	6	273.04	0	1.4	Replicate2
Chr2	5962201	5962300	300.8	5.73	221.55	0	0	279	7	168.24	0	1.4	Replicate1 + Replicate2
Chr2	5966001	5966300	1548.41	20.05	1383.84	0	1.51	1731	25	1209.37	4.07	2.8	Replicate1 + Replicate2
Chr2	5969201	5969300	229.18	5.73	162.03	0	0	245	2	157.2	1.36	2.8	Replicate1
Chr2	5970401	5970700	912.43	8.59	433.17	1.56	0	1074	13	471.62	0	2.8	Replicate1 + Replicate2
Chr2	5975501	5975600	287.91	8.59	297.6	0	0	381	5	199.95	0	0	Replicate1 + Replicate2
Chr2	5990101	5990200	236.34	1.43	143.84	0	0	243	8	144.79	0	0	Replicate2
Chr2	5996401	5996500	111.73	11.46	133.92	0	0	121	2	104.8	0	0	Replicate1
Chr2	5998901	5999000	164.72	1.43	87.63	0	0	142	5	33.1	0	0	Replicate2
Chr2	6002001	6002300	166.15	2.86	188.48	0	0	202	11	133.77	0	0	Replicate2
Chr2	6006001	6006100	219.16	5.73	132.27	0	0	269	1	132.38	0	0	Replicate1
Chr2	6015801	6015900	1002.67	4.3	200.05	0	0	1271	11	238.56	0	0	Replicate2
Chr2	6016901	6017000	280.75	8.59	23.15	0	0	304	8	17.93	0	0	Replicate1 + Replicate2
Chr2	6036501	6036700	797.84	18.62	42.98	1.56	1.51	854	15	35.85	0	0	Replicate1 + Replicate2
Chr2	6044301	6044400	366.69	8.59	186.83	0	0	326	2	139.28	0	0	Replicate1
Chr2	6044601	6044900	466.96	14.32	527.42	1.56	3.02	512	9	641.23	0	7	Replicate1
Chr2	6045101	6045200	97.4	8.59	59.52	0	0	99	2	68.95	0	0	Replicate1
Chr2	6084501	6084600	127.48	5.73	16.53	0	0	173	1	26.2	0	0	Replicate1
Chr2	6084801	6084900	244.94	1.43	33.07	0	0	304	5	49.64	0	0	Replicate2
Chr2	6089001	6089100	163.29	0	19.84	0	0	180	5	16.55	0	0	Replicate2
Chr2	6089701	6089800	627.39	10.03	44.64	0	0	636	7	59.3	0	0	Replicate1 + Replicate2
Chr2	6101501	6101600	485.58	20.05	122.35	0	0	485	12	122.73	0	0	Replicate1 + Replicate2
Chr2	6101901	6102000	57.3	7.16	21.49	0	0	58	3	23.44	0	0	Replicate1
Chr2	6128801	6128900	774.92	11.46	42.99	1.56	0	611	9	39.99	0	0	Replicate1 + Replicate2
Chr2	6130101	6130200	1373.66	20.05	279.41	0	0	1278	15	209.61	0	0	Replicate1 + Replicate2
Chr2	6130401	6130600	1734.62	18.62	1081.28	1.56	1.51	1580	26	987.36	1.36	1.4	Replicate1 + Replicate2
Chr2	6130801	6130900	1077.16	18.62	97.55	1.56	0	1285	24	86.88	1.36	0	Replicate1 + Replicate2
Chr2	6144701	6144800	322.29	7.16	249.65	0	0	346	0	172.37	0	0	Replicate1
Chr2	6155401	6155500	406.8	4.3	128.96	0	0	595	8	129.62	0	0	Replicate2
Chr2	6177001	6177100	597.31	2.86	195.09	0	0	551	7	135.14	0	0	Replicate2
Chr2	6179901	6180000	1607.14	58.73	1268.1	4.67	1.51	1895	37	1282.45	0	0	Replicate1 + Replicate2
Chr2	6186401	6186500	170.45	1.43	51.25	0	0	163	6	49.64	0	0	Replicate2
Chr2	6206101	6206200	1392.28	12.89	92.59	0	0	1414	14	60.68	0	0	Replicate1 + Replicate2
Chr2	6206701	6206800	2069.8	28.65	686.13	0	1.51	2084	17	450.93	2.71	0	Replicate1 + Replicate2
Chr2	6207001	6207100	2274.63	18.62	529.07	0	3.01	1552	13	398.53	0	0	Replicate1 + Replicate2
Chr2	6217601	6217700	100.27	5.73	54.56	0	0	57	1	33.1	1.36	0	Replicate1
Chr2	6248901	6249000	244.94	0	24.8	0	0	192	5	8.27	0	0	Replicate2
Chr2	6250301	6250600	478.41	15.75	292.64	0	0	550	8	246.84	0	1.4	Replicate1 + Replicate2
Chr2	6262601	6262700	31.51	2.86	26.45	0	0	45	5	26.2	0	0	Replicate2
Chr2	6263401	6263600	1218.96	18.62	1023.41	0	0	1001	3	1002.52	0	0	Replicate1
Chr2	6263801	6263900	107.43	5.73	84.32	0	0	182	5	74.47	0	0	Replicate1 + Replicate2
Chr2	6264201	6264400	764.89	2.86	178.56	0	0	691	11	143.42	0	0	Replicate2
Chr2	6267401	6267500	230.61	5.73	281.07	0	0	254	1	293.72	0	0	Replicate1
Chr2	6268201	6268300	240.64	5.73	54.56	0	0	185	1	46.89	0	0	Replicate1
Chr2	6269901	6270300	5116.49	55.86	4900.47	10.9	7.54	4327	61	4095.59	13.57	14	Replicate1 + Replicate2
Chr2	6270501	6270600	495.61	5.73	47.95	0	0	379	1	30.34	0	1.4	Replicate1
Chr2	6270801	6270900	250.67	8.59	122.35	0	0	294	3	88.25	0	0	Replicate1
Chr2	6288701	6288800	204.83	5.73	62.83	0	0	241	0	49.64	0	0	Replicate1
Chr2	6316401	6316500	174.75	2.86	18.19	0	0	165	5	8.27	0	0	Replicate2
Chr2	6316701	6316800	405.37	10.03	163.68	1.56	0	443	9	165.48	0	0	Replicate1 + Replicate2
Chr2	6318001	6318100	779.22	12.89	180.21	0	1.51	589	18	194.44	0	0	Replicate1 + Replicate2
Chr2	6332801	6332900	104.56	0	89.28	0	0	66	5	95.15	0	0	Replicate2
Chr2	6333601	6333700	60.16	5.73	47.95	0	0	75	0	64.81	0	0	Replicate1
Chr2	6336501	6336600	35.81	0	130.61	0	0	83	8	135.14	0	0	Replicate2
Chr2	6344701	6344900	1978.13	52.99	1658.29	0	1.51	2139	55	1380.37	4.07	4.2	Replicate1 + Replicate2
Chr2	6382901	6383300	1807.67	30.07	596.85	1.56	0	1902	23	430.25	2.72	0	Replicate1 + Replicate2
Chr2	6395501	6395600	640.28	8.59	72.75	0	0	1147	3	93.77	0	0	Replicate1
Chr2	6402701	6402800	1840.62	11.46	140.53	0	3.01	1566	7	159.96	0	0	Replicate1 + Replicate2
Chr2	6405801	6405900	289.34	14.32	105.81	0	0	315	4	77.22	1.36	1.4	Replicate1
Chr2	6411101	6411200	1287.72	31.51	858.08	0	3.01	1218	21	631.57	0	0	Replicate1 + Replicate2
Chr2	6415301	6415400	1462.47	12.89	127.31	1.56	1.51	1470	12	92.39	0	0	Replicate1 + Replicate2
Chr2	6469101	6469200	517.09	27.22	94.24	0	0	528	23	71.71	1.36	0	Replicate1 + Replicate2
Chr2	6544401	6544500	1599.98	11.46	76.05	0	0	1793	12	78.6	0	0	Replicate1 + Replicate2
Chr2	6566101	6566500	1254.77	37.25	1352.43	0	1.51	1411	33	1230.05	4.07	2.8	Replicate1 + Replicate2
Chr2	6566701	6566800	191.94	0	190.13	0	0	228	5	183.4	0	1.4	Replicate2
Chr2	6567001	6567100	204.83	4.3	256.27	0	1.51	262	5	224.77	0	0	Replicate2
Chr2	6568101	6568200	296.5	5.73	190.13	0	0	274	7	140.66	0	1.4	Replicate1 + Replicate2
Chr2	6572001	6572300	1428.09	17.19	1244.95	0	1.51	1441	24	1057.68	5.43	2.8	Replicate1 + Replicate2
Chr2	6572601	6572700	126.05	7.16	110.77	0	0	176	4	150.31	0	0	Replicate1
Chr2	6577801	6577900	266.42	5.73	200.05	0	0	359	2	158.58	0	0	Replicate1
Chr2	6579401	6579500	234.91	1.43	137.23	0	0	272	6	86.88	1.36	0	Replicate2
Chr2	6592501	6592900	941.07	22.91	920.9	3.11	1.51	1087	33	872.89	0	0	Replicate1 + Replicate2
Chr2	6592501	6592900	941.07	22.91	920.9	3.11	1.51	1087	33	872.89	0	0	Replicate1 + Replicate2
Chr2	6593201	6593300	194.8	4.3	248	0	1.51	250	5	219.26	0	0	Replicate2
Chr2	6594301	6594400	309.4	5.73	221.55	0	0	286	7	169.61	0	1.4	Replicate1 + Replicate2
Chr2	6598201	6598300	369.56	10.03	462.93	0	1.51	344	12	391.63	1.36	0	Replicate1 + Replicate2
Chr2	6602401	6602700	787.81	11.46	367.05	0	0	948	4	353.02	0	0	Replicate1
Chr2	6606401	6606500	156.13	5.73	41.33	0	0	171	1	45.51	0	0	Replicate1
Chr2	6607001	6607100	275.02	4.3	355.47	1.56	0	266	6	300.62	0	0	Replicate2
Chr2	6607601	6607900	1469.63	20.05	1676.48	1.56	3.02	1544	13	1376.22	2.72	0	Replicate1 + Replicate2
Chr2	6648701	6648800	85.94	0	11.57	0	0	90	7	13.79	0	1.4	Replicate2
Chr2	6659301	6659700	684.69	12.89	461.27	0	0	627	21	354.39	1.36	0	Replicate2
Chr2	6661101	6661200	159	5.73	97.55	0	0	163	3	89.63	0	0	Replicate1
Chr2	6662401	6662500	151.83	5.73	160.37	0	0	162	5	122.73	0	0	Replicate1 + Replicate2
Chr2	6663201	6663400	943.94	8.59	128.96	1.56	0	915	14	132.39	0	0	Replicate1 + Replicate2
Chr2	6665801	6665900	88.81	0	18.19	0	0	93	5	13.79	0	1.4	Replicate2
Chr2	6668101	6668200	466.96	7.16	9.92	0	0	472	10	13.79	0	0	Replicate1 + Replicate2
Chr2	6678501	6678600	243.51	4.3	84.32	0	0	174	6	95.15	0	0	Replicate2
Chr2	6680201	6680400	1834.89	17.18	332.32	0	1.51	1842	28	313.03	1.36	2.8	Replicate1 + Replicate2
Chr2	6680601	6680700	537.15	2.86	76.05	1.56	0	593	6	66.19	0	0	Replicate2
Chr2	6680701	6680800	1801.95	15.76	185.17	0	0	1954	4	184.78	0	2.8	Replicate1
Chr2	6686901	6687000	794.98	7.16	46.29	1.56	1.51	621	2	53.78	0	0	Replicate1
Chr2	6691601	6691700	383.88	10.03	300.91	0	0	428	5	233.05	0	0	Replicate1 + Replicate2
Chr2	6714801	6714900	325.15	1.43	117.39	0	0	323	5	81.36	0	0	Replicate2
Chr2	6716101	6716200	561.5	25.78	426.56	0	0	657	27	388.87	0	0	Replicate1 + Replicate2
Chr2	6731501	6731600	1085.75	27.22	153.76	0	0	1229	31	182.03	0	0	Replicate1 + Replicate2
Chr2	6733001	6733100	273.59	5.73	135.57	0	0	371	4	115.83	0	0	Replicate1
Chr2	6736301	6736400	55.86	14.32	24.8	0	0	55	8	17.93	0	0	Replicate1 + Replicate2
Chr2	6761201	6761300	67.32	5.73	14.88	0	0	74	1	11.03	0	0	Replicate1
Chr2	6803601	6803700	677.52	5.73	200.05	0	0	491	4	180.65	0	0	Replicate1
Chr2	6804101	6804200	408.23	5.73	85.97	0	0	343	1	67.57	0	0	Replicate1
Chr2	6843001	6843100	686.11	0	28.11	0	0	461	5	39.99	0	1.4	Replicate2
Chr2	6852701	6852800	246.37	4.3	82.67	0	0	174	6	97.91	0	0	Replicate2
Chr2	6853301	6853400	127.48	7.16	34.72	0	0	124	1	35.85	0	0	Replicate1
Chr2	6854401	6854500	1446.71	12.89	135.57	0	0	1488	14	124.11	0	1.4	Replicate1 + Replicate2
Chr2	6854901	6855000	1694.52	8.59	191.79	0	1.51	1328	8	186.16	0	0	Replicate1 + Replicate2
Chr2	6892301	6892600	1863.53	38.68	1489.65	0	1.51	1950	51	1388.64	1.36	5.6	Replicate1 + Replicate2
Chr2	6893001	6893100	395.34	5.73	57.87	0	0	329	2	55.16	0	0	Replicate1
Chr2	6897101	6897200	186.21	1.43	19.84	0	1.51	164	5	13.79	0	0	Replicate2
Chr2	6901801	6901900	646.01	15.76	246.35	0	0	547	8	217.88	0	0	Replicate1 + Replicate2
Chr2	6922501	6922600	100.27	7.16	38.03	0	0	96	9	48.26	0	0	Replicate1 + Replicate2
Chr2	6922901	6923100	2003.91	14.32	454.67	3.11	7.54	2121	26	383.36	9.5	1.4	Replicate1 + Replicate2
Chr2	6924001	6924100	12831.3	25.78	1431.78	6.23	0	11251	29	1361.06	1.36	1.4	Replicate1 + Replicate2
Chr2	6924301	6924700	2178.66	38.67	907.69	1.56	1.51	2044	36	802.57	0	0	Replicate1 + Replicate2
Chr2	6924301	6924700	2178.66	38.67	907.69	1.56	1.51	2044	36	802.57	0	0	Replicate1 + Replicate2
Chr2	6945101	6945300	242.07	14.32	208.32	0	0	353	4	151.68	1.36	0	Replicate1
Chr2	6945501	6945600	94.54	5.73	67.79	0	0	139	4	37.23	0	0	Replicate1
Chr2	6953101	6953200	263.56	14.32	39.68	0	0	352	14	39.99	0	0	Replicate1 + Replicate2
Chr2	6969101	6969200	285.05	8.59	231.47	0	0	351	6	222.02	0	0	Replicate1 + Replicate2
Chr2	6977901	6978000	41.54	2.86	33.07	0	0	58	6	31.72	0	0	Replicate2
Chr2	6986601	6986700	131.78	5.73	11.57	0	0	139	2	20.68	0	0	Replicate1
Chr2	6992301	6992400	240.64	1.43	16.53	0	0	155	5	23.44	0	0	Replicate2
Chr2	6994601	6994700	438.31	40.11	162.03	1.56	0	607	53	146.17	1.36	0	Replicate1 + Replicate2
Chr2	7008601	7008700	171.89	5.73	145.49	0	0	166	1	124.11	0	0	Replicate1
Chr2	7009101	7009200	388.18	1.43	81.01	0	0	261	6	85.5	0	0	Replicate2
Chr2	7033501	7033600	61.59	5.73	8.27	0	0	59	6	2.76	0	0	Replicate1
Chr2	7066801	7066900	297.94	8.59	82.67	0	0	337	3	73.09	1.36	0	Replicate1
Chr2	7066901	7067000	267.86	4.3	148.8	1.56	0	260	9	119.97	0	0	Replicate2
Chr2	7070901	7071000	908.13	10.03	145.49	0	0	1055	8	122.73	0	0	Replicate1 + Replicate2
Chr2	7094401	7094500	631.68	15.76	274.45	0	0	529	8	233.05	0	0	Replicate1 + Replicate2
Chr2	7111901	7112000	229.18	7.16	89.28	0	0	244	3	63.43	0	0	Replicate1
Chr2	7119901	7120000	186.21	5.73	84.32	0	0	198	7	95.15	0	0	Replicate1 + Replicate2
Chr2	7148101	7148200	83.08	2.86	82.67	0	0	150	9	73.09	0	0	Replicate2
Chr2	7149701	7149800	448.34	4.3	26.45	0	0	465	6	17.93	0	0	Replicate2
Chr2	7153601	7153800	1587.09	5.73	128.96	0	1.51	1629	13	132.38	0	1.4	Replicate2
Chr2	7154001	7154100	1175.99	12.89	233.12	1.56	0	842	7	173.75	0	0	Replicate1 + Replicate2
Chr2	7155501	7155800	2089.85	24.34	859.73	1.56	0	2497	24	958.39	2.72	0	Replicate1 + Replicate2
Chr2	7156201	7156600	2594.06	30.07	945.71	0	0	2857	20	950.12	2.72	1.4	Replicate1 + Replicate2
Chr2	7161201	7161400	1644.38	22.92	290.99	1.56	0	1875	20	224.78	0	0	Replicate1 + Replicate2
Chr2	7167901	7168000	233.48	28.65	21.49	0	0	306	29	42.75	0	0	Replicate2
Chr2	7169001	7169100	12741.1	15.76	1251.57	3.11	0	11179	21	1184.55	0	1.4	Replicate1 + Replicate2
Chr2	7175801	7175900	126.05	0	90.93	0	0	150	6	57.92	0	0	Replicate2
Chr2	7176401	7176600	1594.25	31.52	429.86	0	4.52	1816	32	337.86	0	0	Replicate1 + Replicate2
Chr2	7176801	7176900	643.14	15.76	271.15	0	0	605	8	231.67	0	0	Replicate1 + Replicate2
Chr2	7178401	7178500	379.58	4.3	114.08	0	0	493	8	128.25	0	0	Replicate2
Chr2	7224201	7224300	369.56	5.73	138.88	0	1.51	394	6	115.83	0	0	Replicate1 + Replicate2
Chr2	7224701	7224800	68.75	4.3	89.28	0	0	49	5	82.74	0	0	Replicate2
Chr2	7238701	7238800	156.13	1.43	71.09	0	0	193	10	68.95	0	0	Replicate2
Chr2	7257301	7257400	330.88	5.73	59.52	0	0	289	5	52.4	0	0	Replicate1 + Replicate2
Chr2	7289401	7289500	300.8	2.86	209.97	0	0	311	8	204.09	1.36	0	Replicate2
Chr2	7289501	7289600	1167.4	12.89	548.91	0	0	1245	2	478.51	2.71	1.4	Replicate1
Chr2	7289701	7289800	381.02	1.43	183.52	1.56	0	281	7	177.89	0	1.4	Replicate2
Chr2	7291501	7291700	1622.9	11.46	269.5	0	0	1514	11	262	1.36	0	Replicate1 + Replicate2
Chr2	7295001	7295100	363.83	2.86	236.43	1.56	0	282	6	233.05	0	2.8	Replicate2
Chr2	7327401	7327500	250.67	5.73	4.96	0	0	321	8	8.27	0	0	Replicate2
Chr2	7340401	7340500	452.63	10.03	158.72	0	0	482	3	143.41	0	0	Replicate1
Chr2	7418801	7418900	547.17	8.59	117.39	0	0	574	18	132.38	0	0	Replicate1 + Replicate2
Chr2	7419201	7419400	2138.56	21.49	486.08	4.67	10.55	2321	38	426.1	5.43	4.2	Replicate1 + Replicate2
Chr2	7420801	7420900	353.8	10.03	16.53	0	0	216	1	23.44	2.71	0	Replicate1
Chr2	7421701	7421800	25.78	1.43	24.8	0	0	48	5	13.79	0	0	Replicate2
Chr2	7441701	7441800	958.27	4.3	160.37	0	0	1067	7	144.79	0	0	Replicate2
Chr2	7496401	7496500	1287.72	11.46	117.39	0	0	1341	7	129.62	0	0	Replicate1 + Replicate2
Chr2	7558401	7558500	173.32	4.3	13.23	0	0	147	5	12.41	0	0	Replicate2
Chr2	7581501	7581700	2151.45	20.05	1501.23	0	3.01	2226	21	1318.31	1.36	0	Replicate1 + Replicate2
Chr2	7583601	7583700	393.91	1.43	228.16	1.56	0	275	6	190.3	0	2.8	Replicate2
Chr2	7583801	7584000	2970.78	25.79	770.45	1.56	0	2766	15	701.9	0	1.4	Replicate1 + Replicate2
Chr2	7616301	7616400	171.89	0	81.01	0	0	326	5	85.5	0	0	Replicate2
Chr2	7632701	7632800	252.1	2.86	3.31	0	0	222	5	5.52	0	0	Replicate2
Chr2	7650501	7650600	287.91	5.73	54.56	0	0	286	3	44.13	1.36	0	Replicate1
Chr2	7777201	7777300	108.86	7.16	114.08	0	0	132	0	100.67	0	0	Replicate1
Chr2	7814101	7814200	232.05	5.73	133.92	0	0	275	1	93.77	0	0	Replicate1
Chr2	7861101	7861200	164.72	5.73	19.84	1.56	0	185	1	17.93	0	0	Replicate1
Chr2	7889701	7889800	1042.78	5.73	181.87	1.56	0	1080	9	150.31	1.36	2.8	Replicate1 + Replicate2
Chr2	7906001	7906100	365.26	1.43	66.13	0	0	403	7	51.02	0	0	Replicate2
Chr2	7956001	7956500	2248.84	42.97	1043.25	3.12	9.04	2295	49	1156.97	6.79	4.2	Replicate1 + Replicate2
Chr2	7956001	7956500	2248.84	42.97	1043.25	3.12	9.04	2295	49	1156.97	6.79	4.2	Replicate1 + Replicate2
Chr2	7959901	7960000	226.32	7.16	77.71	0	0	307	1	55.16	0	0	Replicate1
Chr2	7960701	7961000	13182.3	24.34	1552.48	3.11	0	7502	38	1406.57	0	2.8	Replicate1 + Replicate2
Chr2	7963701	7963800	497.04	12.89	130.61	0	0	566	6	147.55	0	0	Replicate1 + Replicate2
Chr2	7976201	7976400	1637.23	28.65	208.32	1.56	0	1418	18	150.31	0	0	Replicate1 + Replicate2
Chr2	8009301	8009600	1167.4	5.72	532.37	1.56	1.51	1239	25	529.52	0	0	Replicate2
Chr2	8017601	8017700	80.21	5.73	16.53	0	0	82	5	6.89	0	0	Replicate1 + Replicate2
Chr2	8035601	8035700	535.71	7.16	21.49	0	0	677	2	6.89	0	0	Replicate1
Chr2	8046201	8046300	243.51	4.3	39.68	0	0	250	6	42.75	0	0	Replicate2
Chr2	8075001	8075100	226.32	7.16	52.91	0	0	205	3	27.58	0	0	Replicate1
Chr2	8102901	8103000	91.67	10.03	34.72	0	0	119	3	41.37	0	0	Replicate1
Chr2	8172801	8172900	232.05	7.16	23.15	0	0	282	4	34.47	0	0	Replicate1
Chr2	8173501	8173600	826.49	17.19	358.77	0	0	704	18	256.49	0	0	Replicate1 + Replicate2
Chr2	8198401	8198500	199.1	4.3	19.84	0	0	187	8	11.03	0	0	Replicate2
Chr2	8201201	8201300	133.21	8.59	19.84	0	0	128	1	9.65	0	0	Replicate1
Chr2	8218001	8218100	614.49	10.03	107.47	0	0	847	4	89.63	1.36	0	Replicate1
Chr2	8220801	8220900	10.03	1.43	203.36	0	1.51	7	6	184.78	0	0	Replicate2
Chr2	8233301	8233400	70.19	5.73	33.07	0	0	90	1	23.44	0	0	Replicate1
Chr2	8380001	8380300	479.86	10.02	380.26	0	1.51	460	17	296.49	0	0	Replicate1 + Replicate2
Chr2	8381901	8382100	60.16	5.73	487.74	3.11	0	39	12	517.11	0	0	Replicate2
Chr2	8420601	8420700	3896.1	35.81	935.78	1.56	1.51	3692	28	741.89	0	2.8	Replicate1 + Replicate2
Chr2	8421001	8421200	1751.81	21.48	314.13	0	3.01	1728	27	290.97	2.71	1.4	Replicate1 + Replicate2
Chr2	8422801	8422900	133.21	1.43	34.72	0	0	85	6	39.99	0	0	Replicate2
Chr2	8455701	8455800	181.91	2.86	19.84	0	0	153	5	11.03	0	0	Replicate2
Chr2	8535201	8535300	1165.96	11.46	195.09	0	0	1147	11	165.48	0	0	Replicate1 + Replicate2
Chr2	8554801	8554900	310.83	1.43	117.39	0	0	315	5	79.98	0	0	Replicate2
Chr2	8555601	8555800	7025.87	121.76	2351.03	1.56	1.51	8181	126	2413.22	6.78	1.4	Replicate1 + Replicate2
Chr2	8566601	8566700	193.37	1.43	107.47	3.11	1.51	160	5	133.76	0	1.4	Replicate2
Chr2	8568601	8568700	166.16	1.43	19.84	1.56	0	163	5	12.41	0	0	Replicate2
Chr2	8568801	8568900	214.86	8.59	67.79	0	1.51	214	4	49.64	0	0	Replicate1
Chr2	8568901	8569000	272.15	2.86	208.32	0	0	358	7	257.87	1.36	0	Replicate2
Chr2	8569401	8569900	783.52	28.65	162.03	0	0	783	21	126.87	2.71	1.4	Replicate1 + Replicate2
Chr2	8575601	8575700	61.59	1.43	42.99	0	0	56	5	64.81	0	0	Replicate2
Chr2	8578601	8578700	1057.1	15.76	185.17	0	7.53	1011	9	147.55	4.07	0	Replicate1 + Replicate2
Chr2	8643601	8643700	743.41	7.16	299.25	0	0	763	10	310.27	1.36	0	Replicate1 + Replicate2
Chr2	8740301	8740400	2.86	1.43	150.45	3.11	1.51	4	6	150.31	2.71	0	Replicate2
Chr2	8815901	8816000	1645.82	7.16	14.88	0	0	1280	4	9.65	0	0	Replicate1
Chr2	8854401	8854500	3426.27	191.94	3629.06	0	4.52	4963	216	3356.45	8.14	1.4	Replicate1 + Replicate2
Chr2	8855101	8855200	159	4.3	51.25	3.11	0	182	8	41.37	0	1.4	Replicate2
Chr2	8894901	8895000	853.7	5.73	294.29	0	0	1274	8	303.38	0	2.8	Replicate1 + Replicate2
Chr2	8907801	8907900	197.67	7.16	391.84	0	0	193	2	368.19	0	0	Replicate1
Chr2	8908101	8908200	381.02	7.16	66.13	0	0	278	6	85.5	0	1.4	Replicate1 + Replicate2
Chr2	8911001	8911100	527.12	11.46	335.63	1.56	0	656	11	279.93	1.36	0	Replicate1 + Replicate2
Chr2	8911401	8911500	461.23	8.59	378.61	3.11	1.51	506	8	282.69	0	0	Replicate2
Chr2	8914101	8914200	464.09	7.16	39.68	0	0	362	2	20.68	0	0	Replicate1
Chr2	8914401	8914500	257.83	7.16	28.11	0	0	206	2	17.93	0	0	Replicate1
Chr2	8914801	8914900	601.6	7.16	51.25	0	0	491	2	26.2	1.36	0	Replicate1
Chr2	8915101	8915200	594.44	7.16	49.6	0	0	486	2	26.2	1.36	0	Replicate1
Chr2	8915401	8915500	582.98	7.16	47.95	0	0	480	2	26.2	0	0	Replicate1
Chr2	8915701	8915800	468.39	7.16	26.45	0	0	371	2	16.55	0	0	Replicate1
Chr2	8916001	8916100	584.41	7.16	47.95	0	0	481	2	26.2	1.36	0	Replicate1
Chr2	8916301	8916400	329.45	7.16	33.07	0	0	249	2	17.93	0	0	Replicate1
Chr2	8917301	8917400	835.08	14.32	67.79	0	0	783	6	63.43	0	0	Replicate1 + Replicate2
Chr2	9020301	9020400	280.75	4.3	51.25	0	0	280	10	31.72	0	0	Replicate2
Chr2	9030501	9030600	661.76	17.19	276.11	0	0	575	10	263.39	0	0	Replicate1 + Replicate2
Chr2	9048101	9048200	111.73	5.73	26.45	0	1.51	94	5	42.75	0	0	Replicate1 + Replicate2
Chr2	9048401	9048600	525.69	5.73	47.95	0	0	615	13	52.4	0	0	Replicate2
Chr2	9057201	9057500	1110.1	15.76	492.7	0	4.52	1153	9	398.53	6.78	1.4	Replicate1
Chr2	9059301	9059400	104.56	1.43	249.65	0	1.51	78	6	239.94	0	1.4	Replicate2
Chr2	9063201	9063300	382.45	5.73	52.91	0	0	323	9	42.75	0	0	Replicate1 + Replicate2
Chr2	9063501	9063600	413.96	4.3	196.75	0	0	464	9	202.71	0	0	Replicate2
Chr2	9063601	9063700	57.3	5.73	19.84	1.56	0	52	1	23.44	0	0	Replicate1
Chr2	9064101	9064300	442.61	17.19	185.17	0	0	466	18	143.41	0	1.4	Replicate1 + Replicate2
Chr2	9079801	9079900	746.27	8.59	16.53	0	0	1007	14	30.34	0	0	Replicate1 + Replicate2
Chr2	9122401	9122500	383.88	2.86	228.16	0	0	308	5	170.99	0	0	Replicate2
Chr2	9123001	9123100	25.78	5.73	71.09	0	0	23	0	44.13	0	0	Replicate1
Chr2	9197001	9197200	2886.26	22.91	553.86	0	0	3122	20	564	0	1.4	Replicate1 + Replicate2
Chr2	9225801	9225900	42.97	7.16	16.53	0	0	49	3	19.31	0	0	Replicate1
Chr2	9311401	9311500	2114.21	47.27	686.13	0	1.51	1665	13	499.19	4.07	1.4	Replicate1 + Replicate2
Chr2	9312201	9312300	94.54	1.43	363.73	0	0	154	5	350.26	0	1.4	Replicate2
Chr2	9433101	9433200	1751.81	21.49	791.94	0	3.01	1600	16	643.99	1.36	0	Replicate1 + Replicate2
Chr2	9433401	9433500	674.66	14.32	218.24	0	0	797	10	173.75	0	0	Replicate1 + Replicate2
Chr2	9449201	9449400	320.85	5.73	262.88	0	0	309	13	233.05	0	0	Replicate2
Chr2	9456001	9456100	2185.83	53	1033.33	0	1.51	2095	19	677.08	1.36	1.4	Replicate1 + Replicate2
Chr2	9496801	9497000	3033.8	22.91	198.4	0	0	2825	21	177.88	0	0	Replicate1 + Replicate2
Chr2	9530101	9530200	968.3	12.89	386.88	0	0	1075	4	329.58	0	0	Replicate1
Chr2	9559601	9559700	360.96	0	18.19	0	0	419	8	28.96	0	0	Replicate2
Chr2	9585201	9585300	631.68	18.62	254.61	0	0	547	12	231.67	0	0	Replicate1 + Replicate2
Chr2	9592001	9592100	615.93	12.89	31.41	0	1.51	559	17	31.72	0	1.4	Replicate1 + Replicate2
Chr2	9633501	9633700	8792	138.94	2618.87	4.67	3.02	10210	120	2622.83	5.43	1.4	Replicate1 + Replicate2
Chr2	9652301	9652400	137.51	7.16	52.91	0	1.51	145	5	57.92	0	0	Replicate1 + Replicate2
Chr2	9655401	9655600	2664.25	14.33	987.04	1.56	0	2611	22	904.61	2.71	1.4	Replicate1 + Replicate2
Chr2	9655901	9656100	816.46	15.75	477.82	1.56	0	904	8	415.08	1.36	0	Replicate1 + Replicate2
Chr2	9656601	9656700	160.43	1.43	39.68	0	0	160	5	26.2	0	0	Replicate2
Chr2	9692301	9693100	2442.23	10.01	793.6	0	0	2979	41	910.13	0	0	Replicate2
Chr2	9773701	9773800	84.51	5.73	19.84	0	1.51	118	3	12.41	0	0	Replicate1
Chr2	9850201	9850300	597.31	12.89	112.43	1.56	0	761	10	70.33	0	0	Replicate1 + Replicate2
Chr2	9860001	9860100	2094.15	37.24	676.21	0	1.51	2077	21	415.07	0	0	Replicate1 + Replicate2
Chr2	9891301	9891400	136.08	5.73	375.31	0	0	140	0	307.51	0	0	Replicate1
Chr2	9896701	9896800	5908.61	5.73	218.24	1.56	0	4070	7	204.09	0	0	Replicate1 + Replicate2
Chr2	9897201	9897400	2488.06	18.62	940.75	0	0	2401	26	930.82	1.36	1.4	Replicate1 + Replicate2
Chr2	9922601	9922900	1206.07	12.89	52.91	0	0	960	4	55.16	0	0	Replicate1
Chr2	9980801	9980900	121.75	0	19.84	0	0	160	5	5.52	0	0	Replicate2
Chr2	9982201	9982300	474.12	5.73	29.76	0	0	494	8	31.72	0	0	Replicate1 + Replicate2
Chr2	10018101	10018300	3933.34	47.27	864.69	1.56	1.51	3760	49	712.93	0	2.8	Replicate1 + Replicate2
Chr2	10018601	10018700	1534.09	12.89	218.24	1.56	0	1578	20	188.92	0	4.2	Replicate1 + Replicate2
Chr2	10070101	10070300	832.22	18.62	370.34	0	0	813	19	271.66	0	0	Replicate1 + Replicate2
Chr2	10089701	10090300	3824.49	65.88	5831.3	3.11	9.04	4039	58	4480.32	1.36	0	Replicate1 + Replicate2
Chr2	10092501	10092700	379.58	8.59	277.76	1.56	0	290	11	268.9	0	0	Replicate1 + Replicate2
Chr2	10093401	10093600	1398.01	11.46	231.47	1.56	0	981	14	267.53	0	1.4	Replicate1 + Replicate2
Chr2	10194801	10195000	2450.82	14.32	395.15	0	0	2433	12	357.15	0	0	Replicate1 + Replicate2
Chr2	10239401	10239500	584.41	14.32	319.09	0	1.51	660	7	333.71	1.36	4.2	Replicate1
Chr2	10306101	10306200	723.36	7.16	168.64	0	0	841	5	159.96	0	0	Replicate1 + Replicate2
Chr2	10351501	10351700	4539.24	289.34	9868.72	1.56	7.54	6485	278	9392.26	20.35	9.8	Replicate1 + Replicate2
Chr2	10406601	10406700	290.77	7.16	160.37	0	0	327	6	170.99	0	0	Replicate1 + Replicate2
Chr2	10435101	10435200	328.02	10.03	44.64	0	0	408	8	44.13	0	0	Replicate1 + Replicate2
Chr2	10436301	10436400	736.25	10.03	294.29	0	1.51	1083	9	292.34	0	1.4	Replicate1 + Replicate2
Chr2	10436901	10437100	2181.53	5.73	606.77	1.56	0	1981	20	460.58	1.36	1.4	Replicate2
Chr2	10437201	10437300	584.41	5.73	95.89	0	1.51	578	3	96.53	1.36	1.4	Replicate1
Chr2	10467601	10467700	535.71	15.76	44.64	0	3.01	683	6	59.3	0	0	Replicate1 + Replicate2
Chr2	10566201	10566500	1214.67	10.02	206.67	0	0	1242	15	198.58	1.36	0	Replicate1 + Replicate2
Chr2	10588801	10588900	401.07	1.43	34.72	0	0	555	13	20.68	0	0	Replicate2
Chr2	10590601	10590700	815.03	5.73	21.49	0	0	999	17	20.68	0	0	Replicate1 + Replicate2
Chr2	10592301	10592400	435.45	2.86	107.47	1.56	0	608	8	159.96	0	0	Replicate2
Chr2	10608301	10608400	137.51	2.86	128.96	0	0	187	5	113.08	0	1.4	Replicate2
Chr2	10621601	10621700	199.1	2.86	31.41	0	0	224	5	38.61	0	0	Replicate2
Chr2	10678101	10678300	1059.97	44.4	395.15	1.56	1.51	1107	39	319.92	2.72	1.4	Replicate1 + Replicate2
Chr2	10682801	10682900	3490.73	199.1	5120.36	1.56	4.52	4964	199	4775.42	12.21	5.6	Replicate1 + Replicate2
Chr2	10683201	10683300	61.59	5.73	14.88	0	0	66	0	22.06	0	0	Replicate1
Chr2	10687001	10687100	1041.35	8.59	79.36	0	0	1137	8	57.92	0	0	Replicate1 + Replicate2
Chr2	10755201	10755300	65.89	5.73	57.87	0	1.51	72	3	34.47	0	0	Replicate1
Chr2	10874301	10874400	242.07	4.3	76.05	0	0	321	8	85.5	0	0	Replicate2
Chr2	10876901	10877000	61.59	0	109.12	0	0	95	6	121.35	0	0	Replicate2
Chr2	10878801	10879000	479.85	12.89	208.32	0	0	528	3	215.12	0	0	Replicate1
Chr2	10879801	10880200	1054.25	21.47	390.18	0	1.51	1068	32	409.55	2.72	2.8	Replicate1 + Replicate2
Chr2	11058301	11058400	219.16	5.73	97.55	0	0	291	6	97.91	0	0	Replicate1 + Replicate2
[truncated: 3,596 more rows]
