# Supplementary material for: Identification of Pol IV and RDR2-dependent precursors of 24 nt siRNAs guiding de novo DNA methylation in Arabidopsis
Source: eLife journal article supplement (doi:10.7554/elife.09591), 2015-10-02
Supplement: supp [file elife_poa_e09591_Supplementary_File_2.xlsx]

## Sheet: Lee et al. 2015 P4-siRNA loci
	Blevins et al, Supplementary file 2. Overlap between P4R2 RNAs and Pol IV transcript loci of Li et al.
	Genomic positions reported by Li et al. 2015				dcl2/3/4 Replicate #1		dcl2/3/4 Replicate #2
	Name	Chrom	Start Position	End Position	(≥ 26nt RNA inserts)		(≥ 26nt RNA inserts)
					unique reads	total reads	unique reads	total reads
	Locus 01	Chr1	11619088	11619830	2	2	1	1
	Locus 02	Chr3	5780028	5780762	2	2	2	2
	Locus 03	Chr3	7419920	7421330	9	10	6	6
	Locus 04	Chr3	10691074	10691841	4	4	3	3
	Locus 05	Chr3	10747222	10748309	10	10	4	5
	Locus 06	Chr1	4506452	4507032	2	3	3	4
	Locus 08	Chr2	5661047	5661660	0	0	5	8
	Locus 13	Chr2	2865442	2866452	0	0	2	2
	Locus 20	Chr3	11042663	11043163	1	1	1	1
	Locus 23	Chr3	14729148	14731788	24	26	27	29
	Locus 26	Chr3	15682149	15682550	3	3	3	3
	Locus 27	Chr3	17842320	17843219	22	26	28	34
	Locus 28	Chr3	20030863	20031378	6	8	4	7
	Locus 30	Chr1	23453816	23455008	7	8	2	2
	Locus 33	Chr4	12841422	12842570	13	14	11	13
	Locus 38	Chr4	272801	273244	8	9	8	9
	Locus 40	Chr5	9800868	9801476	3	3	4	4
	Locus 41	Chr5	1410300	1410550	28	57	40	77
	Locus 42	Chr5	17174556	17175364	76	140	75	160
	Locus 43	Chr5	20313464	20314875	22	29	26	32
	Locus 44	Chr5	22706840	22707252	0	0	0	0
	Locus 45	Chr5	22707688	22708114	0	0	0	0
